# Supplementary material
Source: PubMed Central journal article supplement (PMC7812085)
Supplement: bmjopen-2020-045309.draft_revisions.pdf [file bmjopen-2020-045309.draft_revisions.pdf]

# BMJ Open

BMJ Open is committed to open peer review. As part of this commitment we make the peer review history of every article we publish publicly available.

When an article is published we post the peer reviewers' comments and the authors' responses online. We also post the versions of the paper that were used during peer review. These are the versions that the peer review comments apply to.

The versions of the paper that follow are the versions that were submitted during the peer review process. They are not the versions of record or the final published versions. They should not be cited or distributed as the published version of this manuscript.

BMJ Open is an open access journal and the full, final, typeset and author-corrected version of record of the manuscript is available on our site with no access controls, subscription charges or pay-per-view fees (<http://bmjopen.bmj.com>).

If you have any questions on BMJ Open's open peer review process please email [info.bmjopen@bmj.com](mailto:info.bmjopen@bmj.com)

# BMJ Open

## Awareness, Attitudes and Actions of UK adults at high risk of severe illness from COVID-19

|                               |                                                                                                                                                                                                                                                                                                             |
|-------------------------------|-------------------------------------------------------------------------------------------------------------------------------------------------------------------------------------------------------------------------------------------------------------------------------------------------------------|
| Journal:                      | <i>BMJ Open</i>                                                                                                                                                                                                                                                                                             |
| Manuscript ID                 | bmjopen-2020-045309                                                                                                                                                                                                                                                                                         |
| Article Type:                 | Original research                                                                                                                                                                                                                                                                                           |
| Date Submitted by the Author: | 27-Sep-2020                                                                                                                                                                                                                                                                                                 |
| Complete List of Authors:     | Flint, Stuart; University of Leeds Faculty of Medicine and Health, Brown, Adrian; UCL, Medicine; Imperial College London, Medicine Tahrani, Abd; University of Birmingham, Institute of Metabolism and Systems Research<br>Piotrkowicz, Alicja; Scaled Insights<br>Joseph, Anny-Claude; US Military Academy |
| Keywords:                     | COVID-19, Public health < INFECTIOUS DISEASES, MENTAL HEALTH, DIABETES & ENDOCRINOLOGY                                                                                                                                                                                                                      |
|                               |                                                                                                                                                                                                                                                                                                             |

SCHOLARONE™  
Manuscripts

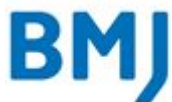

I, the Submitting Author has the right to grant and does grant on behalf of all authors of the Work (as defined in the below author licence), an exclusive licence and/or a non-exclusive licence for contributions from authors who are: i) UK Crown employees; ii) where BMJ has agreed a CC-BY licence shall apply, and/or iii) in accordance with the terms applicable for US Federal Government officers or employees acting as part of their official duties; on a worldwide, perpetual, irrevocable, royalty-free basis to BMJ Publishing Group Ltd ("BMJ") its licensees and where the relevant Journal is co-owned by BMJ to the co-owners of the Journal, to publish the Work in this journal and any other BMJ products and to exploit all rights, as set out in our [licence](#).

The Submitting Author accepts and understands that any supply made under these terms is made by BMJ to the Submitting Author unless you are acting as an employee on behalf of your employer or a postgraduate student of an affiliated institution which is paying any applicable article publishing charge ("APC") for Open Access articles. Where the Submitting Author wishes to make the Work available on an Open Access basis (and intends to pay the relevant APC), the terms of reuse of such Open Access shall be governed by a Creative Commons licence – details of these licences and which [Creative Commons](#) licence will apply to this Work are set out in our licence referred to above.

Other than as permitted in any relevant BMJ Author's Self Archiving Policies, I confirm this Work has not been accepted for publication elsewhere, is not being considered for publication elsewhere and does not duplicate material already published. I confirm all authors consent to publication of this Work and authorise the granting of this licence.

## Awareness, Attitudes and Actions of UK adults at high risk of severe illness from COVID-19

Stuart W. Flint,<sup>1,2</sup> Adrian Brown,<sup>3,4</sup> Abd A. Tahrani,<sup>5,6,7</sup> Alicja Piotrkowicz,<sup>2,8</sup> Anny-Claude Joseph,<sup>9</sup>

<sup>1</sup>School of Psychology, University of Leeds, Leeds, UK

<sup>2</sup>Scaled Insights, Nexus, University of Leeds, Leeds, UK

<sup>3</sup>Centre for Obesity Research, University College London, London, UK

<sup>4</sup>National Institute of Health Research, University College London, London, UK

<sup>5</sup>Institute of Metabolism and Systems Research, University of Birmingham, Birmingham, UK

<sup>6</sup>Department of Diabetes and Endocrinology, University Hospitals Birmingham NHS Foundation Trust, Birmingham, UK

<sup>7</sup>Centre for Endocrinology, Diabetes and Metabolism, Birmingham Health Partners, Birmingham, UK

<sup>8</sup>School of Computing, University of Leeds, Leeds, UK

<sup>9</sup>Department of Mathematical Sciences, US Military Academy, West Point, NY, USA

Contact details: Dr Stuart W. Flint, School of Psychology, University of Leeds, Leeds, UK, LS2 9JT;  
[s.w.flint@leeds.ac.uk](mailto:s.w.flint@leeds.ac.uk)

Word Count: 4015

## Key points

### *What is already known about this topic?*

- During the COVID-19 lockdown there was no research evidence published on the impact of the pandemic on people at high risk of severe illness and death from COVID-19 infection.
- Since then, there has been a paucity of evidence published examining this vulnerable population, with no evidence of how this has impacted access to healthcare and use of technology, with little evidence on mental health and lifestyle behaviours.
- To date, there has been no research using Artificial Intelligence to gain greater insights to improve our understanding of how people are responding to the pandemic.

### *What this study adds*

- This original research provides new insights into the impact of the COVID-19 lockdown on awareness, attitudes and actions of people identified as at high risk of severe illness as identified by the UK Government.
- Our novel insights highlight the impact that the COVID-19 lockdown has had on access to healthcare, mental health and lifestyle behaviours.
- We have also used an innovative Artificial Intelligence tool to further our understanding on the impact that COVID-19 lockdown has had on this vulnerable population.

## Abstract

### *Objectives*

This study explored the impact of COVID-19 on people identified as at high risk of severe illness by UK Government, and in particular, the impact of lockdown on access to healthcare, medications and use of technological platforms.

### *Design*

Online survey methodology

### *Setting*

UK

### *Participants*

1038 UK adults were recruited who were either identified by UK Government as at high risk of severe illness from COVID-19 or self-identified as at high risk with acute or other chronic health conditions not included in the UK Government list. Participants were recruited through social media advertisements, health charities and patient organisations.

### *Main outcomes measures*

The Awareness, Attitudes and Actions survey which explores the impact of COVID-19, on including access to healthcare, use of technology for health condition management, mental health, depression, wellbeing, and lifestyle behaviours.

### *Results*

Nearly half of the sample reported that their mental health had worsened during the COVID-19 lockdown. Management of health conditions changed including access to medications and delayed surgery, with nearly half of the sample using telephone care. Artificial Intelligence identified that participants in the negative cluster had higher neuroticism, insecurity and negative sentiment. Participants in this cluster reported more negative impacts on lifestyle behaviours, higher depression and lower wellbeing, alongside lower satisfaction with platforms to deliver healthcare.

### *Conclusions*

This study provides novel evidence of the impact of COVID-19 on people identified as at high risk of severe illness. These findings should be considered by policymakers and healthcare professionals to avoid unintended consequences of continued restrictions and future pandemic responses.

*Keywords: COVID-19; Lockdown; Attitudes; Behaviours; Artificial Intelligence; High Risk*

## Article Summary

### *Strengths and limitations of this study*

- This original research provides new insights into the impact of the COVID-19 lockdown on awareness, attitudes and actions of people identified as at high risk of severe illness as identified by the UK Government.
- Our novel insights highlight the impact that the COVID-19 lockdown has had on access to healthcare, mental health and lifestyle behaviours.
- We have also used an innovative Artificial Intelligence tool to further our understanding on the impact that COVID-19 lockdown has had on this vulnerable population.
- The study provides a cross-sectional analysis, and as such informs about the COVID-19 lockdown period. Nevertheless, this study provides much needed insights about a subsection of the population who have been subject to greater restrictions and as the findings demonstrate, have been impacted in terms of access to healthcare, lifestyle behaviours, and mental health.
- Given the reported increased risk for people from black and minority ethnic (BAME) backgrounds, the low recruitment of people from BAME backgrounds means that comparison of the impact on people of different ethnic backgrounds was not possible.

## Introduction

On 11<sup>th</sup> March 2020, the World Health Organization (WHO) announced that coronavirus disease 2019 (COVID-19) was a global pandemic.<sup>1</sup> In response, governments across the world took a range of actions to help reduce its spread including the development of legislation and policies. The majority of countries also imposed a period of a variable degree of “lockdown”.

Beyond the population level lockdown, further guidance was issued for people identified as at a higher risk of morbidity and mortality from COVID-19. This ‘high risk’ grouping was typically comprised of people living with chronic health conditions such as diabetes, heart disease or acquired immunodeficiency syndrome (AIDS), as well as people who are pregnant or aged 60 years or over. For some 2.2 million people, this additional guidance included the need to ‘shield’ for people identified as the most vulnerable to COVID-19 infection and illness.<sup>2</sup> However, unintended consequences have been noted in emerging evidence, including accentuated feelings of social isolation, self-stigma and loneliness.<sup>3,4</sup> Thus far, the impact of lockdown and associated restrictions have primarily been reported within the general population, however, given the greater restrictions on people identified as at higher risk including a longer duration of lockdown and need to ‘shield’ or self-isolate, the potential impact of COVID-19 is likely to have been greater on this sub-group of the population. Recently, the Office of National Statistics<sup>2</sup> reported that a high proportion of people identified as being at high risk self-reported that they followed the shielding guidance completely during lockdown.

There is a pressing need to investigate the impact of lockdown and shielding on people identified as at higher risk of severe illness from COVID-19. We defined impact as changes as a consequence of shielding to different aspects of everyday life, including actions and attitudes, healthcare delivery, mental health and wellbeing, lifestyle behaviours, and social interaction. Some of these aspects such as access to healthcare delivery, have not been investigated for this population previously. In terms of attitudes and actions, emerging evidence from the US suggests that despite concerns about infection, there was a lack of critical knowledge and limited changes to the plans or routines for people identified as at high risk of severe illness from COVID-19 infection.<sup>5</sup>

Therefore, to understand the impact, and contribute evidence for healthcare policy and networks to support people effectively and address unmet needs, we have delivered a time-sensitive study of the impact the COVID-19 pandemic and the associated UK Government guidance has had on people identified as at high risk of severe illness from COVID-19.

## Methods

### *Design*

Between 15 March and 31 May 2020, the Awareness, Attitudes and Actions (AAA) survey was disseminated via UK charities, healthcare and relevant higher education email distribution lists, social media, and website advertisement. The survey was hosted by Qualtrics LLC; a third-party online survey administration platform. Inclusion criteria was being aged  $\geq 18$  years with one or more of the factors for high risk of severe illness from COVID-19 identified by the UK Government or self-identified as at high risk due to an acute or chronic health condition not listed.<sup>6</sup>

### *AAA Survey*

An online survey was developed to explore the AAA of UK adults identified as at high risk of severe illness from COVID-19 by the UK Government or self-identified as high risk. The survey comprised of seven sections utilising a combination of closed and open questions:

- 1) participant demographics,
- 2) awareness, attitudes and actions relating to COVID-19 including whether participants had been diagnosed with COVID-19, experienced symptoms, and took actions to reduce infection and spread,
- 3) impact of COVID-19 on management of health conditions and use of technology,



1  
2  
3 4) impact on mental health and wellbeing, and depression including the Warwick-Edinburgh Mental  
4 Well-being Scale (WEMWBS)<sup>7</sup> and Patient Health Questionnaire (PHQ-9)<sup>8</sup>

5  
6 5) lifestyle related behaviours; diet, alcohol intake, physical activity type and amount, sleep quality and  
7 amount, smoking behaviour, e-cigarette use and recreational drug use,

8  
9 6) interaction with others regarding changes in other people's behaviour towards participants and  
10 feeling stigmatised and discriminated,

11 7) additional comments.

12 Please see Supplementary Table 1 for an overview of the online survey.

### 13 *Patient and Public Involvement*

14  
15  
16 Patients and Public were involved from the outset and throughout the study, including the design,  
17 conducting, choice, development and piloting of the AAA survey, recruitment and reporting of the  
18 study.

### 19 *Data analysis*

20  
21 Data from this survey produced quantitative and text data from validated questionnaires, and closed and  
22 open ended questions.

23  
24 For the statistical analysis, we fit generalised linear models of the data, and used logistic regression to  
25 model 1) actions taken to mitigate the risk of contracting COVID-19, 2) the impact of COVID-19 on  
26 the management of health conditions, and 3) the technology platforms used to receive healthcare.  
27 Responses regarding the impact of COVID-19 on lifestyle related behaviours were modelled using  
28 multinomial and Adjacent Category Logit models assuming proportional odds. Odds ratios and p-values  
29 were reported for logistic, multinomial, and Adjacent Category Logit models. All statistical analyses  
30 were performed using the tidyverse (version 1.3.0)<sup>9</sup> and VGAM (version 1.1-2)<sup>10</sup> packages in R (version  
31 3.6.2).<sup>11</sup> Statistical significance was defined at p-value <0.05.

32  
33 Text data was collected across 17 open-ended questions which were distributed throughout the survey  
34 sections. The language sample for each participant was processed to derive sentiment scores and  
35 personality scores. VADER Sentiment Analysis tool<sup>12</sup> was used to obtain sentiment scores (positive,  
36 neutral, negative, and compound sentiment). Personality scores were obtained using proprietary  
37 software by Scaled Insights. The software takes as input a language sample and produces 114  
38 personality features. Following this, the 118 features (114 personality, 4 sentiment) were used as  
39 input into the multiple machine learning models, which were used in two settings:  
40 unsupervised (clustering) and supervised (classification or regression).

41  
42 For further information the data analysis approach, see supplementary materials.

## 43 **Results**

### 44 *Descriptive Statistics*

45  
46  
47 The original sample comprised 1038 UK adults. Six participants were removed for either reporting  
48 being aged less than 18 years old or an infeasible age. Of the remaining sample, 624 were female, 402  
49 male, 4 reported other and 2 preferred not to say. Due to small numbers, participants who responded  
50 'other' or 'prefer not to say' when asked about their gender were removed. Characteristics of the 1026  
51 participants in the final analysis are presented in Table 1. Six hundred and twenty four (61%)  
52 participants were female; 979 (95.4%) identified as White-British, Irish, other; with a mean age of 54.6  
53  $\pm$  14.9 years and mean BMI of 28.8  $\pm$  8.1 kg/m<sup>2</sup>. Two hundred and nineteen participants (21.3%)  
54 reported having three or more indicators for high risk of severe illness from COVID-19 as identified by  
55 the UK Government, or based on individual perception due to an acute or chronic health condition. The  
56 12 high risk indicators are summarised in Table 1. Notably over half of the sample (n=528; 52.4%)  
57 reported that they were living with diabetes (either Type 1 or Type 2). Participants reported high concern  
58 about infection, illness and death, spread to others, and access to healthcare across all higher risk groups  
59  
60

1  
2  
3 (see supplementary materials for statistical analysis of COVID-19 concerns, risk mitigating behaviour  
4 and interactions with others).  
5  
6  
7  
8  
9  
10  
11  
12  
13  
14  
15  
16  
17  
18  
19  
20  
21  
22  
23  
24  
25  
26  
27  
28  
29  
30  
31  
32  
33  
34  
35  
36  
37  
38  
39  
40  
41  
42  
43  
44  
45  
46  
47  
48  
49  
50  
51  
52  
53  
54  
55  
56  
57  
58  
59  
60

For peer review only

**Table 1.** Demographics characteristics of participants in the AAA survey.

| <b>Participant Characteristics<sup>1</sup></b>                      |             |
|---------------------------------------------------------------------|-------------|
| <b>Age<sup>2</sup> mean (SD; years)</b>                             | 54.6 ±14.9  |
| <b>BMI<sup>2</sup> mean (SD; kg/m<sup>2</sup>; n = 1003)</b>        | 28.8 ± 8.1  |
| <b>Index of Multiple Deprivation<sup>2</sup> mean (SD, n = 759)</b> | 5.33 ± 2.7  |
| <b>Gender n (%)</b>                                                 |             |
| Male                                                                | 402 (39.2%) |
| Female                                                              | 624 (60.8%) |
| <b>Ethnicity n (%)</b>                                              |             |
| White - British, Irish, other                                       | 979 (95.4%) |
| Black/Black British - Caribbean, African, other                     | 8 (0.8%)    |
| Chinese/Chinese British                                             | 2 (0.2%)    |
| Middle Eastern/Middle Eastern British - Arab, Turkish, other        | 2 (0.2%)    |
| Mixed race -other                                                   | 5 (0.5%)    |
| Mixed race - White and Black/Black British                          | 3 (0.3%)    |
| Other ethnic groups                                                 | 7 (0.7%)    |
| <b>Health or social care worker (n=1025) n (%)</b>                  |             |
| Yes                                                                 | 150 (14.6%) |
| No                                                                  | 875 (85.3%) |
| <b>Job requires contact with COVID-19 patients (n=144) n (%)</b>    |             |
| Yes                                                                 | 39 (3.8%)   |
| No                                                                  | 105 (10.2%) |
| <b>Diabetes n (%)</b>                                               |             |
| Yes                                                                 | 538 (52.4%) |
| No                                                                  | 488 (47.6%) |
| <b>BMI ≥ 40 kg/m<sup>2</sup> n (%)</b>                              |             |
| Yes                                                                 | 142 (13.8%) |
| No                                                                  | 884 (86.2%) |
| <b>Chronic Respiratory Disease n (%)</b>                            |             |
| Yes                                                                 | 179 (17.4%) |
| No                                                                  | 847 (82.6%) |
| <b>Chronic Heart Disease n (%)</b>                                  |             |
| Yes                                                                 | 132 (12.9%) |

|    |                                              |              |
|----|----------------------------------------------|--------------|
| 1  |                                              |              |
| 2  |                                              |              |
| 3  | No                                           | 894 (87.1%)  |
| 4  |                                              |              |
| 5  | <b>Chronic Kidney Disease n (%)</b>          |              |
| 6  | Yes                                          | 147 (14.3%)  |
| 7  | No                                           | 879 (85.7%)  |
| 8  |                                              |              |
| 9  |                                              |              |
| 10 | <b>Chronic Liver Disease n (%)</b>           |              |
| 11 | Yes                                          | 49 (4.8%)    |
| 12 | No                                           | 977 (95.2%)  |
| 13 |                                              |              |
| 14 |                                              |              |
| 15 | <b>Chronic Neurological Conditions n (%)</b> |              |
| 16 | Yes                                          | 35 (3.4%)    |
| 17 | No                                           | 991 (96.6%)  |
| 18 |                                              |              |
| 19 |                                              |              |
| 20 | <b>Spleen problems n (%)</b>                 |              |
| 21 | Yes                                          | 16 (1.6%)    |
| 22 | No                                           | 1010 (98.4%) |
| 23 |                                              |              |
| 24 |                                              |              |
| 25 | <b>Weakened immune system n (%)</b>          |              |
| 26 | Yes                                          | 159 (15.5%)  |
| 27 | No                                           | 867 (84.5%)  |
| 28 |                                              |              |
| 29 |                                              |              |
| 30 | <b>Aged &gt; 70 years n (%)</b>              |              |
| 31 | Yes                                          | 178 (17.3%)  |
| 32 | No                                           | 848 (82.7%)  |
| 33 |                                              |              |
| 34 |                                              |              |
| 35 | <b>Pregnant n (%)</b>                        |              |
| 36 | Yes                                          | 21 (2.0%)    |
| 37 | No                                           | 1005 (98.0%) |
| 38 |                                              |              |
| 39 |                                              |              |
| 40 | <b>Other risk factors* n (%)</b>             |              |
| 41 | Yes                                          | 303 (29.5%)  |
| 42 | No                                           | 723 (70.5%)  |
| 43 |                                              |              |
| 44 |                                              |              |
| 45 | <b>Number of high-risk groups n (%)</b>      |              |
| 46 | 1                                            | 471 (45.9%)  |
| 47 | 2                                            | 336 (32.7%)  |
| 48 | 3+                                           | 219 (21.3%)  |
| 49 |                                              |              |
| 50 |                                              |              |
| 51 |                                              |              |
| 52 |                                              |              |
| 53 |                                              |              |

*1. n = 1026 except where otherwise specified; 2. Mean and standard deviation; SD=standard deviation; N=number; %=percentage*

*\* Short or long term health conditions e.g. mental health*

### *Impact of COVID-19 on Lifestyle Related Behaviours*

Supplementary Figures 7-12 display the impact of COVID-19 on lifestyle related behaviours for each high-risk indicator of severe illness from COVID-19. Generally, across all high-risk indicators a high proportion of participants indicated little to moderate change in diet, no change in alcohol consumption, less or much less physical activity, no change in the type of physical activity, and a great deal of change in shopping habits. Change in quality and amount of sleep was variable across risk groups.

Further analysis of lifestyle related behaviours compared to prior to COVID-19 lockdown suggested that women and participants with CKD were more likely to report greater change in their shopping habits (OR 1.18 and 1.62;  $p = 0.030$  and  $0.047$ , respectively). Older participants were less likely to report greater changes in their diet (OR 0.99 per additional year of age;  $p = 0.013$ ), whereas participants with higher BMI and women reported greater change in their diet (OR 1.02 per additional  $\text{kg}/\text{m}^2$  and OR 1.19;  $p = 0.008$  and  $0.027$ , respectively). Furthermore, participants with either chronic respiratory disease, CKD, weakened immune systems, or a higher BMI were less likely to report greater change in the amount of physical activity they engaged in (OR 0.70, 0.65, 0.54, and 0.98 per additional  $\text{kg}/\text{m}^2$ ;  $p = 0.035$ ,  $0.029$ ,  $0.001$ ,  $0.009$  respectively). In addition, though older participants were less likely to report a change in the type of physical activity they engaged in (OR 0.98 per additional year of age;  $p = 0.020$ ), participants with weakened immune systems were more likely to indicate change in type of physical activity (OR 3.17;  $p = 0.012$ ).

### *Impact of COVID-19 on Mental Health, Wellbeing & Depression*

Four hundred and forty-five (49.8%) participants indicated that their self-reported mental health was about the same compared to prior to COVID-19 lockdown (Table 2). Women were more likely to report worsening of their mental health (OR 2.09;  $p = 0.044$ ) whereas participants  $> 70$  years old were less likely to report worsening of their mental health (OR 0.16;  $p = 0.032$ ). Specifically, for each additional year in age, participants were more likely to report that their mental health had been impacted less negatively during COVID-19 lockdown (OR 1.04,  $p = 0.008$ ).

For all participants, mean wellbeing (WEMWBS) was  $44.9 \pm 11.3$  – lower than the population wellbeing norm – and participants on average reported mild depression (PHQ-9) of  $7.53 \pm 6.11$ .

#### *Wellbeing*

Participants who were older reported statistically higher wellbeing (WEMWBS). For each additional year, wellbeing increased by 0.25 ( $p < 0.001$ ). By contrast, women reported wellbeing that was 1.75 lower than those of men ( $p = 0.048$ ).

#### *Depression*

Pregnant women and older participants reported lower depression (PHQ-9), with pregnant women reporting scores 4.41 points lower than women who were not pregnant ( $p = 0.013$ ), whereas for each additional year in age there was a reduction in depression by 0.14 points ( $p < 0.001$ ). In addition, participants' weight impacted depression, with each unit increase in BMI, there was an increase of depression by 0.09; gender impacted depression with women reporting an average depression score that was 1.41 points higher than men; and participants with three or more indicators of high-risk reported greater depression with a mean increase of 4.78 compared to those with only one high-risk indicator ( $p < 0.05$  for all factors).

**Table 2.** Summary of Warwick-Edinburgh Mental Well-being Scale (WEMWBS) and Patient Health Questionnaire (PHQ-9) scores and changes in self-reported mental health compared to pre-COVID-19.

---

**Participant response**


---

|                                                             |             |
|-------------------------------------------------------------|-------------|
| <b>WEMWBS<sup>1</sup> (n = 922)</b>                         | 44.9 ± 11.3 |
| <b>PHQ-9<sup>1</sup> (n = 927)</b>                          | 7.53 ± 6.11 |
| <b>Mental health changes since COVID-19 (n = 893) n (%)</b> |             |
| Worse                                                       | 397 (44.5%) |
| About the same                                              | 445 (49.8%) |
| Better                                                      | 51 (5.7%)   |

---

*1. Mean and standard deviation*
*Impact on Management of Health Conditions and Use of Technology*

The impact of COVID-19 on the delivery of care for those with high-risk indicators is summarised in Table 3. Six hundred and eighty-two (66.5%) participants indicated changes to their regular healthcare appointments, while 199 (19.4%) participants indicated that there were no changes to regular healthcare support during the COVID-19 lockdown.

Participants with chronic liver disease were more likely to report change to management of health conditions compared to prior to the COVID-19 lockdown (OR 3.15,  $p = 0.014$ ). Participants with either diabetes, weakened immune systems or liver disease were more likely to report change to appointments (OR 2.40, 2.90, 3.48, ;  $p = 0.036, 0.028, \text{ and } 0.036$ , respectively); whereas participants with spleen problems had a greater likelihood of reporting changes to their medications (OR 7.10;  $p = 0.026$ ). Older participants were more likely to report changes to elective surgery and their clinician (OR 1.03 and 1.03 for each additional year in age;  $p = 0.016$  and  $0.005$ , respectively). However, participants who were > 70 years old were less likely to report other changes to regular healthcare support beyond those specified in the survey (OR 0.24;  $p = 0.042$ ).

Four hundred and sixty-seven (45.5%) participants indicated that their care changed to using telephone support, while 321 (31.3%) reported that they did not use any of the platforms specified in the survey (Table 3). Participants > 70 years were less likely to use the telephone to receive care (OR 0.46 and  $p = 0.048$ ). Participants living with diabetes or with liver disease were more likely to use social media (OR 2.82 and 5.91;  $p = 0.050$  and  $0.006$ , respectively). In addition, participants with liver disease were more likely to report using virtual consultation platforms; as were participants with neurological conditions (OR 4.39 and 3.56;  $p = 0.009$  and  $0.031$ , respectively). By contrast, women were less likely to use virtual consultation platforms compared to men (OR 0.56;  $p = 0.041$ ). Participants with neurological conditions were more likely to indicate that they used email to receive care, while those >70 years were less likely to use emails (OR 2.88 and 0.98 for each additional year in age;  $p = 0.048$  and  $0.030$ , respectively). When asked whether participants were satisfied with the support platforms and with the information received during the COVID-19 lockdown, the majority reported either being somewhat or extremely satisfied (40.3%, 39.6%, respectively; Table 3).

Four hundred and sixty-six (45.4%) participants indicated that they would welcome continued use of the platforms used during COVID-19 lockdown. When comparing gender, women were less satisfied with the platform they used (OR 0.84;  $p = 0.034$ ); however, the level of satisfaction with using the information provided through the platform was similar across all groups. Age appeared to impact whether participants wished to continue to use the healthcare platform after COVID-19 lockdown (OR 1.03 for each additional year of age,  $p = 0.004$ ). While those with greater social deprivation appeared to be unsure about continuing to use the platform (OR 1.10 for each increased in IMD,  $p = 0.011$ ).

**Table 3.** Summary of participant changes to clinical management during COVID-19 lockdown.

|                                                                                           | <b>Percent Identifying<br/>(n = 1026)</b> |
|-------------------------------------------------------------------------------------------|-------------------------------------------|
| <b>Changes to regular healthcare support?* n (%)</b>                                      |                                           |
| Appointments                                                                              | 682 (66.5%)                               |
| Medication                                                                                | 292 (28.5%)                               |
| Elective surgery                                                                          | 122 (11.9%)                               |
| Communication platform                                                                    | 183 (17.8%)                               |
| Clinician                                                                                 | 196 (19.1%)                               |
| Other                                                                                     | 83 (8.1%)                                 |
| No change                                                                                 | 199 (19.4%)                               |
| <b>Platforms used to receive care n (%)</b>                                               |                                           |
| Social media                                                                              | 63 (6.1%)                                 |
| Mobile phone app                                                                          | 97 (9.5%)                                 |
| Email                                                                                     | 146 (14.2%)                               |
| Telephone                                                                                 | 467 (45.5%)                               |
| Virtual consultation                                                                      | 90 (8.8%)                                 |
| Other                                                                                     | 46 (4.5%)                                 |
| No platforms                                                                              | 321 (31.3%)                               |
| Face to face care                                                                         | 35 (3.4%)                                 |
| <b>How satisfied are you with the platforms? (n=860) n (%)</b>                            |                                           |
| Extremely dissatisfied                                                                    | 51 (5.0%)                                 |
| Somewhat dissatisfied                                                                     | 92 (9.0%)                                 |
| Neither satisfied nor dissatisfied                                                        | 303 (29.5%)                               |
| Somewhat satisfied                                                                        | 234 (22.8%)                               |
| Extremely satisfied                                                                       | 180 (17.5%)                               |
| <b>How satisfied are you with using information received via platforms? (n=867) n (%)</b> |                                           |
| Extremely dissatisfied                                                                    | 41 (4.0%)                                 |
| Somewhat dissatisfied                                                                     | 114 (11.1%)                               |
| Neither satisfied nor dissatisfied                                                        | 306 (29.8%)                               |
| Somewhat satisfied                                                                        | 255 (24.9%)                               |
| Extremely satisfied                                                                       | 151 (14.7%)                               |

### Use platforms after COVID-19? (n = 875) n (%)

|                                        |             |
|----------------------------------------|-------------|
| No                                     | 154 (15.0%) |
| No, but would welcome other platforms  | 81 (7.9%)   |
| Not sure, I need more time to use them | 174 (17.0%) |
| Yes                                    | 466 (45.4%) |

*n = 1026 except where otherwise specified.*

*\* Changed type or frequency of support*

## Exploration and Prediction using Text-Derived Features

### Clustering

The personality and sentiment features were used as input to a clustering algorithm ( $k$ -means) in order to separate survey participants into groups. As the  $k$ -means algorithm requires to specify the number of clusters, we first experimented with different values of  $k$  (between 2 and 10). We used two heuristics (sum of squared distance and an elbow plot, and degree of separation between clusters and a silhouette plot) to evaluate which  $k$  value resulted in most coherent and disparate clusters. According to both heuristics, two clusters resulted in the best differentiation: the first cluster with 335 participants and second with 301 participants (see Figure 3 for a visualisation of the clusters). Table 4 lists the ten most differentiating features and the cluster centroid values. The first cluster had a negative compound sentiment score and higher values for neuroticism, insecurity, 'Type A' personality (i.e. more competitive and ambitious), aggression, stress, and coldness, while the second cluster had a positive compound sentiment score and higher values for dutifulness, cooperation, and social skills. From here on in, the first cluster is referred to as the Negative Cluster, and the second cluster as the Positive Cluster.

**Figure 3.** Visualisation of clusters using Principal Component Analysis (PCA).

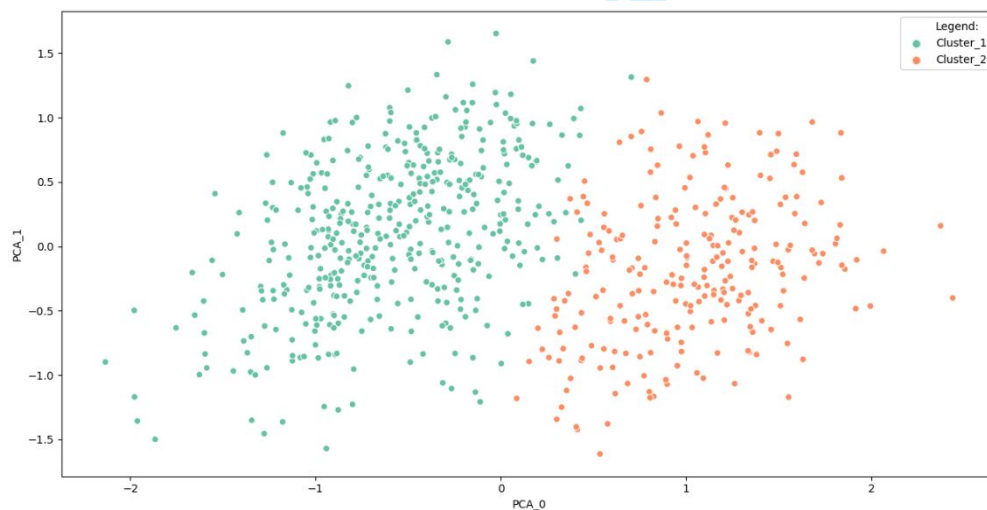



**Table 4.** Cluster centroids for the ten features with greatest absolute value differences between clusters. All scores are within [0, 1] range with the exception of compound sentiment score which uses [-1, 1] range.

| Feature                    | Negative Cluster | Positive Cluster |
|----------------------------|------------------|------------------|
| Sentiment (compound score) | -0.75            | 0.62             |
| Neurotic                   | 0.85             | 0.61             |
| Insecure                   | 0.73             | 0.50             |
| 'Type A'                   | 0.34             | 0.15             |
| Aggressive                 | 0.53             | 0.34             |
| Dutiful                    | 0.50             | 0.69             |
| Cooperative                | 0.58             | 0.75             |
| Stressed                   | 0.81             | 0.64             |
| Cold                       | 0.62             | 0.46             |
| Social skills              | 0.13             | 0.29             |

The study investigated whether the two clusters had differed in their responses (Table 5). There were no significant differences in how the two clusters took mitigating actions to avoid infection from COVID-19. However, participants in the Negative Cluster rated their concerns significantly higher than the Positive Cluster in five out of six cases; with the only concern showing no difference was about spreading COVID-19 to others. In terms of lifestyle behaviours, Negative Cluster reported greater impact on diet and sleep, and less physical activity than before COVID-19 lockdown. Negative Cluster also scored significantly worse for depression and psychological wellbeing. In terms of changes to healthcare support, Negative Cluster reported more often change to their appointments and using telephone appointments, while Positive Cluster reported no change to healthcare support, and lower satisfaction with platforms used to receive care and with the information and resources presented within them.

**Table 5.** Comparison between clusters of actions, concerns, lifestyle behaviours, depression and wellbeing scores, impact on health management, and use of platforms for health management. Numeric variables were compared using *t*-test, binary variables were compared using proportions *z*-test. Test results and *p*-values were rounded to two decimal places.

|                  |                                             | Negative Cluster | Positive Cluster | Test result | <i>p</i> -value |
|------------------|---------------------------------------------|------------------|------------------|-------------|-----------------|
| <b>Actions</b>   | Social distancing                           | 303              | 188              | 0.83        | 0.41            |
|                  | Self-isolation                              | 202              | 104              | -1.72       | 0.09            |
|                  | Wearing protective apparel                  | 127              | 81               | 0.55        | 0.58            |
|                  | Online shopping                             | 187              | 117              | 0.53        | 0.60            |
|                  | Shielding                                   | 109              | 64               | -0.14       | 0.89            |
|                  | All above                                   | 51               | 26               | -0.71       | 0.48            |
| <b>Concerns</b>  | Becoming infected                           | 7.72             | 7.05             | -3.29       | 0               |
|                  | Severe illness or death                     | 7.88             | 7.25             | -2.82       | 0.01            |
|                  | Spreading COVID-19 to others                | 7.12             | 6.76             | -1.44       | 0.15            |
|                  | Access to healthcare                        | 6.06             | 4.97             | -4.28       | 0               |
|                  | Appropriate care if infected                | 6.88             | 5.76             | -4.22       | 0               |
|                  | Worse care compared to low-risk individuals | 6.02             | 5.05             | -3.23       | 0               |
| <b>Lifestyle</b> | Shopping                                    | 3.31             | 3.22             | -1.16       | 0.25            |
|                  | Diet                                        | 1.75             | 1.41             | -3.72       | 0               |
|                  | Alcohol consumption                         | 0.05             | 0.09             | 0.62        | 0.53            |

|                                       |                                    |       |       |       |      |
|---------------------------------------|------------------------------------|-------|-------|-------|------|
|                                       | Physical activity (amount)         | -0.78 | -0.28 | 5.25  | 0    |
|                                       | Physical activity(type)            | 0.75  | 0.78  | 0.8   | 0.43 |
|                                       | Sleep                              | 1.93  | 1.37  | -5.15 | 0    |
|                                       | Smoking (indicated yes)            | 0.05  | 0.01  | -2.81 | 0.01 |
|                                       | Smoking (impact)                   | 0.15  | 0     | -0.16 | 0.87 |
|                                       | E-cigarettes (indicated yes)       | 0.04  | 0.03  | -1.14 | 0.25 |
|                                       | E-cigarettes (impact)              | 0.53  | 0.33  | -0.48 | 0.64 |
|                                       | Recreational drugs (indicated yes) | 0.02  | 0.02  | -0.07 | 0.94 |
|                                       | Recreational drugs (impact)        | 0.29  | 0     | -0.37 | 0.72 |
| <b>Depression</b>                     | PHQ-9 score                        | 9.16  | 5.49  | -7.63 | 0    |
| <b>Wellbeing</b>                      | WEMWBS score                       | 42.23 | 49.36 | 8.29  | 0    |
| <b>Change to healthcare support</b>   | General management                 | 398   | 237   | -1.29 | 0.2  |
|                                       | Appointments                       | 311   | 161   | -2.93 | 0    |
|                                       | Medication                         | 146   | 75    | -1.33 | 0.19 |
|                                       | Elective surgery                   | 50    | 36    | 0.91  | 0.36 |
|                                       | Communications platform            | 84    | 44    | -0.8  | 0.43 |
|                                       | Clinician                          | 91    | 50    | -0.55 | 0.59 |
|                                       | Other                              | 50    | 21    | -1.45 | 0.15 |
|                                       | No change                          | 55    | 60    | 3.61  | 0    |
| <b>Platforms used to receive care</b> | Social media                       | 23    | 19    | 1.08  | 0.28 |
|                                       | Mobile phone app                   | 34    | 34    | 2.27  | 0.02 |
|                                       | Email                              | 60    | 35    | -0.13 | 0.90 |
|                                       | Telephone                          | 219   | 111   | -2.05 | 0.04 |
|                                       | Virtual consultation               | 43    | 23    | -0.46 | 0.65 |
|                                       | Other                              | 18    | 18    | 1.61  | 0.11 |
|                                       | No new platforms                   | 118   | 79    | 0.94  | 0.35 |
|                                       | Still face-to-face                 | 18    | 9     | -0.45 | 0.65 |
|                                       | Satisfied with platforms           | 0.39  | 0.7   | 3.32  | 0    |
|                                       | Satisfied with information         | 0.33  | 0.64  | 3.46  | 0    |
|                                       | Continue using in the future       | 186   | 124   | 1.31  | 0.19 |

## Discussion

This study provides the essential evidence to start addressing the dearth of detailed information regarding the impact of COVID-19 on the 2.2 million people identified at higher risk of severe illness from COVID-19 and advised to shield during lockdown.

During the COVID-19 lockdown, the management of health conditions amongst people identified as at high risk of severe illness changed. Nearly half of the sample reported using telephone care, with people aged 70 years or over less likely to use telephone care. People living with diabetes and liver disease reported the greatest use of social media, while people living with chronic liver disease and neurological conditions were most likely to use virtual consultations. The majority of participants reported that they were satisfied with the new platforms and the information provided to manage their health conditions, and importantly would welcome continued use. Notably, people living in higher deprivation reported greater uncertainty about continued use which may identify concerns regarding internet poverty and inability to access digital care within this community. It is imperative that new technologies for supporting people living with health conditions are accessible for all, and does not disproportionately impact subgroups of the population and potentially widen health inequalities. Indeed, the higher prevalence of chronic health conditions amongst people living in more deprived communities, and the disproportionate impact of COVID-19 infection on people living in poorer communities, highlights the

1  
2  
3 need to address these concerns or uncertainty, given the likelihood of continued short- and long-term  
4 use of new technologies to support patient care.

5  
6 Emerging evidence has demonstrated that the COVID-19 lockdown and restrictions have impacted  
7 lifestyle behaviours such as decrease in physical activity and sleep deprivation, although this has  
8 predominantly focussed on the general population.<sup>13,14</sup> Current study findings provide novel evidence  
9 about the impact on people identified as at high risk of severe illness from COVID-19 infection, and  
10 thus, people who have needed to follow greater restrictions. The study findings demonstrated that whilst  
11 the type of physical activity typically did not change across the groups, the amount of physical activity  
12 decreased substantially. People with a higher BMI reported reductions in physical activity amount, as  
13 well as increased changes to their diet, which may have placed this group at greater risk of weight gain  
14 and worsening health. Reductions in physical activity were also observed for people with chronic  
15 respiratory disease, CKD and weakened immune system, which would be consistent with those who  
16 may have avoided venturing outside due to risk of COVID-19 infection. Across all groups, people  
17 reported that their sleep quality and amount was impacted.

18  
19 As the pandemic has progressed, a greater emphasis has been placed on the impact that lockdown,  
20 restrictions on daily life including meeting with significant others, the loss of loved ones, the loss of  
21 work and others have had on mental health. This study demonstrates that for the majority of the sample,  
22 the pandemic has led to worse mental health, with only 6% reporting an improvement. This was greater  
23 than the 35% of vulnerable people reporting worse mental health from the Office of National Statistics.<sup>2</sup>  
24 This may have been due to population differences but overall represents a consistent message that  
25 lockdown had a negative impact on people's self-reported mental health. In alignment, mean wellbeing  
26 was lower than the national average,<sup>15</sup> and depression was higher than that found in a general population  
27 sample from the COVID-19 Social Study.<sup>16</sup> The statistical analysis demonstrates that young women  
28 who are at risk of severe illness from COVID-19 report that their mental health has been most negatively  
29 impacted, have lower wellbeing and higher depression. This is consistent with other data showing that  
30 depression was higher in young people,<sup>16</sup> suggesting that the lockdown restrictions has more negatively  
31 impacted younger people and requires greater consideration. Moreover, people with a higher BMI or  
32 with multiple risk factors reported the highest depression, which may well be expected given the link  
33 between obesity and depression.<sup>17</sup> Given that this study highlights the impact of the COVID-19  
34 pandemic on the mental health of people identified as at high risk of severe illness, policymakers,  
35 community groups, and health charities should consider how and in what ways they can best support or  
36 refer people whose mental health may have been compromised – which for many may go above and  
37 beyond their usual activities. This may involve policymakers considering how and in what ways to  
38 support in particular health charities to provide this care given economic challenges facing many during  
39 the pandemic and the reduction in access to clinical services.

40  
41 Artificial Intelligence methods were applied to the data to consider how intrinsic factors, specifically  
42 personality and sentiment, derived from language samples could provide additional insights into  
43 people's actions and attitudes relating to COVID-19. Based on those intrinsic factors, the participants  
44 clustered into two groups. Crucially, the two groups differed significantly in their responses. Compared  
45 to the Positive Cluster (with higher dutifulness and cooperation scores and positive sentiment), the  
46 Negative Cluster had higher neuroticism, insecurity score and negative sentiment and reported higher  
47 levels of concern, greater negative impact on lifestyle behaviours, higher depression and lower  
48 wellbeing, alongside lower satisfaction with platforms used to deliver their healthcare during COVID-  
49 19. Furthermore, when predicting actions or attitudes for individuals, word vectors (features derived  
50 from language samples) achieved fairly good to good prediction performance (between 0.7 and 0.8  
51 AUROC). On the other hand, personality and sentiment features were better predictors of depression  
52 and wellbeing than word vectors. Overall, current study data suggests that analysing language samples  
53 using Artificial Intelligence could yield useful insights into people's attitudes and actions relating to  
54 COVID-19 and effectively identify individuals at higher risk. Future work can explore the feasibility of  
55 using these methods as a preventative support measure, by using them within a digital environment to  
56 identify whether someone is likely to be more significantly impacted and offer them appropriate  
57 support.  
58  
59  
60

1  
2  
3 This study is not without limitations. First, it provides a cross-sectional analysis, and as such informs  
4 about the COVID-19 lockdown period. Nevertheless, this study provides much needed insights about a  
5 subsection of the population who have been subject to greater restrictions and as the findings  
6 demonstrate, have been impacted in terms of access to healthcare, lifestyle behaviours, and mental  
7 health. Second, due to the recruitment methods, the sample was not totally representative, and would  
8 not have recruited people experiencing digital poverty. Finally, given the reported increased risk for  
9 people from black and minority ethnic (BAME) backgrounds, the low recruitment of people from  
10 BAME backgrounds means that comparison of the impact on people of different ethnic backgrounds  
11 was not possible.  
12

13 Further research to assess the longer term impact of COVID-19 on people identified at high risk is  
14 needed. This research should provide insights into the longer term changes to healthcare access,  
15 provision and support, and where relevant, how technological platforms have facilitated continued care.  
16 This study demonstrated the adults identified as at high risk of severe illness from COVID-19 reported  
17 lower wellbeing, that their mental health had worsened and varied levels of depression. Given the  
18 continued restrictions for many people within this population subgroup, and thus the associated impact  
19 on other areas of life including employment, future research should assess the longer term impact on  
20 mental health. Indeed, it might be argued that people with mental health concerns may also be at high  
21 risk from the impact of COVID-19 and as such, appropriate measures and support made available.  
22 Finally, research is also needed to understand the impact of delayed healthcare support such as elective  
23 surgery.  
24  
25  
26

## 27 **Conclusions**

28 This study provides novel insights into the awareness, attitudes and actions of UK adults identified as  
29 at high risk of severe illness from COVID-19. In particular, this study demonstrates that the pandemic  
30 has impacted people's access to healthcare support, lifestyle behaviours and mental health.  
31 Furthermore, the use of an innovative Artificial Intelligence tool has demonstrated the advanced insights  
32 that can be gleaned from patient language samples to predict behaviours and health outcomes in  
33 response to the COVID-19 pandemic. This has the potential to enable clinicians to identify people at  
34 greater risk and highlights the value of using Artificial Intelligence within healthcare, particularly  
35 during the COVID-19 pandemic.  
36

37 As such, there are important implications for policy makers, healthcare and clinical practice as well as  
38 healthcare technology companies. Working with adults identified as at high risk of severe illness from  
39 COVID-19, action is needed that aims to address issues relating to access to healthcare, attitudes  
40 towards use of technological platforms and to support people's mental health. The findings demonstrate  
41 that healthcare access and support has been significantly impacted, that their lifestyle related behaviours  
42 have changed and that mental health has worsened. It is paramount to not only understand but take  
43 actions to reduce any potential unintended consequences of the restrictions placed on daily life, which  
44 may avoid exacerbating physical and mental health concerns.  
45  
46  
47  
48  
49  
50  
51  
52  
53  
54  
55  
56  
57  
58  
59  
60

## References

1. World Health Organization. 2020. WHO Director-General's opening remarks at the media briefing on COVID-19 - 11 March 2020. <https://www.who.int/dg/speeches/detail/who-director-general-s-opening-remarks-at-the-media-briefing-on-covid-19---11-march-2020> [Last accessed August 25 2020].
2. Office of National Statistics. Coronavirus and shielding of clinically extremely vulnerable people in England: 29 May to 3 June 2020. 2020. <https://www.ons.gov.uk/peoplepopulationandcommunity/healthandsocialcare/conditionsanddiseases/bulletins/coronavirusandshieldingofclinicallyextremelyvulnerablepeopleinengland/28mayto3june2020> [Last accessed 06 September 2020].
3. Luchetti M, Lee JH, Aschwanden D, Sesker A, Strickhouser JE, Terracciano A, Sutin AR. The trajectory of loneliness in response to COVID-19. *American Psychologist*. 2020 Jun 22.
4. Tull MT, Edmonds KA, Scamaldo K, Richmond JR, Rose JP, Gratz KL. Psychological Outcomes Associated with Stay-at-Home Orders and the Perceived Impact of COVID-19 on Daily Life. *Psychiatry research*. 2020 May 12:113098.
5. Wolf MS, Serper M, Opsasnick L, O'Connor RM, Curtis LM, Benavente JY, Wismer G, Batio S, Eifler M, Zheng P, Russell A. Awareness, attitudes, and actions related to COVID-19 among adults with chronic conditions at the onset of the US outbreak: a cross-sectional survey. *Annals of internal medicine*. 2020 Apr 9.
6. Public Health England. Guidance on social distancing for everyone in the UK. 2020. <https://www.gov.uk/government/publications/covid-19-guidance-on-social-distancing-and-for-vulnerable-people/guidance-on-social-distancing-for-everyone-in-the-uk-and-protecting-older-people-and-vulnerable-adults> [Last accessed August 26 2020].
7. Tennant R, Hiller L, Fishwick R, Platt S, Joseph S, Weich S, Parkinson J, Secker J, Stewart-Brown S. The Warwick-Edinburgh mental well-being scale (WEMWBS): development and UK validation. *Health and Quality of life Outcomes*. 2007 Dec;5(1):63.
8. Kroenke K, Spitzer RL. The PHQ-9: a new depression diagnostic and severity measure. *Psychiatric annals*. 2002 Sep 1;32(9):509-15.
9. Wickham H, Averick M, Bryan J, Chang W, McGowan LD, François R, Grolemund G, Hayes A, Henry L, Hester J, Kuhn M. Welcome to the Tidyverse. *Journal of Open Source Software*. 2019 Nov 21;4(43):1686.
10. Yee TW. Complements to Vector Generalized Linear and Additive Models. R package version 1.1-3.
11. R: A language and environment for statistical computing. R Foundation for Statistical Computing, Vienna, Austria. 2019. URL <https://www.R-project.org/>
12. Gilbert CH, Hutto E. Vader: A parsimonious rule-based model for sentiment analysis of social media text. In Eighth International Conference on Weblogs and Social Media (ICWSM-14). Available at (20/04/16) <http://comp.social.gatech.edu/papers/icwsm14.vader.hutto.pdf> 2014 Jun (Vol. 81, p. 82).
13. Hamer M, Kivimäki M, Gale CR, Batty GD. Lifestyle risk factors, inflammatory mechanisms, and COVID-19 hospitalization: A community-based cohort study of 387,109 adults in UK. *Brain, Behavior, and Immunity*. 2020 May 23.
14. Obesity Action Scotland (2020) Lifestyle of Scotland's People Since the Coronavirus Outbreak <https://www.obesityactionsotland.org/publications/reports/lifestyle-of-scotland-s-people-since-the-coronavirus-outbreak-polling-results/> [Last Accessed 13 September 2020]
15. NHS Digital (2017) Health Survey for England 2016: Well-being and mental health (Version 2, Published 27<sup>th</sup> November 2019) <https://digital.nhs.uk/data-and->

[information/publications/statistical/health-survey-for-england/health-survey-for-england-2016](https://www.gov.uk/government/publications/statistical/health-survey-for-england/health-survey-for-england-2016)  
[Last Accessed 13 September 2020]

16. Fancourt, D., Bu, Feifei, Wan Mak, H. Steptoe A. (2020) COVID-19 Social Study, Results, 2020. <https://www.covidsocialstudy.org/results> [Last accessed 13 September, 2020].

### **Acknowledgements**

We would like to acknowledge and thank the following organisations for disseminating the survey.

APPG Obesity  
APPG Medical Research  
Anticoagulation UK  
Association for Medical Research Charities  
Asthma UK  
Blackpool, Fylde & Wyre haemochromatosis Support Group  
British Dietetics Association  
British Liver Trust  
British Lung Foundation  
Diabetes UK  
Elton John AIDS Foundation  
European Association for the Study of Obesity  
Hepatitis C Trust  
Kidney Care UK  
JDRF  
Leeds Academic Health Partnership  
LIVERNORTH  
Melanoma UK  
MS Society  
Nexus Leeds  
Norfolk & Norwich Liver Group  
Obesity UK  
Parkinson's Society  
PBC Foundation  
Public Health Scotland  
Research for the Future  
Salford Sickle Cell Society  
Terrance Higgins Trust  
The Somerville Foundation  
Yorkshire Cancer Community

### **Contributorship Statement**

SWF conceived the study. SWF, AB and AT contributed to the study design and methodology. SWF was responsible for the oversight of the study. SWF, AB & AT contributed to the recruitment of participants. AP & ACJ were responsible for data analysis. All authors contributed to data interpretation, and the writing of the manuscript. All authors contributed to critical revision of the manuscript for important intellectual content and gave final approval.

### **Declaration of Interest**

SWF & AP are employed by Scaled Insights.

### **Data sharing statement**

1  
2  
3 De-identified participant data that underlie the results reported in this manuscript will be made available  
4 on publication and ending 5 years after publication. Proposals should be made to the corresponding  
5 author and will require a data access agreement.  
6  
7

### 8 **Funding**

9 This study was partly supported by an investigator-initiated grant from Ethicon, J&J; the funder had no  
10 role in study design, data analysis, data interpretation, or writing of the report.  
11  
12

### 13 **Ethical Approval**

14  
15 The study was granted ethical approval by the School of Psychology Research Ethics Committee at  
16 University of Leeds (REC number PSYC-28).  
17  
18

### 19 **Patient and Public Involvement**

20  
21 Patients and Public were involved from the outset and throughout the study, including the design,  
22 conducting, choice, development and piloting of the AAA survey, recruitment and reporting of the  
23 study. We are very grateful for the organisations and individuals as listed in our acknowledgements  
24 section who have and continue to support this study.  
25

26 A public facing report of the study will be provided to the organisations that have supported our study  
27 once the manuscript has been published, and all study participants are able to request a copy of the final  
28 report and manuscript once published.  
29  
30  
31  
32  
33  
34  
35  
36  
37  
38  
39  
40  
41  
42  
43  
44  
45  
46  
47  
48  
49  
50  
51  
52  
53  
54  
55  
56  
57  
58  
59  
60

**Supplementary materials**

1. Awareness, Attitudes and Actions (AAA) survey
2. Supplementary data analysis
3. Stats tables and figures
4. AI prediction models

For peer review only



## Awareness, Attitudes and Actions (AAA) survey

| Survey questions                                                | Response categories/instruction                                                                                                                                                                                                                                                                                                                                                                                                                                                                                                                                                                                                                                                                                                                                                                                                                                       |
|-----------------------------------------------------------------|-----------------------------------------------------------------------------------------------------------------------------------------------------------------------------------------------------------------------------------------------------------------------------------------------------------------------------------------------------------------------------------------------------------------------------------------------------------------------------------------------------------------------------------------------------------------------------------------------------------------------------------------------------------------------------------------------------------------------------------------------------------------------------------------------------------------------------------------------------------------------|
| <b>Section A: demographics</b>                                  |                                                                                                                                                                                                                                                                                                                                                                                                                                                                                                                                                                                                                                                                                                                                                                                                                                                                       |
| Does any of the following apply to you? (select all that apply) | Diabetes (Type 1 or 2)<br>A body mass index (BMI) of 40 or above<br>Chronic (long-term) respiratory diseases, such as asthma, chronic obstructive pulmonary disease (COPD), emphysema or bronchitis<br>Chronic heart disease, such as heart failure<br>Chronic kidney disease<br>Chronic liver disease, such as hepatitis<br>Chronic neurological conditions, such as Parkinson's disease, motor neurone disease, multiple sclerosis (MS), a learning disability or cerebral palsy<br>Problems with your spleen – for example, sickle cell disease or if you have had your spleen removed<br>A weakened immune system as the result of conditions such as HIV and AIDS, or medicines such as steroid tablets or chemotherapy<br>None of these apply to me<br>I have a different long term health condition not listed above (please specify in the text box provided) |
| Please state your age                                           | Textbox                                                                                                                                                                                                                                                                                                                                                                                                                                                                                                                                                                                                                                                                                                                                                                                                                                                               |
| Gender                                                          | Male<br>Female<br>Other (textbox)<br>Prefer not to say                                                                                                                                                                                                                                                                                                                                                                                                                                                                                                                                                                                                                                                                                                                                                                                                                |
| What is your ethnicity?                                         | White – British, Irish, other<br>Asian/Asian British – Indian, Pakistani, Bangladeshi, other<br>Chinese/Chinese British<br>Black/Black British – Caribbean, African, other<br>Middle Eastern/Middle Eastern British – Arab, Turkish, other<br>Mixed race – White and Black/Black British<br>Mixed race – other<br>Other ethnic groups (please specify in the text box provided)<br>Prefer not to say                                                                                                                                                                                                                                                                                                                                                                                                                                                                  |
| What is your height in feet and inches, or centimetres?         | Text box provided for each                                                                                                                                                                                                                                                                                                                                                                                                                                                                                                                                                                                                                                                                                                                                                                                                                                            |
| What is your weight in pounds or kilograms?                     | Text box provided for each                                                                                                                                                                                                                                                                                                                                                                                                                                                                                                                                                                                                                                                                                                                                                                                                                                            |

|                                                                            |                                                                                                                                 |                                                                                                                                                                                                                                                                   |
|----------------------------------------------------------------------------|---------------------------------------------------------------------------------------------------------------------------------|-------------------------------------------------------------------------------------------------------------------------------------------------------------------------------------------------------------------------------------------------------------------|
| 1<br>2<br>3<br>4<br>5<br>6                                                 | Do you work in health or social care?                                                                                           | Yes (please provide your job title in the text box)<br>No                                                                                                                                                                                                         |
| 7<br>8<br>9                                                                | Does your job require you to be in direct contact with coronavirus (COVID-19) patients?                                         | Yes<br>No                                                                                                                                                                                                                                                         |
| 10<br>11                                                                   | Please provide the first half of your postcode (e.g. NG1)                                                                       | Textbox provided                                                                                                                                                                                                                                                  |
| 12                                                                         | Please provide your email address                                                                                               | Textbox provided                                                                                                                                                                                                                                                  |
| <b>Section B: awareness, attitudes and actions relating to COVID-19</b>    |                                                                                                                                 |                                                                                                                                                                                                                                                                   |
| 13<br>14<br>15<br>16<br>17                                                 | Have you had coronavirus?                                                                                                       | Yes – I have been diagnosed and am still ill<br>Yes – I have and I have recovered<br>Yes - I have been diagnosed, but had no symptoms<br>No                                                                                                                       |
| 18<br>19<br>20<br>21                                                       | Have you experienced coronavirus symptoms?                                                                                      | Yes - and I was diagnosed<br>Yes – but I have not been diagnosed<br>No<br>I don't know what the symptoms                                                                                                                                                          |
| 22<br>23<br>24<br>25<br>26<br>27<br>28<br>29<br>30<br>31<br>32<br>33<br>34 | Which of the below are symptoms of coronavirus?<br>(Select all that is relevant)                                                | Persistent cough<br>Feeling confused<br>Loss of appetite<br>Loss of smell<br>Loss of taste<br>Tightness in chest<br>Diarrhoea<br>Fatigue<br>Shortness of breath<br>Fever<br>Sore throat<br>None of the above                                                      |
| 35<br>36<br>37<br>38<br>39<br>40<br>41<br>42<br>43<br>44<br>45             | Have you taken any of the actions below in response to the coronavirus (COVID-19) outbreak? (select all that apply)             | Social distancing<br>Self-isolation<br>Worn protective apparel (e.g. gloves, mask etc.)<br>Used online shopping or food delivery service<br>Shielding due as my health status means I am defined as 'extremely vulnerable'<br>All of the above<br>Other (Textbox) |
| 46<br>47                                                                   | Do you believe you are at higher risk of severe illness from coronavirus (COVID-19)?                                            | Yes<br>No                                                                                                                                                                                                                                                         |
| 48<br>49<br>50                                                             | Why do you believe you are at a higher risk of severe illness from coronavirus (COVID-19)? (only for those who answered yes)    | Textbox                                                                                                                                                                                                                                                           |
| 51<br>52<br>53<br>54                                                       | Why do you believe you are not at a higher risk of severe illness from coronavirus (COVID-19)? (only for those who answered no) | Textbox                                                                                                                                                                                                                                                           |

|                                                                                              |                                                                                                                                                                                                                                                                                                                                                                                                                                                                                                                                                                              |                                                                                                                                                                                                                                                                                                                     |
|----------------------------------------------------------------------------------------------|------------------------------------------------------------------------------------------------------------------------------------------------------------------------------------------------------------------------------------------------------------------------------------------------------------------------------------------------------------------------------------------------------------------------------------------------------------------------------------------------------------------------------------------------------------------------------|---------------------------------------------------------------------------------------------------------------------------------------------------------------------------------------------------------------------------------------------------------------------------------------------------------------------|
| 1<br>2<br>3<br>4<br>5<br>6                                                                   | Describe how being identified as being at a higher risk of severe illness from coronavirus (COVID-19) by the UK Government, has made you feel?                                                                                                                                                                                                                                                                                                                                                                                                                               | Textbox                                                                                                                                                                                                                                                                                                             |
| 7<br>8<br>9<br>10<br>11<br>12<br>13<br>14<br>15<br>16<br>17<br>18<br>19                      | What sources have informed you that you are at a higher risk from coronavirus (COVID-19)? (select all that apply)                                                                                                                                                                                                                                                                                                                                                                                                                                                            | Traditional media (TV, Newspapers, Radio)<br>Social media (Twitter, Facebook, Instagram, Snapchat)<br>National or Local Government<br>Employer<br>Healthcare organisations<br>Community groups<br>Charity<br>Friends and Family<br>Schools and education centres<br>Other (please specify in the text box provided) |
| 20<br>21<br>22                                                                               | Do you feel like you have enough information specific to your higher risk of severe illness from coronavirus (COVID-19)?                                                                                                                                                                                                                                                                                                                                                                                                                                                     | Yes<br>No                                                                                                                                                                                                                                                                                                           |
| 23<br>24<br>25<br>26<br>27<br>28                                                             | Why do you believe you have received enough information specific to your higher risk of severe illness from coronavirus (COVID-19), and what more do you want to know? (only for those who answered yes)                                                                                                                                                                                                                                                                                                                                                                     | Textbox                                                                                                                                                                                                                                                                                                             |
| 29<br>30<br>31<br>32<br>33                                                                   | Why do you believe you have not received enough information specific to your higher risk of severe illness from coronavirus (COVID-19), and what else do you want to know? (only for those who answered no)                                                                                                                                                                                                                                                                                                                                                                  | Textbox                                                                                                                                                                                                                                                                                                             |
| 34<br>35<br>36                                                                               | Have you used other forms of information (i.e. nonprofessional/social media “experts”/other people/patients) since the COVID-19 outbreak?                                                                                                                                                                                                                                                                                                                                                                                                                                    | Yes<br>No                                                                                                                                                                                                                                                                                                           |
| 37<br>38<br>39                                                                               | Please specify what information you have used relating to your higher risk status since the coronavirus (COVID19) outbreak                                                                                                                                                                                                                                                                                                                                                                                                                                                   | Textbox                                                                                                                                                                                                                                                                                                             |
| 40<br>41<br>42<br>43<br>44<br>45<br>46<br>47<br>48<br>49<br>50<br>51<br>52<br>53<br>54<br>55 | How concerned are you about each of the statements below <ul style="list-style-type: none"> <li>• Becoming infected with coronavirus (COVID-19)</li> <li>• Severe illness and possibly death from coronavirus (COVID-19)</li> <li>• Spreading coronavirus (COVID-19) to others including family and friends</li> <li>• Access to healthcare support (e.g. advice, medication)</li> <li>• If you become infected, that you would receive appropriate care/support</li> <li>• That your higher risk of severe illness from coronavirus (COVID-19) means you may not</li> </ul> | Likert scale from 0 (Not concerned at all) to 10 (Very concerned)                                                                                                                                                                                                                                                   |

|                                                                                                                                                                   |                                                                                                                                                                                                                                                                                                                                                |
|-------------------------------------------------------------------------------------------------------------------------------------------------------------------|------------------------------------------------------------------------------------------------------------------------------------------------------------------------------------------------------------------------------------------------------------------------------------------------------------------------------------------------|
| receive healthcare support compared with people who do not have a higher risk status                                                                              |                                                                                                                                                                                                                                                                                                                                                |
| <b><i>Section C: impact of COVID-19 on management of health conditions and use of technology</i></b>                                                              |                                                                                                                                                                                                                                                                                                                                                |
| Has your management of your health condition changed compared to before the coronavirus (COVID-19) outbreak?                                                      | Yes<br>No<br>Not applicable (70 years or over or pregnant without a health condition)                                                                                                                                                                                                                                                          |
| How and why has it changed?                                                                                                                                       | Textbox                                                                                                                                                                                                                                                                                                                                        |
| How do you feel about changing your management of your health condition due to the coronavirus (COVID-19) outbreak?                                               | Textbox                                                                                                                                                                                                                                                                                                                                        |
| Has COVID-19 changed your regular healthcare support? (this could type or frequency of support e.g. appointments, service, medications, communication consultant) | Appointments (please specify in the text box)<br>Medication (please specify in the text box)<br>Elective surgery (please specify in the text box)<br>Communication platform (please specify in the text box)<br>Clinician caring for me (please specify in the text box)<br>Other (please specify in the text box)<br>There has been no change |
| Have you received care through any of the following platforms?                                                                                                    | Social media (please specify in the text box)<br>Mobile phone app (please specify in the text box)<br>Email<br>Telephone Virtual consultation e.g. Zoom, Microsoft Teams (please specify in the text box)<br>Other (please specify in the text box)<br>No platforms have been used<br>I am still receiving face to face care                   |
| How satisfied are you with using the platforms that you are receiving care through?                                                                               | Extremely dissatisfied<br>Somewhat dissatisfied<br>Neither satisfied nor dissatisfied<br>Somewhat satisfied<br>Extremely satisfied                                                                                                                                                                                                             |
| How satisfied are you with using the information/resources provided through the platforms that you are receiving care through?                                    | Extremely dissatisfied<br>Somewhat dissatisfied<br>Neither satisfied nor dissatisfied<br>Somewhat satisfied<br>Extremely satisfied                                                                                                                                                                                                             |
| Would you welcome the continued use of these platforms in the future, after the coronavirus (COVID-19) outbreak?                                                  | Yes<br>No, but would welcome other platforms (please specify in the text box)<br>No<br>Not sure, I need more time to use them                                                                                                                                                                                                                  |

|                                                                                                                                                                                                                                                                                                                                                                                                                                                                                                                                                                                                                                                                                                                                                                                                                                                                                                                                                          |                                                                                     |
|----------------------------------------------------------------------------------------------------------------------------------------------------------------------------------------------------------------------------------------------------------------------------------------------------------------------------------------------------------------------------------------------------------------------------------------------------------------------------------------------------------------------------------------------------------------------------------------------------------------------------------------------------------------------------------------------------------------------------------------------------------------------------------------------------------------------------------------------------------------------------------------------------------------------------------------------------------|-------------------------------------------------------------------------------------|
| <p>You indicated that you have more than one of the high risk indicator for severe illness from coronavirus (COVID19). Please describe how this makes you feel, and why?</p>                                                                                                                                                                                                                                                                                                                                                                                                                                                                                                                                                                                                                                                                                                                                                                             | Textbox                                                                             |
| <b>Section D: Mental Health and Wellbeing</b>                                                                                                                                                                                                                                                                                                                                                                                                                                                                                                                                                                                                                                                                                                                                                                                                                                                                                                            |                                                                                     |
| <p>Since the coronavirus (COVID-19) outbreak, my mental health is</p>                                                                                                                                                                                                                                                                                                                                                                                                                                                                                                                                                                                                                                                                                                                                                                                                                                                                                    | <p>Yes<br/>No</p>                                                                   |
| <p>Warwick-Edinburgh Mental Well-being Scale (WEMWBS)<br/>During the past two weeks...</p> <ul style="list-style-type: none"> <li>• I've been feeling optimistic about the future</li> <li>• I've been feeling useful</li> <li>• I've been feeling relaxed</li> <li>• I've been feeling interested in other people</li> <li>• I've had energy to spare</li> <li>• I've been dealing with problems well</li> <li>• I've been thinking clearly</li> <li>• I've been feeling good about myself</li> <li>• I've been feeling close to other people</li> <li>• I've been feeling confident</li> <li>• I've been able to make up my own mind about things</li> <li>• I've been feeling loved</li> <li>• I've been interested in new things</li> <li>• I've been feeling cheerful</li> </ul>                                                                                                                                                                    | <p>Not at all<br/>Rarely<br/>Some of the time<br/>Often<br/>All of the time</p>     |
| <p>Patient Health Questionnaire (PHQ-9)<br/>Over the last two weeks, how often have you been bothered by any of the following problems</p> <ul style="list-style-type: none"> <li>• Little interest or pleasure in doing things?</li> <li>• Feeling down, depressed, or hopeless?</li> <li>• Trouble falling or staying asleep, or sleeping too much?</li> <li>• Feeling tired or having little energy?</li> <li>• Poor appetite or overeating?</li> <li>• Feeling bad about yourself - or that you are a failure or have let yourself or your family down?</li> <li>• Trouble concentrating on things, such as reading the newspaper or watching television?</li> <li>• Moving or speaking so slowly that other people could have noticed? Or the opposite - being so fidgety or restless that you have been moving around a lot more than usual?</li> <li>• Thoughts that you would be better off dead, or of hurting yourself in some way?</li> </ul> | <p>Not at all<br/>Several days<br/>More than half the days<br/>Nearly every day</p> |
| <b>Section D: lifestyle related behaviours</b>                                                                                                                                                                                                                                                                                                                                                                                                                                                                                                                                                                                                                                                                                                                                                                                                                                                                                                           |                                                                                     |

|                                                    |                                                                                                     |                                                                                                                                                                                                         |
|----------------------------------------------------|-----------------------------------------------------------------------------------------------------|---------------------------------------------------------------------------------------------------------------------------------------------------------------------------------------------------------|
| 1<br>2<br>3<br>4<br>5<br>6<br>7                    | Has your shopping changed since the coronavirus (COVID-19) outbreak?                                | A great deal<br>A lot<br>A moderate amount<br>A little<br>Not at all                                                                                                                                    |
| 8<br>9                                             | Describe how your shopping has changed since the coronavirus (COVID-19) outbreak                    | Textbox                                                                                                                                                                                                 |
| 10<br>11<br>12<br>13<br>14<br>15                   | Has your diet changed since the coronavirus (COVID19) outbreak?                                     | A great deal<br>A lot<br>A moderate amount<br>A little<br>Not at all                                                                                                                                    |
| 16<br>17                                           | Describe how your diet has changed since the coronavirus (COVID-19) outbreak                        | Textbox                                                                                                                                                                                                 |
| 18<br>19<br>20<br>21<br>22<br>23<br>24             | Has your alcohol consumption changed since the coronavirus outbreak?                                | I have consumed much less alcohol than usual<br>I have consumed less alcohol than usual<br>It hasn't changed<br>I have consumed more alcohol than usual<br>I have consumed much more alcohol than usual |
| 25<br>26<br>27                                     | Why has your alcohol consumption changed since the coronavirus (COVID-19) outbreak?                 | Textbox                                                                                                                                                                                                 |
| 28<br>29<br>30<br>31<br>32                         | Has the amount of physical activity you usually engage in changed since the coronavirus outbreak?   | I am much less active<br>I am less active<br>It hasn't changed<br>I am more active<br>I am much more active                                                                                             |
| 33<br>34                                           | Has the type of physical activity you usually engage in changed since the coronavirus outbreak?     | Yes<br>No                                                                                                                                                                                               |
| 35<br>36<br>37                                     | Describe how and why your physical activity has changed since the coronavirus outbreak              | Textbox                                                                                                                                                                                                 |
| 38<br>39<br>40<br>41<br>42                         | Has the amount or quality of your sleep changed since the coronavirus outbreak?                     | A great deal<br>A lot<br>A moderate amount<br>A little<br>Not at all                                                                                                                                    |
| 43<br>44                                           | Describe how and why the amount or quality of your sleep has changed since the coronavirus outbreak | Textbox                                                                                                                                                                                                 |
| 45<br>46                                           | Do you smoke tobacco?                                                                               | Yes<br>No                                                                                                                                                                                               |
| 47<br>48<br>49<br>50<br>51                         | Has the amount of tobacco you smoke changed compared to before the coronavirus (COVID-19) outbreak? | Much more<br>Somewhat more<br>About the same<br>Somewhat less<br>Much less                                                                                                                              |
| 52<br>53<br>54<br>55<br>56<br>57<br>58<br>59<br>60 | Do you use e-cigarettes?                                                                            | Yes<br>No                                                                                                                                                                                               |

|                                  |                                                                                                                                                                                                                        |                                                                            |
|----------------------------------|------------------------------------------------------------------------------------------------------------------------------------------------------------------------------------------------------------------------|----------------------------------------------------------------------------|
| 1<br>2<br>3<br>4<br>5<br>6<br>7  | Has the amount of e-cigarettes you use changed compared to before the coronavirus (COVID19) outbreak?                                                                                                                  | Much more<br>Somewhat more<br>About the same<br>Somewhat less<br>Much less |
| 8<br>9                           | Other than alcohol or tobacco, do you use any recreational drugs?                                                                                                                                                      | Yes<br>No                                                                  |
| 10<br>11<br>12<br>13<br>14<br>15 | Has the amount of recreational drugs you use changed compared to before the coronavirus (COVID19) outbreak?                                                                                                            | Much more<br>Somewhat more<br>About the same<br>Somewhat less<br>Much less |
| 16                               | <b><i>Section E: Interaction with others</i></b>                                                                                                                                                                       |                                                                            |
| 17<br>18<br>19                   | For the following questions, please respond with your health condition or higher risk status (70 years old or over or pregnant regardless of medical conditions) in mind. Since the coronavirus (COVID-19) outbreak... |                                                                            |
| 20<br>21                         | Other people have behaved differently towards you?                                                                                                                                                                     | Yes<br>No                                                                  |
| 22<br>23<br>24<br>25             | Describe how and why people have behaved differently towards you since the COVID-19 outbreak?                                                                                                                          | Textbox                                                                    |
| 26<br>27                         | You felt stigmatised or discriminated against?                                                                                                                                                                         | Yes<br>No                                                                  |
| 28<br>29<br>30                   | Describe the stigmatising and/or discriminatory experience(s) you have had since the COVID-19 outbreak, and how this has made you feel?                                                                                | Textbox                                                                    |
| 31                               | <b><i>Final section</i></b>                                                                                                                                                                                            |                                                                            |
| 32<br>33<br>34<br>35             | Is there anything that you haven't had chance to say about the coronavirus outbreak that you would like to share?                                                                                                      | Textbox                                                                    |

## Supplementary Data analysis

### *Statistical analysis*

We fit generalised linear models to the data. Participant responses were used to calculate the WEMWBS and PHQ-9 scores for well-being and depression, respectively. We imputed missing values for participants who did not respond to all items needed to calculate WEMWBS and PHQ-9 scores. If a participant responded to at least 11 of the 14 WEMWBS items or at least 7 of the 9 PHQ-9 items, we used the mean value of the participant's responses in place of missing values. WEMWBS, PHQ-9, and concerns regarding COVID-19 were treated as continuous outcomes. Logistic regression models were used to model 1) actions taken to mitigate the risk of contracting COVID-19, 2) the impact of COVID-19 on the management of health conditions, and 3) the technology platforms used to receive health care. Responses regarding the impact of COVID-19 on lifestyle related behaviours were modelled using multinomial and Adjacent Category Logit models assuming proportional odds. Odds ratios and p-values were reported for logistic, multinomial, and Adjacent Category Logit models.

Each response was modelled as a function of the indicators for high risk of severe illness from COVID-19 (12 separate binary variables) which included: diabetes; Body Mass Index (BMI)  $\geq 40\text{kg/m}^2$ ; chronic respiratory disease; chronic heart disease; chronic kidney disease (CKD); chronic liver disease; chronic neurological conditions; spleen problems; weakened immune system; aged over 70 years; pregnant; and other, which included short or long-term health conditions. Other covariates in the models were the participant's gender (male or female), age (in years), BMI (numeric), Index of Multiple Deprivation (IMD; numeric: 1-10 as identified using the English Indices of Deprivation 2019), and whether the participant had multiple indicators for high risk (categorical: one, two, three or more conditions). Descriptive data were summarised with mean (standard deviations [SD]) or median (interquartile range [IQR]) for continuous data depending on data distribution, with categorical data summarised as counts (percentage, %). All statistical analyses were performed using the tidyverse (version 1.3.0; Wickham et al., 2019) and VGAM (version 1.1-2; Yee, 2020) packages in R (version 3.6.2.; R Core Team, 2019). Statistical significance defined was a p-value  $<0.05$ .

### References

1. UK Government. (2019). English Indices of Deprivation. 2019. <http://imd-by-postcode.opendatacommunities.org/imd/2019> [Last accessed August 26 2020].
2. Wickham H, Averick M, Bryan J, Chang W, McGowan LD, François R, Grolemund G, Hayes A, Henry L, Hester J, Kuhn M. Welcome to the Tidyverse. *Journal of Open Source Software*. 2019 Nov 21;4(43):1686.
3. Yee TW. Complements to Vector Generalized Linear and Additive Models. R package version 1.1-3.
4. R: A language and environment for statistical computing. R Foundation for Statistical Computing, Vienna, Austria. 2019. URL <https://www.R-project.org/>
5. Gilbert CH, Hutto E. Vader: A parsimonious rule-based model for sentiment analysis of social media text. In Eighth International Conference on Weblogs and Social Media (ICWSM-14). Available at (20/04/16) <http://comp.social.gatech.edu/papers/icwsm14.vader.hutto.pdf> 2014 Jun (Vol. 81, p. 82).



### *Text Data*

Text data was collected across 17 open-ended questions which were distributed throughout the survey sections. All responses to open-ended questions were concatenated, yielding a language sample for each survey participant, which was then tokenised using spaCy's large English web model<sup>1</sup>. The length of the concatenated responses (i.e. the number of tokens, including words, digits, and punctuation) varied from 1 to 2125 tokens (mean=184, median=135). The language sample for each participant was further processed to derive sentiment scores and personality scores. VADER Sentiment Analysis tool (Hutto & Gilbert, 2014) was used to obtain sentiment scores (positive, neutral, negative, and compound sentiment). Personality scores were obtained using proprietary software by Scaled Insights. The software takes as input a language sample and produces 114 personality features. Following this, the 118 features (114 personality, 4 sentiment) were used as input into the multiple machine learning models described below. As the reliability of the personality modelling software depends on the number of words provided in the language sample, the following analysis was restricted to participants (N=636) whose combined text response consisted of at least 100 tokens. The machine learning was used in two settings: unsupervised (clustering) and supervised (classification or regression).

In addition to the clustering, we investigated to what extent features obtained from a language sample could be used for predicting concerns, mitigating actions, impact on lifestyle behaviours, and wellbeing and depression scores in the context of COVID-19. A model which predicts these attitudes and behaviours and requires only a language sample could potentially be used within a digital environment to better identify people who might be more likely to be negatively impacted and offer them preventative support.

For each attitude or behaviour we trained a separate binary or multi-class classifier. We first explored a range of different classifiers (logistic regression, support vector machine, stochastic gradient descent classifier, and Random Forest). Across all classifiers we found that Random Forest achieved the best results, and we tuned the parameters for each classifier separately. The tuned parameters were then used to train the final classifiers using 10-fold cross-validation. As there were only sufficient language samples for 636 participants, we also trained classifiers using GloVe word vectors obtained from the same language model as the tokens. By using word vectors, we were able to train prediction models using all participants' data.

All classification problems were evaluated using the Area Under the Receiver Operating Characteristics (AUROC) metric, while regression problems were evaluated using Mean Absolute Error (MAE) and explained variance.

### *Concerns about COVID-19*

A large proportion of participants in each high-risk group reported that they were 'very concerned' to statements about infection, spread and potential impact of COVID-19; see Supplementary Figure 1-6.

Participants with either chronic respiratory disease, chronic heart disease, CKD, other acute/chronic diseases, diabetes, or weakened immune systems were more concerned about becoming infected compared to those who did not belong to any of these high-risk groups ( $p < 0.05$ ). The coefficients for these covariates suggest that participants in either of these high-risk groups selected the next highest response compared to individuals who believed they were not at high risk. Additionally, concerns about being infected were significantly higher for women than in men (difference 0.59;  $p = 0.003$ ), and for older participants (difference 0.02;  $p=0.032$ ), although the differences were relatively small. Participants with either chronic

---

<sup>1</sup> [https://spacy.io/models/en#en\\_core\\_web\\_lg](https://spacy.io/models/en#en_core_web_lg)

1  
2  
3 respiratory disease, chronic heart disease, CKD, BMI  $\geq$  40, or weakened immune systems were more  
4 concerned about experiencing severe illness or death (next highest response) compared to those who did  
5 not belong to these high-risk groups ( $p < 0.05$ ); whereas pregnant women were less concerned (2.10 points  
6 lower) than women who were not pregnant ( $p = 0.012$ ).  
7

8 Participants with chronic respiratory disease were significantly more concerned (next highest response)  
9 about access to healthcare support ( $p = 0.020$ ).

10 There were no statistically significant factors for the models with the following concerns: spreading  
11 COVID-19 to others; receiving appropriate care/support; and potentially receiving disparate healthcare  
12 support due to higher risk status. This suggests that high concern was similar across all high-risk groups.  
13  
14

### 15 16 *Mitigating COVID-19*

17 More than 50% of participants in each high-risk group practiced social distancing with the exception of  
18 those with weakened immune systems ( $n=71$ ; 44.7%); see Supplementary Table 1. Twenty-one (60%)  
19 participants with chronic neurological diseases and 102 (57.3%) aged 70 years or older self-isolated.  
20 Twenty-eight (57.1%) participants with chronic liver disease, 18 with chronic neurological disease, and 96  
21 (53.9%) aged 70 years or older used online shopping or food delivery. Eighty-five (53.5%) participants  
22 with weakened immune systems and 11 (68.8%) with spleen problems used shielding. Less than 50% of  
23 participants in each high-risk group wore protective apparel or took all of the actions specified in the survey.  
24

25 Participants living with diabetes were more likely to practice social distancing (odds ratio (OR) 2.44;  $p =$   
26 0.010), whereas participants with weakened immune systems were less likely to practice social distancing  
27 (OR 0.34;  $p = 0.005$ ). Participants living with diabetes were also more likely to wear protective apparel  
28 (OR 2.17;  $p = 0.019$ ); while participants with people  $> 70$  years and chronic liver disease were more likely  
29 to shop online (OR 2.66 and 3.34;  $p = 0.013$  and 0.007, respectively). Participants with either CKD,  
30 weakened immune systems or spleen problems were more likely to practice shielding (OR 2.76, 3.33, and  
31 5.33;  $p = 0.016$ , 0.002, and 0.035, respectively). Finally, participants with weakened immune systems were  
32 more likely to take all mitigating risk actions identified compared with the other at-risk groups (OR 2.61;  
33  $p = 0.039$ ). There were no statistically significant differences between high risk groups with regards to self-  
34 isolation.  
35  
36

### 37 38 *Interactions with Others and Stigma*

39 Three hundred and seventy-seven (41.0%) participants indicated that people behaved differently toward  
40 them compared to prior to COVID-19 lockdown. When asked if during the COVID-19 lockdown they felt  
41 more stigmatised or discriminated against 119 (13.0%) reported they had compared to prior to COVID-19  
42 lockdown. Of these participants, 65 (54.6%) were living with diabetes, 25 (21.0%) had a BMI of  $\geq 40$   
43 kg/m<sup>2</sup>, 21 (17.6%) had chronic respiratory disease, 24 (20.2%) had a weakened immune system, and 44  
44 (37%) had other chronic short- or long-term risk factors. In all other high-risk groups fewer than 20  
45 participants said that they felt stigmatised or discriminated against.  
46

47 Participants with two high risk indicators and participants with three or more high risk indicators were more  
48 likely to report that people behaved differently towards them (OR 2.38 and 6.17;  $p = 0.015$  and 0.013,  
49 respectively). There were no discernible differences between the high-risk groups with regards to feelings  
50 of stigma and discrimination compared to prior to COVID-19 lockdown.  
51  
52  
53  
54  
55  
56  
57  
58  
59  
60

## Prediction models

### *Concerns about COVID-19*

The responses relating to concerns were all expressed on a [1,10] scale. To form classes, the values were split into 'slight' (1-3), 'some' (4-7) and 'great' (8-10). Word vectors achieved the best performance with AUROC ranging from 0.71 to 0.78; see Supplementary Table 3.

### *Mitigating COVID-19*

The mitigating actions each formed a binary class (i.e. someone either used particular mitigation action or not). Best performance was achieved by word vectors with AUROC ranging between 0.67 and 0.82. In the case of a more unbalanced class (predicting someone taking all possible mitigating actions), the best AUROC score (0.68) was achieved by personality and sentiment features; see Supplementary Table 2.

### *Impact of COVID-19 on Health and Lifestyle Related Behaviours*

The responses on the impact of COVID-19 on lifestyle behaviours, used scales which were converted to classes as follows. Scale [-2,2] (used for alcohol consumption, physical activity, smoking, e-cigarettes, and recreational drug use) was converted to 'Decrease' [-2,-1], 'No Change' [0], 'Increase' [1,2]. Scale [0,4] (used for shopping, diet and sleep) was converted to 'No or little impact' [0,1], 'Some impact' [2], 'Great impact' [3,4]. For the lifestyle behaviours which were not well represented in the survey cohort (smoking, e-cigarettes, and recreational drug use) the results are very low (AUROC slightly better than random at 0.53 for recreational drug use). The best classifiers for other lifestyle behaviours had AUROC scores between 0.72 and 0.81; see Supplementary Table 4.

### *Impact of COVID-19 on Wellbeing*

The scores for WEMWBS and PHQ-9 for both measures were used directly as target variables in the regression models. Unlike the prediction models reported previously, for both wellbeing and depression scores the best performing models used personality and sentiment scores. The model for depression achieved MAE = 4.25 and explained variance of 0.15, while the wellbeing model achieved MAE=7.97 and explained variance of 0.17; see Supplementary Table 5.

**Supplementary Table 1.** Mitigating actions taken in response to the coronavirus outbreak.

|                                                    | <b>Diabetes</b><br>(N=538) | <b>BMI</b><br><b>≥ 40 kg/m<sup>2</sup></b><br>(N=142) | <b>Chronic</b><br><b>Respiratory</b><br><b>Disease</b><br>(N=179) | <b>Chronic</b><br><b>Heart</b><br><b>Disease</b><br>(N=132) | <b>Chronic</b><br><b>Kidney</b><br><b>Disease</b><br>(N=147) | <b>Chronic</b><br><b>Liver</b><br><b>Disease</b><br>(N=49) | <b>Chronic</b><br><b>Neurological</b><br><b>Disease</b><br>(N=35) | <b>Spleen</b><br><b>Problems</b><br>(N=16) | <b>Weakened</b><br><b>Immune</b><br><b>System</b><br>(N=159) | <b>Aged</b><br><b>&gt; 70 years</b><br>(N=178) | <b>Pregnant</b><br>(N=21) | <b>Other</b><br><b>Risk</b><br><b>Factors</b><br>(N=303) |
|----------------------------------------------------|----------------------------|-------------------------------------------------------|-------------------------------------------------------------------|-------------------------------------------------------------|--------------------------------------------------------------|------------------------------------------------------------|-------------------------------------------------------------------|--------------------------------------------|--------------------------------------------------------------|------------------------------------------------|---------------------------|----------------------------------------------------------|
| <b>Social distancing n (%)</b>                     |                            |                                                       |                                                                   |                                                             |                                                              |                                                            |                                                                   |                                            |                                                              |                                                |                           |                                                          |
| Yes                                                | 446 (82.9%)                | 105 (73.9%)                                           | 125 (69.8%)                                                       | 90 (68.2%)                                                  | 82 (55.8%)                                                   | 32 (65.3%)                                                 | 26 (74.3%)                                                        | 9 (56.2%)                                  | 71 (44.7%)                                                   | 135 (75.8%)                                    | 18 (85.7%)                | 212 (70.0%)                                              |
| No                                                 | 92 (17.1%)                 | 37 (26.1%)                                            | 54 (30.2%)                                                        | 42 (31.8%)                                                  | 65 (44.2%)                                                   | 17 (34.7%)                                                 | 9 (25.7%)                                                         | 7 (43.8%)                                  | 88 (55.3%)                                                   | 43 (24.2%)                                     | 3 (14.3%)                 | 91 (30.0%)                                               |
| <b>Self-isolation n (%)</b>                        |                            |                                                       |                                                                   |                                                             |                                                              |                                                            |                                                                   |                                            |                                                              |                                                |                           |                                                          |
| Yes                                                | 263 (48.9%)                | 68 (47.9%)                                            | 83 (46.4%)                                                        | 58 (43.9%)                                                  | 66 (44.9%)                                                   | 19 (38.8%)                                                 | 21 (60.0%)                                                        | 7 (43.8%)                                  | 61 (38.4%)                                                   | 102 (57.3%)                                    | 10 (47.6%)                | 148 (48.8%)                                              |
| No                                                 | 275 (51.1%)                | 74 (52.1%)                                            | 96 (53.6%)                                                        | 74 (56.1%)                                                  | 81 (55.1%)                                                   | 30 (61.2%)                                                 | 14 (40.0%)                                                        | 9 (56.2%)                                  | 98 (61.6%)                                                   | 76 (42.7%)                                     | 11 (52.4%)                | 155 (51.2%)                                              |
| <b>Worn protective apparel n (%)</b>               |                            |                                                       |                                                                   |                                                             |                                                              |                                                            |                                                                   |                                            |                                                              |                                                |                           |                                                          |
| Yes                                                | 201 (37.4%)                | 47 (33.1%)                                            | 59 (33.0%)                                                        | 44 (33.3%)                                                  | 30 (20.4%)                                                   | 17 (34.7%)                                                 | 13 (37.1%)                                                        | 1 (6.2%)                                   | 22 (13.8%)                                                   | 57 (32.0%)                                     | 6 (28.6%)                 | 106 (35.0%)                                              |
| No                                                 | 337 (62.6%)                | 95 (66.9%)                                            | 120 (67.0%)                                                       | 88 (66.7%)                                                  | 117 (79.6%)                                                  | 32 (65.3%)                                                 | 22 (62.9%)                                                        | 15 (93.8%)                                 | 137 (86.2%)                                                  | 121 (68.0%)                                    | 15 (71.4%)                | 197 (65.0%)                                              |
| <b>Used online shopping or food delivery n (%)</b> |                            |                                                       |                                                                   |                                                             |                                                              |                                                            |                                                                   |                                            |                                                              |                                                |                           |                                                          |
| Yes                                                | 258 (48.0%)                | 67 (47.2%)                                            | 77 (43.0%)                                                        | 66 (50.0%)                                                  | 60 (40.8%)                                                   | 28 (57.1%)                                                 | 18 (51.4%)                                                        | 7 (43.8%)                                  | 55 (34.6%)                                                   | 96 (53.9%)                                     | 10 (47.6%)                | 125 (41.3%)                                              |
| No                                                 | 280 (52.0%)                | 75 (52.8%)                                            | 102 (57.0%)                                                       | 66 (50.0%)                                                  | 87 (59.2%)                                                   | 21 (42.9%)                                                 | 17 (48.6%)                                                        | 9 (56.2%)                                  | 104 (65.4%)                                                  | 82 (46.1%)                                     | 11 (52.4%)                | 178 (58.7%)                                              |
| <b>Shielding n (%)</b>                             |                            |                                                       |                                                                   |                                                             |                                                              |                                                            |                                                                   |                                            |                                                              |                                                |                           |                                                          |
| Yes                                                | 100 (18.6%)                | 33 (23.2%)                                            | 65 (36.3%)                                                        | 38 (28.8%)                                                  | 68 (46.3%)                                                   | 22 (44.9%)                                                 | 6 (17.1%)                                                         | 11 (68.8%)                                 | 85 (53.5%)                                                   | 38 (21.3%)                                     | 2 (9.5%)                  | 80 (26.4%)                                               |
| No                                                 | 438 (81.4%)                | 109 (76.8%)                                           | 114 (63.7%)                                                       | 94 (71.2%)                                                  | 79 (53.7%)                                                   | 27 (55.1%)                                                 | 29 (82.9%)                                                        | 5 (31.2%)                                  | 74 (46.5%)                                                   | 140 (78.7%)                                    | 19 (90.5%)                | 223 (73.6%)                                              |
| <b>All of the above n (%)</b>                      |                            |                                                       |                                                                   |                                                             |                                                              |                                                            |                                                                   |                                            |                                                              |                                                |                           |                                                          |
| Yes                                                | 55 (10.2%)                 | 19 (13.4%)                                            | 22 (12.3%)                                                        | 23 (17.4%)                                                  | 31 (21.1%)                                                   | 7 (14.3%)                                                  | 4 (11.4%)                                                         | 2 (12.5%)                                  | 40 (25.2%)                                                   | 29 (16.3%)                                     | 2 (9.5%)                  | 46 (15.2%)                                               |
| No                                                 | 483 (89.8%)                | 123 (86.6%)                                           | 157 (87.7%)                                                       | 109 (82.6%)                                                 | 116 (78.9%)                                                  | 42 (85.7%)                                                 | 31 (88.6%)                                                        | 14 (87.5%)                                 | 119 (74.8%)                                                  | 149 (83.7%)                                    | 19 (90.5%)                | 257 (84.8%)                                              |

**Supplementary Table 2.** Prediction results for mitigating actions using three feature groups and evaluated using AUROC. The best performing feature group is in bold.

|                                    | Social distancing | Self-isolation | PPE         | Online shopping | Shielding   | All above   |
|------------------------------------|-------------------|----------------|-------------|-----------------|-------------|-------------|
| # positive class                   | 491               | 306            | 208         | 304             | 173         | 77          |
| # negative class                   | 145               | 330            | 428         | 332             | 463         | 559         |
| Personality and sentiment features | 0.66              | 0.55           | 0.51        | 0.49            | 0.62        | <b>0.68</b> |
| Word vectors                       | <b>0.82</b>       | <b>0.7</b>     | <b>0.67</b> | <b>0.68</b>     | <b>0.73</b> | 0.54        |
| All features                       | 0.71              | 0.58           | 0.51        | 0.52            | 0.69        | 0.67        |

**Supplementary Table 3.** Prediction results for concerns using three feature groups and evaluated using AUROC. The best performing feature group is in bold.

|                                    | Becoming infected | Severe illness or death | Spreading to others | Access to healthcare | Enough support | Less care compared to low risk |
|------------------------------------|-------------------|-------------------------|---------------------|----------------------|----------------|--------------------------------|
| # Slight concern                   | 60                | 71                      | 114                 | 197                  | 156            | 236                            |
| # Some concern                     | 214               | 164                     | 190                 | 229                  | 185            | 160                            |
| # Great concern                    | 362               | 401                     | 332                 | 210                  | 295            | 240                            |
| Personality and sentiment features | 0.63              | 0.6                     | 0.54                | 0.58                 | 0.58           | 0.58                           |
| Word vectors                       | <b>0.78</b>       | <b>0.78</b>             | <b>0.73</b>         | <b>0.71</b>          | <b>0.71</b>    | <b>0.71</b>                    |
| All features                       | 0.64              | 0.62                    | 0.52                | 0.58                 | 0.58           | 0.58                           |

**Supplementary Table 4.** Prediction results for lifestyle behaviours using three feature groups and evaluated using AUROC. The best performing feature group is in bold.

|                                          | Shoppin<br>g | Diet        | Alcohol     | Amount<br>of<br>physical<br>activity | Sleep       | Smoking    | E-<br>cigarette<br>s | Recreati<br>onal<br>drugs |
|------------------------------------------|--------------|-------------|-------------|--------------------------------------|-------------|------------|----------------------|---------------------------|
| # Decrease /<br>Little impact            | 47           | 302         | 96          | 385                                  | 293         | 5          | 2                    | 3                         |
| # No change /<br>Some impact             | 90           | 205         | 372         | 99                                   | 157         | 623        | 624                  | 628                       |
| # Increase /<br>Great impact             | 499          | 129         | 168         | 152                                  | 186         | 8          | 10                   | 5                         |
| Personality<br>and sentiment<br>features | 0.56         | 0.62        | 0.61        | 0.65                                 | 0.65        | 0.44       | 0.55                 | 0.36                      |
| Word vectors                             | <b>0.81</b>  | <b>0.74</b> | <b>0.72</b> | <b>0.8</b>                           | <b>0.75</b> | <b>0.6</b> | <b>0.67</b>          | 0.45                      |
| All features                             | 0.55         | 0.6         | 0.56        | 0.61                                 | 0.65        | 0.58       | 0.58                 | <b>0.53</b>               |

**Supplementary Table 5.** Prediction results for depression (Patient Health Questionnaire, PHQ-9) and wellbeing score (Warwick-Edinburgh Mental Well-being Scale, WEMWBS) using three feature groups and evaluated using mean absolute error and explained variance. The best performing feature group is in bold.

|                                               | Depression score (PHQ-<br>9) | Wellbeing score<br>(WEMWBS) |
|-----------------------------------------------|------------------------------|-----------------------------|
| # participants                                | 584                          | 636                         |
| Personality and sentiment features, MAE       | <b>4.25</b>                  | <b>7.97</b>                 |
| Personality and sentiment features, Exp. Var. | <b>0.15</b>                  | <b>0.17</b>                 |
| Word vectors, MAE                             | 4.52                         | 8.6                         |
| Word vectors, Exp. Var.                       | 0.07                         | 0.1                         |
| All features, MAE                             | 4.33                         | 8.15                        |
| All features, Exp. Var.                       | 0.12                         | 0.13                        |

**Supplementary Table 6** Median wellbeing (Warwick-Edinburgh Mental Well-being Scale, WEMWBS) and depression (Patient Health Questionnaire, PHQ-9) scores based on high risk group.

|                                                  | <b>Wellbeing</b>         | <b>Depression</b>        |
|--------------------------------------------------|--------------------------|--------------------------|
|                                                  | <b>Median [Min, Max]</b> | <b>Median [Min, Max]</b> |
| <b>Diabetes</b>                                  |                          |                          |
| Yes                                              | 45.0 [14.0, 70.0]        | 6.00 [0, 26.0]           |
| No                                               | 46.0 [14.0, 70.0]        | 7.00 [0, 26.0]           |
| <b>BMI <math>\geq</math> 40 kg/m<sup>2</sup></b> |                          |                          |
| Yes                                              | 40.6 [15.0, 70.0]        | 10.00 [0, 26.0]          |
| No                                               | 46.0 [14.0, 70.0]        | 6.00 [0, 26.0]           |
| <b>Chronic Respiratory Disease</b>               |                          |                          |
| Yes                                              | 43.5 [14.0, 70.0]        | 9.00 [0, 26.0]           |
| No                                               | 46.0 [14.0, 70.0]        | 6.00 [0, 26.0]           |
| <b>Chronic Heart Disease</b>                     |                          |                          |
| Yes                                              | 47.4 [14.0, 70.0]        | 7.00 [0, 26.0]           |
| No                                               | 45.0 [14.0, 70.0]        | 6.00 [0, 26.0]           |
| <b>Chronic Kidney Disease</b>                    |                          |                          |
| Yes                                              | 47.0 [14.0, 70.0]        | 6.00 [0, 26.0]           |
| No                                               | 45.0 [14.0, 70.0]        | 6.00 [0, 26.0]           |
| <b>Chronic Liver Disease</b>                     |                          |                          |
| Yes                                              | 43.0 [15.0, 62.0]        | 7.00 [0, 22.0]           |
| No                                               | 46.0 [14.0, 70.0]        | 6.00 [0, 26.0]           |
| <b>Chronic Neurological Conditions</b>           |                          |                          |
| Yes                                              | 46.2 [19.0, 66.0]        | 8.00 [0, 22.0]           |
| No                                               | 45.0 [14.0, 70.0]        | 6.00 [0, 26.0]           |
| <b>Spleen problems</b>                           |                          |                          |
| Yes                                              | 46.0 [26.0, 66.0]        | 5.00 [2.0, 13.0]         |
| No                                               | 45.0 [14.0, 70.0]        | 6.00 [0, 26.0]           |
| <b>Weakened immune system</b>                    |                          |                          |
| Yes                                              | 46.0 [14.0, 68.0]        | 6.00 [0, 26.0]           |
| No                                               | 45.0 [14.0, 70.0]        | 6.00 [0, 26.0]           |

**Aged > 70 years**

|     |                   |                |
|-----|-------------------|----------------|
| Yes | 51.0 [14.0, 70.0] | 3.00 [0, 26.0] |
|-----|-------------------|----------------|

|    |                   |                |
|----|-------------------|----------------|
| No | 44.0 [14.0, 70.0] | 7.00 [0, 26.0] |
|----|-------------------|----------------|

**Pregnant**

|     |                   |                |
|-----|-------------------|----------------|
| Yes | 42.0 [29.0, 61.0] | 6.00 [0, 17.0] |
|-----|-------------------|----------------|

|    |                   |                |
|----|-------------------|----------------|
| No | 46.0 [14.0, 70.0] | 6.00 [0, 26.0] |
|----|-------------------|----------------|

**Other risk factors \***

|     |                   |                |
|-----|-------------------|----------------|
| Yes | 44.0 [14.0, 70.0] | 8.00 [0, 26.0] |
|-----|-------------------|----------------|

|    |                   |                |
|----|-------------------|----------------|
| No | 46.0 [14.0, 70.0] | 6.00 [0, 26.0] |
|----|-------------------|----------------|

---

\* *Changed type or frequency of support*



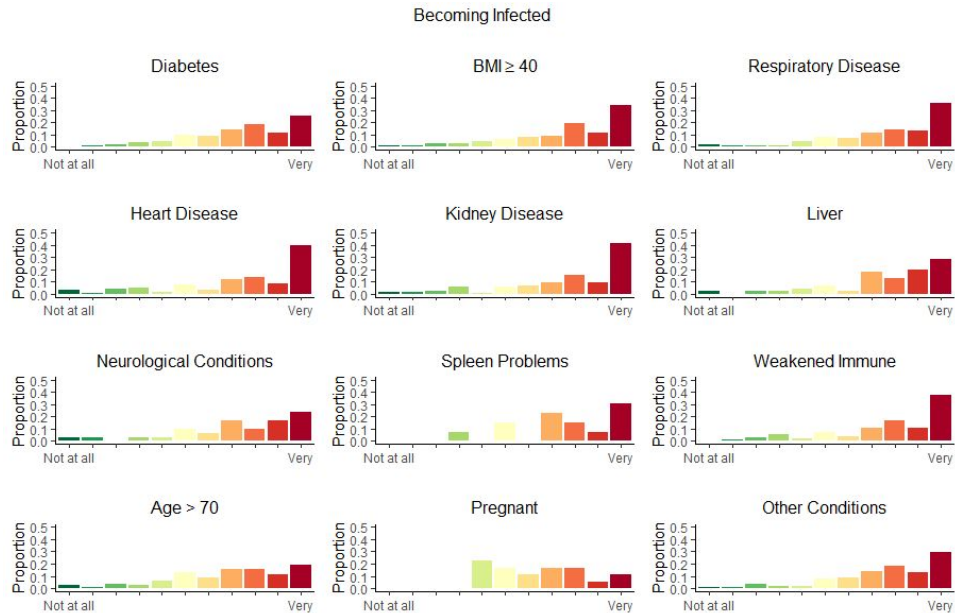

**Supplementary Figure 1:** Concern about becoming infected with COVID-19 for each high-risk indicator as identified by the UK Government, or based on individual perception due to an acute or chronic health condition.

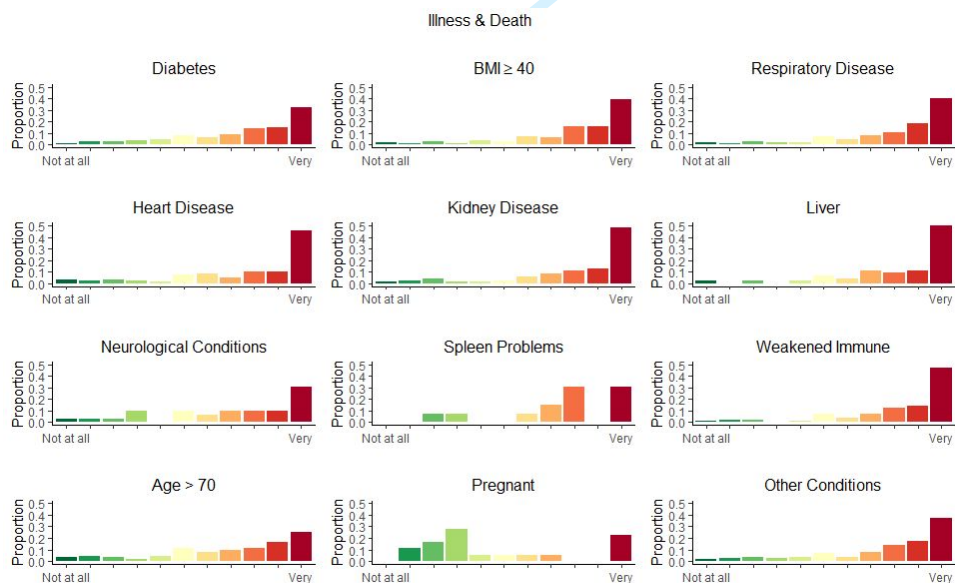

**Supplementary Figure 2:** Concern about severe illness and possible death from COVID-19 for each high-risk indicator as identified by the UK Government, or based on individual perception due to an acute or chronic health condition.

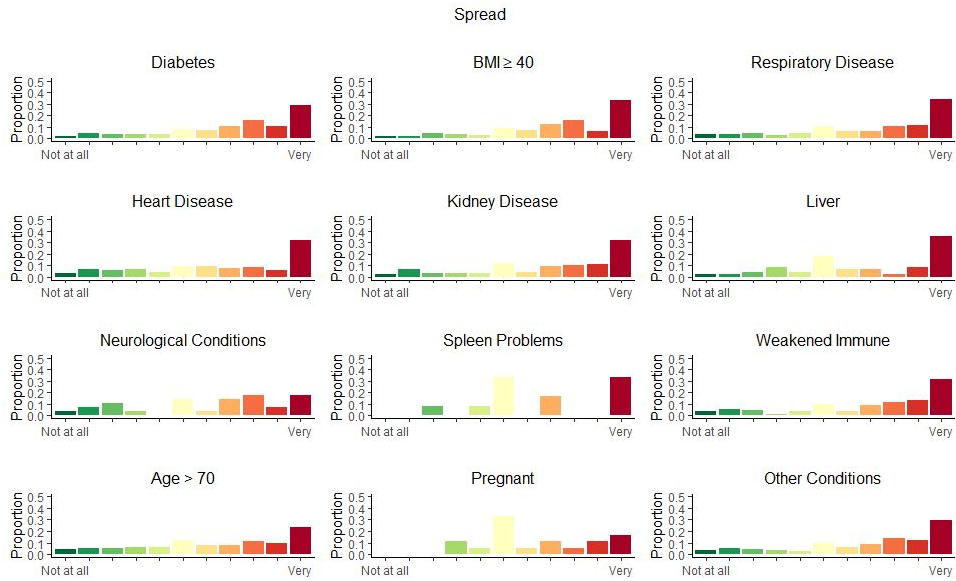

**Supplementary Figure 3:** Concern about spreading COVID-19 to others including family and friends for each high-risk indicator as identified by the UK Government, or based on individual perception due to an acute or chronic health condition.

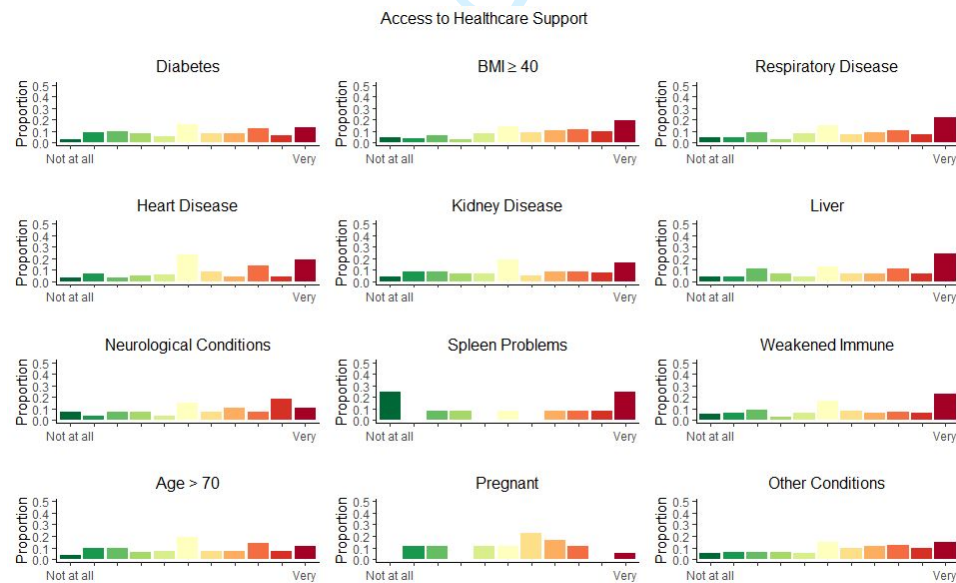

**Supplementary Figure 4:** Concern about access to healthcare support for each high-risk indicator as identified by the UK Government, or based on individual perception due to an acute or chronic health condition.

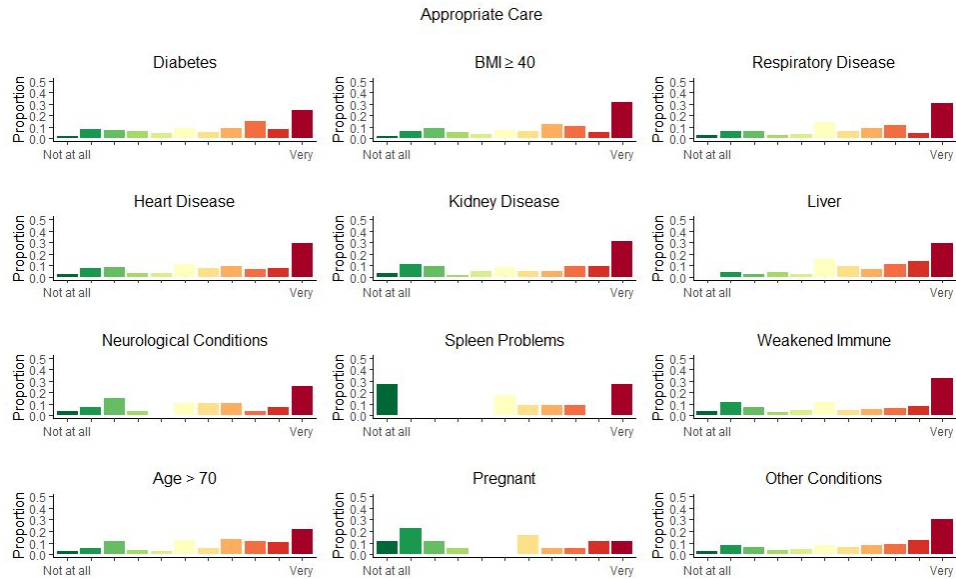

**Supplementary Figure 5:** Concern about access to appropriate care if infected with COVID-19 for each high-risk indicator as identified by the UK Government, or based on individual perception due to an acute or chronic health condition.

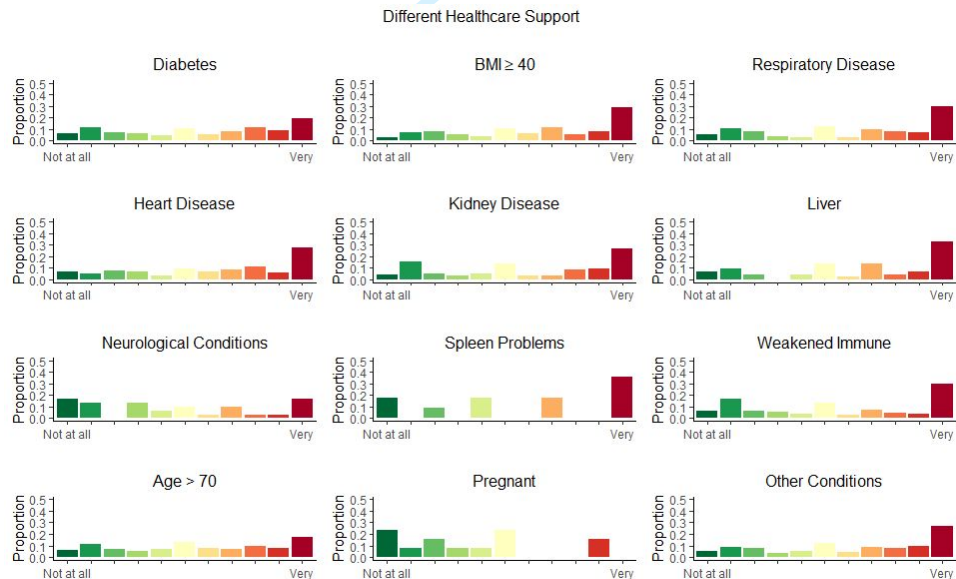

**Supplementary Figure 6:** Concern about disparate care as a result of high-risk status for each indicator as identified by the UK Government, or based on individual perception due to an acute or chronic health condition.

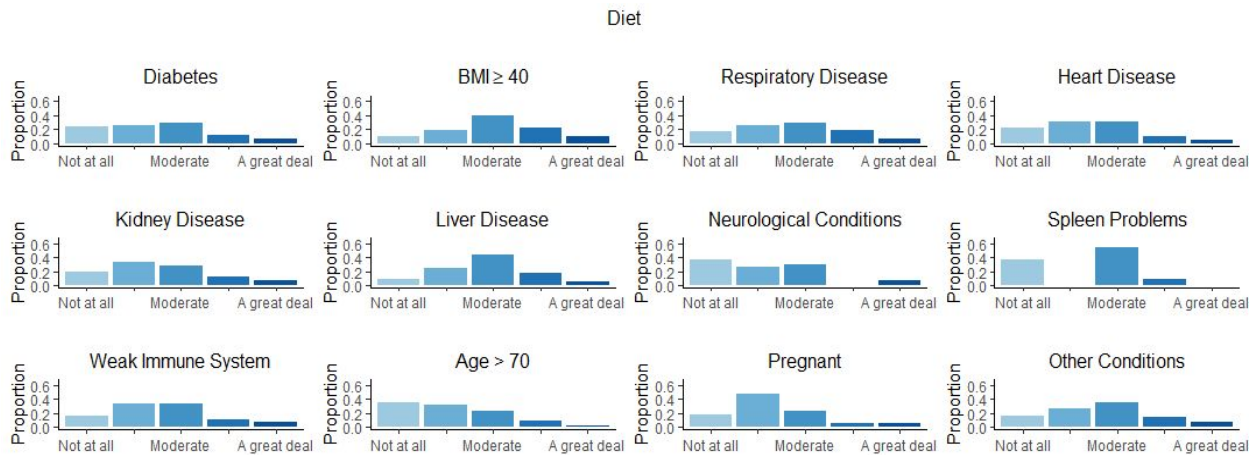

**Supplementary Figure 7.** Change in diet compared to pre-COVID-19 for each high-risk indicator of severe illness from COVID-19 as identified by the UK Government, or based on individual perception due to an acute or chronic health condition.

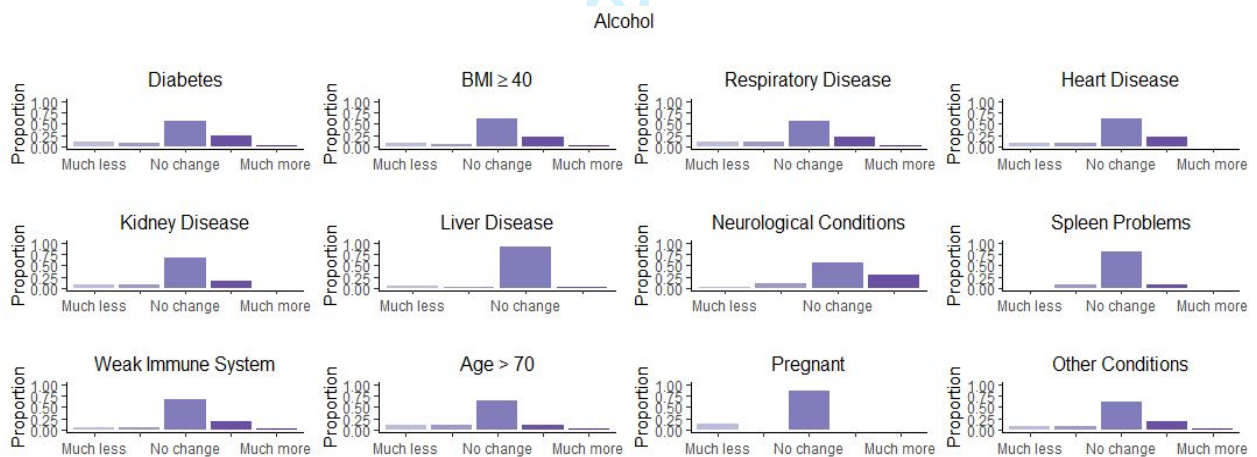

**Supplementary Figure 8.** Change in alcohol consumption compared to pre-COVID-19 for each high-risk indicator of severe illness from COVID-19 as identified by the UK Government, or based on individual perception due to an acute or chronic health condition.

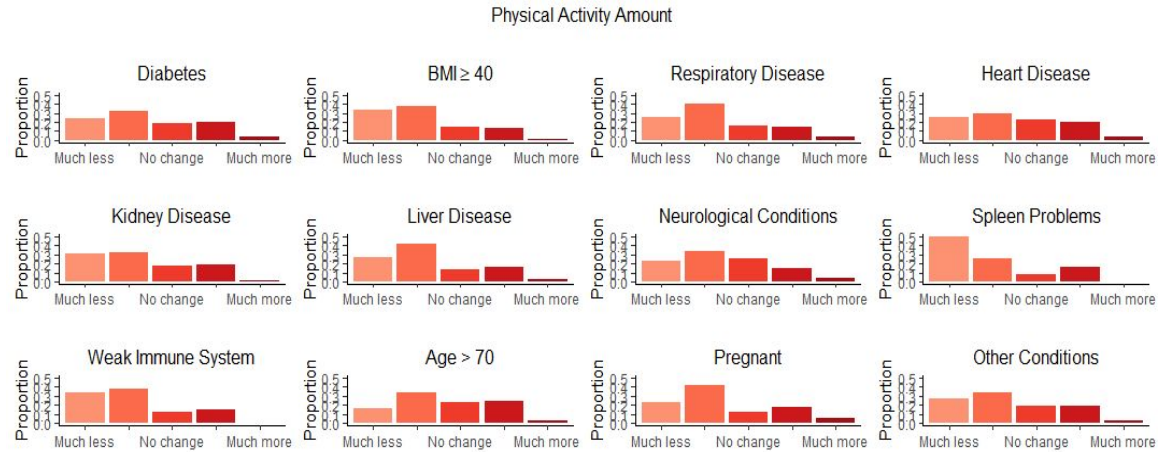

**Supplementary Figure 9.** Change in amount of physical activity compared to pre-COVID-19 for each high-risk indicator of severe illness from COVID-19 as identified by the UK Government, or based on individual perception due to an acute or chronic health condition.

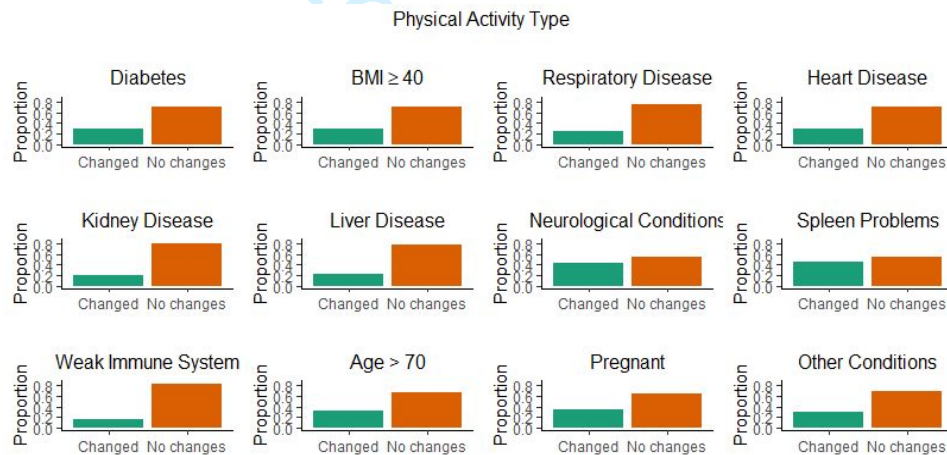

**Supplementary Figure 10.** Change in type of physical activity compared to pre-COVID-19 for each high-risk indicator of severe illness from COVID-19 as identified by the UK Government, or based on individual perception due to an acute or chronic health condition.

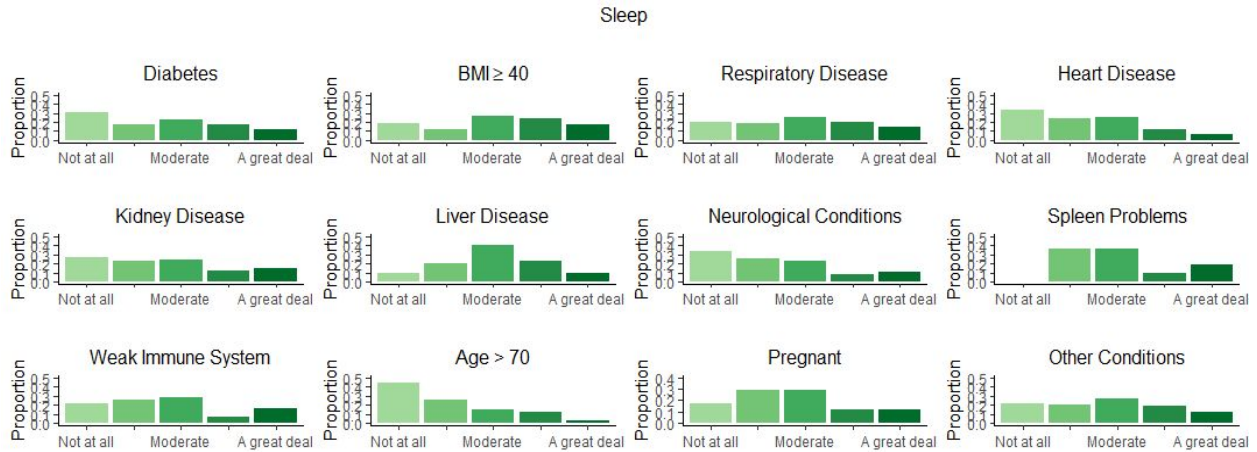

**Supplementary Figure 11.** Change in amount or quality of sleep compared to pre-COVID-19 for each high-risk indicator of severe illness from COVID-19 as identified by the UK Government, or based on individual perception due to an acute or chronic health condition.

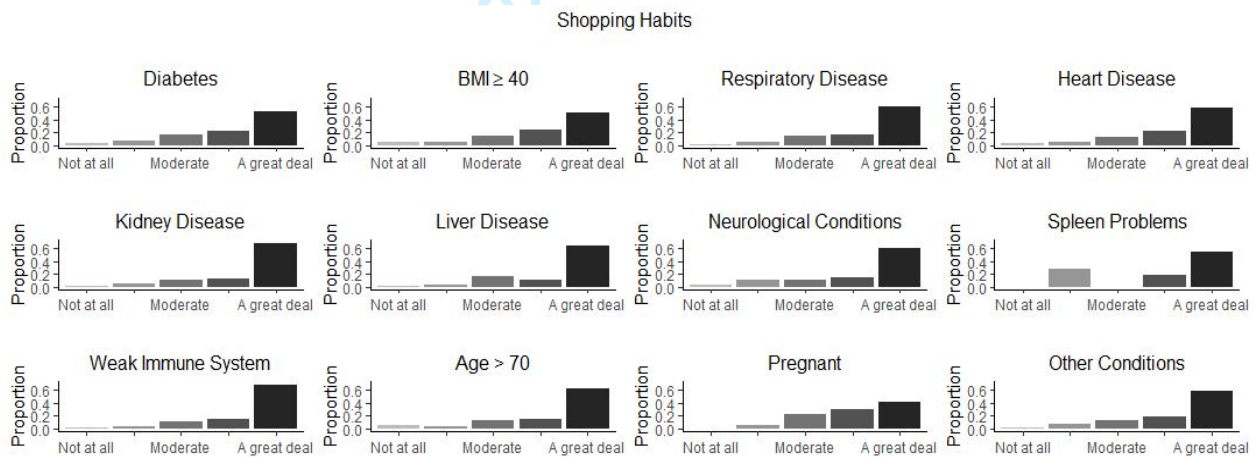

**Supplementary Figure 12.** Change in shopping compared to pre-COVID-19 for each high-risk indicator of severe illness from COVID-19 as identified by the UK Government, or based on individual perception due to an acute or chronic health condition.

# BMJ Open

## A cross-sectional analysis to explore the Awareness, Attitudes and Actions of UK adults at high risk of severe illness from COVID-19

|                                 |                                                                                                                                                                                                                                                                                                             |
|---------------------------------|-------------------------------------------------------------------------------------------------------------------------------------------------------------------------------------------------------------------------------------------------------------------------------------------------------------|
| Journal:                        | <i>BMJ Open</i>                                                                                                                                                                                                                                                                                             |
| Manuscript ID                   | bmjopen-2020-045309.R1                                                                                                                                                                                                                                                                                      |
| Article Type:                   | Original research                                                                                                                                                                                                                                                                                           |
| Date Submitted by the Author:   | 12-Nov-2020                                                                                                                                                                                                                                                                                                 |
| Complete List of Authors:       | Flint, Stuart; University of Leeds Faculty of Medicine and Health, Brown, Adrian; UCL, Medicine; Imperial College London, Medicine Tahrani, Abd; University of Birmingham, Institute of Metabolism and Systems Research<br>Piotrkowicz, Alicja; Scaled Insights<br>Joseph, Anny-Claude; US Military Academy |
| <b>Primary Subject Heading</b>: | Public health                                                                                                                                                                                                                                                                                               |
| Secondary Subject Heading:      | Infectious diseases                                                                                                                                                                                                                                                                                         |
| Keywords:                       | COVID-19, Public health < INFECTIOUS DISEASES, MENTAL HEALTH, DIABETES & ENDOCRINOLOGY                                                                                                                                                                                                                      |
|                                 |                                                                                                                                                                                                                                                                                                             |

SCHOLARONE™  
Manuscripts

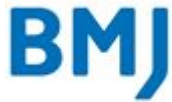

I, the Submitting Author has the right to grant and does grant on behalf of all authors of the Work (as defined in the below author licence), an exclusive licence and/or a non-exclusive licence for contributions from authors who are: i) UK Crown employees; ii) where BMJ has agreed a CC-BY licence shall apply, and/or iii) in accordance with the terms applicable for US Federal Government officers or employees acting as part of their official duties; on a worldwide, perpetual, irrevocable, royalty-free basis to BMJ Publishing Group Ltd ("BMJ") its licensees and where the relevant Journal is co-owned by BMJ to the co-owners of the Journal, to publish the Work in this journal and any other BMJ products and to exploit all rights, as set out in our [licence](#).

The Submitting Author accepts and understands that any supply made under these terms is made by BMJ to the Submitting Author unless you are acting as an employee on behalf of your employer or a postgraduate student of an affiliated institution which is paying any applicable article publishing charge ("APC") for Open Access articles. Where the Submitting Author wishes to make the Work available on an Open Access basis (and intends to pay the relevant APC), the terms of reuse of such Open Access shall be governed by a Creative Commons licence – details of these licences and which [Creative Commons](#) licence will apply to this Work are set out in our licence referred to above.

Other than as permitted in any relevant BMJ Author's Self Archiving Policies, I confirm this Work has not been accepted for publication elsewhere, is not being considered for publication elsewhere and does not duplicate material already published. I confirm all authors consent to publication of this Work and authorise the granting of this licence.



1  
2  
3 **A cross-sectional analysis to explore the Awareness, Attitudes and Actions of UK adults at high**  
4 **risk of severe illness from COVID-19**  
5  
6

7 Stuart W. Flint,<sup>1,2</sup> Adrian Brown,<sup>3,4</sup> Abd A. Tahrani,<sup>5,6,7</sup> Alicja Piotrkowicz,<sup>2,8</sup> Anny-Claude Joseph,<sup>9</sup>  
8  
9

10 <sup>1</sup>School of Psychology, University of Leeds, Leeds, UK  
11

12 <sup>2</sup>Scaled Insights, Nexus, Leeds, UK  
13

14 <sup>3</sup>Centre for Obesity Research, University College London, London, UK  
15

16 <sup>4</sup>National Institute of Health Research, University College London, London, UK  
17

18 <sup>5</sup>Institute of Metabolism and Systems Research, University of Birmingham, Birmingham, UK  
19

20 <sup>6</sup>Department of Diabetes and Endocrinology, University Hospitals Birmingham NHS Foundation Trust,  
21 Birmingham, UK

22 <sup>7</sup>Centre for Endocrinology, Diabetes and Metabolism, Birmingham Health Partners, Birmingham, UK  
23

24 <sup>8</sup>School of Computing, University of Leeds, Leeds, UK  
25

26 <sup>9</sup>Department of Mathematical Sciences, US Military Academy, West Point, NY, USA  
27  
28

29 Contact details: Dr Stuart W. Flint, School of Psychology, University of Leeds, Leeds, UK, LS2 9JT;  
30 [s.w.flint@leeds.ac.uk](mailto:s.w.flint@leeds.ac.uk)  
31  
32  
33  
34  
35

36 Word Count: 4982  
37  
38  
39  
40  
41  
42  
43  
44  
45  
46  
47  
48  
49  
50  
51  
52  
53  
54  
55  
56  
57  
58  
59  
60

## Abstract

### *Objectives*

This study explored the impact of COVID-19 on people identified as at high risk of severe illness by UK Government, and in particular, the impact of lockdown on access to healthcare, medications and use of technological platforms.

### *Design*

Online survey methodology

### *Setting*

UK

### *Participants*

1038 UK adults were recruited who were either identified by UK Government as at high risk of severe illness from COVID-19 or self-identified as at high risk with acute or other chronic health conditions not included in the UK Government list. Participants were recruited through social media advertisements, health charities and patient organisations.

### *Main outcomes measures*

The Awareness, Attitudes and Actions survey which explores the impact of COVID-19, on including access to healthcare, use of technology for health condition management, mental health, depression, wellbeing, and lifestyle behaviours.

### *Results*

Nearly half of the sample (44.5%) reported that their mental health had worsened during the COVID-19 lockdown. Management of health conditions changed including access to medications (28.5%) and delayed surgery (11.9%), with nearly half of the sample using telephone care (45.5%). Artificial Intelligence identified that participants in the negative cluster had higher neuroticism, insecurity and negative sentiment. Participants in this cluster reported more negative impacts on lifestyle behaviours, higher depression and lower wellbeing, alongside lower satisfaction with platforms to deliver healthcare.

### *Conclusions*

This study provides novel evidence of the impact of COVID-19 on people identified as at high risk of severe illness. These findings should be considered by policymakers and healthcare professionals to avoid unintended consequences of continued restrictions and future pandemic responses.

*Keywords: COVID-19; Lockdown; Attitudes; Behaviours; Artificial Intelligence; High Risk*

## Article Summary

### *Strengths and limitations of this study*

- This study collected data during the COVID-19 lockdown, exploring the impact on a high-risk subsection of the population who have been subject to greater restrictions.
- The study collected novel data on the impact of the UK national lockdown on access to healthcare, lifestyle behaviours, and mental health.
- An innovative Artificial Intelligence tool was used to provide further insights about the impact of COVID-19 lockdown on this vulnerable population.
- The study used an online survey methodology and as such may have excluded recruitment of people experiencing digital poverty.
- Given the reported increased risk for people from black and minority ethnic (BAME) backgrounds, the low recruitment of people from BAME backgrounds means that comparison of the impact on people of different ethnic backgrounds was not possible.

## Introduction

On 11<sup>th</sup> March 2020, the World Health Organization (WHO) announced that coronavirus disease 2019 (COVID-19) was a global pandemic.<sup>1</sup> In response, governments across the world took a range of actions to help reduce its spread including the development of legislation and policies. The majority of countries also imposed a period of a variable degree of “lockdown”.

Beyond the population level lockdown, further guidance was issued for people identified as at a higher risk of morbidity and mortality from COVID-19. This ‘high risk’ grouping was typically comprised of people living with chronic health conditions such as diabetes, heart disease or acquired immunodeficiency syndrome (AIDS), as well as people who are pregnant or aged 60 years or over. For some 2.2 million people, this additional guidance included the need to ‘shield’ for people identified as the most vulnerable to COVID-19 infection and illness.<sup>2</sup> However, unintended consequences have been noted in emerging evidence, including accentuated feelings of social isolation, self-stigma and loneliness.<sup>3,4</sup> Thus far, the impact of lockdown and associated restrictions have primarily been reported within the general population, however, given the greater restrictions on people identified as at higher risk including a longer duration of lockdown and need to ‘shield’ or self-isolate, the potential impact of COVID-19 is likely to have been greater on this sub-group of the population. Recently, the Office of National Statistics<sup>2</sup> reported that a high proportion of people identified as being at high risk self-reported that they followed the shielding guidance completely during lockdown.

There is a pressing need to investigate the impact of lockdown and shielding on people identified as at higher risk of severe illness from COVID-19. We defined impact as changes as a consequence of shielding to different aspects of everyday life, including actions and attitudes, healthcare delivery, mental health and wellbeing, lifestyle behaviours, and social interaction. Some of these aspects such as access to healthcare delivery, have not been investigated for this population previously. In terms of attitudes and actions, emerging evidence from the US suggests that despite concerns about infection, there was a lack of critical knowledge and limited changes to the plans or routines for people identified as at high risk of severe illness from COVID-19 infection.<sup>5</sup>

Therefore, to understand the impact, and contribute evidence for healthcare policy and networks to support people effectively and address unmet needs, we have delivered a time-sensitive study of the impact the COVID-19 pandemic and the associated UK Government guidance has had on people identified as at high risk of severe illness from COVID-19. Specifically, we explored the impact of the COVID-19 lockdown on access to healthcare, health and lifestyle behaviours, and mental health amongst UK adults identified as at high risk of severe illness from COVID-19.

## Methods

### *Design*

Between 15 March and 31 May 2020, the Awareness, Attitudes and Actions (AAA) survey was disseminated via UK charities, healthcare and relevant higher education email distribution lists, social media, and website advertisement. The survey was hosted by Qualtrics LLC; a third-party online survey administration platform. Inclusion criteria was being aged  $\geq 18$  years with one or more of the factors for high risk of severe illness from COVID-19 identified by the UK Government or self-identified as at high risk due to an acute or chronic health condition not listed.<sup>6</sup>

### *AAA Survey*

An online survey was developed to explore the AAA of UK adults identified as at high risk of severe illness from COVID-19 by the UK Government or self-identified as high risk. The survey comprised of seven sections utilising a combination of closed and open questions:

- 1) participant demographics,
- 2) awareness, attitudes and actions relating to COVID-19 including whether participants had been diagnosed with COVID-19, experienced symptoms, and took actions to reduce infection and spread,
- 3) impact of COVID-19 on management of health conditions and use of technology,

1  
2  
3 4) impact on mental health and wellbeing, and depression including the Warwick-Edinburgh Mental  
4 Well-being Scale (WEMWBS)<sup>7</sup> and Patient Health Questionnaire (PHQ-9)<sup>8</sup>

5  
6 5) lifestyle related behaviours; diet, alcohol intake, physical activity type and amount, sleep quality and  
7 amount, smoking behaviour, e-cigarette use and recreational drug use,

8  
9 6) interaction with others regarding changes in other people's behaviour towards participants and  
10 feeling stigmatised and discriminated,

11 7) additional comments.

12 Please see Supplementary Materials for an overview of the online survey.

### 13 *Patient and Public Involvement*

14  
15  
16 Patients and Public were involved from the outset and throughout the study, including the design,  
17 conducting, choice, development and piloting of the AAA survey, recruitment and reporting of the  
18 study.

### 19 *Data analysis*

20  
21 Data from this survey produced quantitative and text data from validated questionnaires, and closed and  
22 open-ended questions.

23  
24 For the statistical analysis, we fit generalised linear models to the data. Participant responses were used  
25 to calculate the WEMWBS and PHQ-9 scores for well-being and depression, respectively. We imputed  
26 missing values for participants who did not respond to all items needed to calculate WEMWBS and  
27 PHQ-9 scores. If a participant responded to at least 11 of the 14 WEMWBS items or at least 7 of the 9  
28 PHQ-9 items, we used the mean value of the participant's responses in place of missing values.  
29 WEMWBS, PHQ-9, and concerns regarding COVID-19 were treated as continuous outcomes. Logistic  
30 regression models were used to model 1) actions taken to mitigate the risk of contracting COVID-19,  
31 2) the impact of COVID-19 on the management of health conditions, and 3) the technology platforms  
32 used to receive health care. Responses regarding the impact of COVID-19 on lifestyle related  
33 behaviours were modelled using multinomial and Adjacent Category Logit models assuming  
34 proportional odds. Odds ratios (OR) and 95% confidence intervals (CI) were reported for logistic,  
35 multinomial, and Adjacent Category Logit models.

36  
37  
38 Each response was modelled as a function of the indicators for high risk of severe illness from COVID-  
39 19 (12 separate binary variables) which included: diabetes; Body Mass Index (BMI)  $\geq 40\text{kg/m}^2$ ; chronic  
40 respiratory disease; chronic heart disease; chronic kidney disease (CKD); chronic liver disease; chronic  
41 neurological conditions; spleen problems; weakened immune system; aged over 70 years; pregnant; and  
42 other, which included short or long-term health conditions. Other covariates in the models were the  
43 participant's gender (male or female), age (in years), BMI (numeric), Index of Multiple Deprivation  
44 (IMD; numeric: 1-10 as identified using the English Indices of Deprivation 2019), and whether the  
45 participant had multiple indicators for high risk (categorical: one, two, three or more conditions).  
46 Descriptive data were summarised with mean (standard deviations [SD]) or median (interquartile range  
47 [IQR]) for continuous data depending on data distribution, with categorical data summarised as counts  
48 (percentage, %). In each scenario, the reference group consisted of participants who do not belong to  
49 the specified high risk group. All statistical analyses were performed using the tidyverse (version 1.3.0)<sup>9</sup>  
50 and VGAM (version 1.1-2)<sup>10</sup> packages in R (version 3.6.2).<sup>11</sup> Statistical significance was defined at p-  
51 value  $<0.05$ .

52  
53  
54 Text data was collected across 17 open-ended questions which were distributed throughout the survey  
55 sections. The language sample for each participant was processed to derive sentiment scores and  
56 personality scores. VADER Sentiment Analysis tool<sup>12</sup> was used to obtain sentiment scores (positive,  
57 neutral, negative, and compound sentiment). Personality scores were obtained using proprietary  
58 software by Scaled Insights. The software takes as input a language sample and produces 114  
59 personality features. Following this, the 118 features (114 personality, 4 sentiment) were used as  
60 input into the multiple machine learning models, which were used in two settings:

1  
2  
3  
4  
5  
6  
7  
8  
9  
10  
11  
12  
13  
14  
15  
16  
17  
18  
19  
20  
21  
22  
23  
24  
25  
26  
27  
28  
29  
30  
31  
32  
33  
34  
35  
36  
37  
38  
39  
40  
41  
42  
43  
44  
45  
46  
47  
48  
49  
50  
51  
52  
53  
54  
55  
56  
57  
58  
59  
60

unsupervised (clustering) and supervised (classification or regression). We also investigated to what extent features obtained from a language sample are predictive of concerns, mitigating actions, impact on lifestyle behaviours, and wellbeing and depression scores in the context of COVID-19. For further details and an overview of the prediction models see the supplementary materials and supplementary tables 1-4 for the outcomes of the models.

### *Patient and Public Involvement*

Patients and Public were involved from the outset and throughout the study, including the design, conducting, choice, development and piloting of the AAA survey, recruitment and reporting of the study. We are very grateful for the organisations and individuals as listed in our acknowledgements section who have and continue to support this study.

A public facing report of the study will be provided to the organisations that have supported our study once the manuscript has been published, and all study participants are able to request a copy of the final report and manuscript once published.

## **Results**

### *Descriptive Statistics*

The original sample comprised 1038 UK adults. Six participants were removed for either reporting being aged less than 18 years old or an infeasible age. Of the remaining sample, 624 were female, 402 male, 4 reported other and 2 preferred not to say. Due to small numbers, participants who responded 'other' or 'prefer not to say' when asked about their gender were removed. Characteristics of the 1026 participants in the final analysis are presented in Table 1. Six hundred and twenty-four (61%) participants were female; 979 (95.4%) identified as White-British, Irish, other; with a mean age of 54.6  $\pm$  14.9 years and mean BMI of 28.8  $\pm$  8.1 kg/m<sup>2</sup>. Two hundred and nineteen participants (21.3%) reported having three or more indicators for high risk of severe illness from COVID-19 as identified by the UK Government, or based on individual perception due to an acute or chronic health condition. The 12 high risk indicators are summarised in Table 1. Notably over half of the sample (n=528; 52.4%) reported that they were living with diabetes (either Type 1 or Type 2). Participants reported high concern about infection, illness and death, spread to others, and access to healthcare across all higher risk groups (see supplementary materials for statistical analysis of COVID-19 concerns, risk mitigating behaviour and interactions with others).

### *Impact of COVID-19 on Lifestyle Related Behaviours*

Supplementary Figures 1-6 display the impact of COVID-19 on lifestyle related behaviours for each high-risk indicator of severe illness from COVID-19. Generally, across all high-risk indicators a high proportion of participants indicated little to moderate change in diet, no change in alcohol consumption, less or much less physical activity, no change in the type of physical activity, and a great deal of change in shopping habits. Change in quality and amount of sleep was variable across risk groups.

Further analysis of lifestyle related behaviours compared to prior to COVID-19 lockdown suggested that women and participants with CKD were more likely to report greater change in their shopping habits compared to those without CKD (OR 1.18, CI (1.02, 1.38) and 1.62, CI (1.01, 2.60) respectively); see Supplementary Table 5. Participants were less likely to report greater changes in their diet for each additional year of age [OR 0.99, CI (0.98, 1.00)], whereas participants with higher BMI and women reported greater change in their diet (OR 1.02 per additional kg/m<sup>2</sup>, CI (1.00, 1.03) and OR 1.19, CI (1.02, 1.39) respectively). Furthermore, participants with either chronic respiratory disease, CKD, weakened immune systems, or a higher BMI were less likely to report greater change in the amount of physical activity they engaged in compared to those who did not belong to any of these high-risk groups (OR 0.70, CI (0.50, 0.97); OR 0.65, CI (0.44, 0.96); OR 0.54, CI (0.37, 0.78); and OR 0.98 per additional

kg/m<sup>2</sup>, CI (0.97, 1.00), respectively). In addition, individuals with chronic neurological conditions were less likely to report a change in the type of physical activity they engaged in (OR 0.23, CI (0.06, 1.00)).

### *Impact of COVID-19 on Mental Health, Wellbeing & Depression*

Four hundred and forty-five (49.8%) participants indicated that their self-reported mental health was about the same compared to prior to COVID-19 lockdown (Table 2). Women were more likely to report worsening of their mental health (OR 2.09, CI (1.02, 4.29)) whereas participants > 70 years old were less likely to report worsening of their mental health (OR 0.16, CI (0.03, 0.86)). Specifically, for each additional year of age, participants were more likely to report that their mental health had been impacted less negatively during COVID-19 lockdown (OR 1.04, CI (1.01, 1.08))

For all participants, mean wellbeing (WEMWBS) was  $44.9 \pm 11.3$  – lower than the population wellbeing norm – and participants on average reported mild depression (PHQ-9) of  $7.53 \pm 6.11$ . For median wellbeing and depression scores based on high risk group, see Supplementary Table 6.

#### *Wellbeing*

Participants who were older reported statistically higher wellbeing (WEMWBS). For each additional year, wellbeing increased by 0.25 ( $p < 0.001$ ). By contrast, women reported wellbeing that was 1.75 lower than those of men ( $p = 0.048$ ).

#### *Depression*

Pregnant women and older participants reported lower depression (PHQ-9), with pregnant women reporting scores 4.41 points lower than women who were not pregnant ( $p = 0.013$ ), whereas for each additional year of age there was a reduction in depression by 0.14 points ( $p < 0.001$ ). In addition, participants' weight impacted depression, with each unit increase in BMI, there was an increase of depression by 0.09; gender impacted depression with women reporting an average depression score that was 1.41 points higher than men; and participants with three or more indicators of high-risk reported greater depression with a mean increase of 4.78 compared to those with only one high-risk indicator ( $p < 0.05$  for all factors).

**Table 1.** Demographics characteristics of participants in the AAA survey.

| <b>Participant Characteristics<sup>1</sup></b>                      |             |
|---------------------------------------------------------------------|-------------|
| <b>Age<sup>2</sup> mean (SD; years)</b>                             | 54.6 ± 14.9 |
| <b>BMI<sup>2</sup> mean (SD; kg/m<sup>2</sup>; n = 1003)</b>        | 28.8 ± 8.1  |
| <b>Index of Multiple Deprivation<sup>2</sup> mean (SD, n = 759)</b> | 5.33 ± 2.7  |
| <b>Gender n (%)</b>                                                 |             |
| Male                                                                | 402 (39.2%) |
| Female                                                              | 624 (60.8%) |
| <b>Ethnicity n (%)</b>                                              |             |
| White - British, Irish, other                                       | 979 (95.4%) |
| Black/Black British - Caribbean, African, other                     | 8 (0.8%)    |
| Chinese/Chinese British                                             | 2 (0.2%)    |

|    |                                                                  |             |
|----|------------------------------------------------------------------|-------------|
| 1  |                                                                  |             |
| 2  |                                                                  |             |
| 3  | Middle Eastern/Middle Eastern British - Arab, Turkish, other     | 2 (0.2%)    |
| 4  |                                                                  |             |
| 5  | Mixed race -other                                                | 5 (0.5%)    |
| 6  |                                                                  |             |
| 7  | Mixed race - White and Black/Black British                       | 3 (0.3%)    |
| 8  |                                                                  |             |
| 9  | Other ethnic groups                                              | 7 (0.7%)    |
| 10 | <b>Health or social care worker (n=1025) n (%)</b>               |             |
| 11 |                                                                  |             |
| 12 | Yes                                                              | 150 (14.6%) |
| 13 |                                                                  |             |
| 14 | No                                                               | 875 (85.3%) |
| 15 | <b>Job requires contact with COVID-19 patients (n=144) n (%)</b> |             |
| 16 |                                                                  |             |
| 17 | Yes                                                              | 39 (3.8%)   |
| 18 |                                                                  |             |
| 19 | No                                                               | 105 (10.2%) |
| 20 | <b>Diabetes n (%)</b>                                            |             |
| 21 |                                                                  |             |
| 22 | Yes                                                              | 538 (52.4%) |
| 23 |                                                                  |             |
| 24 | No                                                               | 488 (47.6%) |
| 25 | <b>BMI <math>\geq</math> 40 kg/m<sup>2</sup> n (%)</b>           |             |
| 26 |                                                                  |             |
| 27 | Yes                                                              | 142 (13.8%) |
| 28 |                                                                  |             |
| 29 | No                                                               | 884 (86.2%) |
| 30 | <b>Chronic Respiratory Disease n (%)</b>                         |             |
| 31 |                                                                  |             |
| 32 | Yes                                                              | 179 (17.4%) |
| 33 |                                                                  |             |
| 34 | No                                                               | 847 (82.6%) |
| 35 | <b>Chronic Heart Disease n (%)</b>                               |             |
| 36 |                                                                  |             |
| 37 | Yes                                                              | 132 (12.9%) |
| 38 |                                                                  |             |
| 39 | No                                                               | 894 (87.1%) |
| 40 | <b>Chronic Kidney Disease n (%)</b>                              |             |
| 41 |                                                                  |             |
| 42 | Yes                                                              | 147 (14.3%) |
| 43 |                                                                  |             |
| 44 | No                                                               | 879 (85.7%) |
| 45 | <b>Chronic Liver Disease n (%)</b>                               |             |
| 46 |                                                                  |             |
| 47 | Yes                                                              | 49 (4.8%)   |
| 48 |                                                                  |             |
| 49 | No                                                               | 977 (95.2%) |
| 50 | <b>Chronic Neurological Conditions n (%)</b>                     |             |
| 51 |                                                                  |             |
| 52 | Yes                                                              | 35 (3.4%)   |
| 53 |                                                                  |             |
| 54 | No                                                               | 991 (96.6%) |
| 55 | <b>Spleen problems n (%)</b>                                     |             |
| 56 |                                                                  |             |
| 57 | Yes                                                              | 16 (1.6%)   |
| 58 |                                                                  |             |
| 59 |                                                                  |             |
| 60 |                                                                  |             |



|                                         |              |
|-----------------------------------------|--------------|
| No                                      | 1010 (98.4%) |
| <b>Weakened immune system n (%)</b>     |              |
| Yes                                     | 159 (15.5%)  |
| No                                      | 867 (84.5%)  |
| <b>Aged &gt; 70 years n (%)</b>         |              |
| Yes                                     | 178 (17.3%)  |
| No                                      | 848 (82.7%)  |
| <b>Pregnant n (%)</b>                   |              |
| Yes                                     | 21 (2.0%)    |
| No                                      | 1005 (98.0%) |
| <b>Other risk factors* n (%)</b>        |              |
| Yes                                     | 303 (29.5%)  |
| No                                      | 723 (70.5%)  |
| <b>Number of high-risk groups n (%)</b> |              |
| 1                                       | 471 (45.9%)  |
| 2                                       | 336 (32.7%)  |
| 3+                                      | 219 (21.3%)  |

1. n = 1026 except where otherwise specified; 2. Mean and standard deviation; SD=standard deviation; N=number; %=percentage

\* Short- or long-term health conditions e.g. mental health

**Table 2.** Summary of Warwick-Edinburgh Mental Well-being Scale (WEMWBS) and Patient Health Questionnaire (PHQ-9) scores and changes in self-reported mental health compared to pre-COVID-19.

| <b>Participant response</b>                                 |             |
|-------------------------------------------------------------|-------------|
| <b>WEMWBS<sup>1</sup> (n = 922)</b>                         | 44.9 ± 11.3 |
| <b>PHQ-9<sup>1</sup> (n = 927)</b>                          | 7.53 ± 6.11 |
| <b>Mental health changes since COVID-19 (n = 893) n (%)</b> |             |
| Worse                                                       | 397 (44.5%) |
| About the same                                              | 445 (49.8%) |
| Better                                                      | 51 (5.7%)   |

1. Mean and standard deviation

*Impact on Management of Health Conditions and Use of Technology*

The impact of COVID-19 on the delivery of care for those with high-risk indicators is summarised in Table 3. Six hundred and eighty-two (66.5%) participants indicated changes to their regular healthcare appointments, while 199 (19.4%) participants indicated that there were no changes to regular healthcare support during the COVID-19 lockdown.

Participants with chronic liver disease were more likely to report change to management of health conditions compared to prior to the COVID-19 lockdown (OR 3.15, CI (1.29, 8.01)); see Supplementary Table 7. Participants with either diabetes, weakened immune systems or liver disease were more likely to report change to appointments (OR 2.40, CI (1.11, 5.75); OR 2.90, CI (1.18, 7.93); and OR 3.48, CI (1.16, 12.16), respectively); whereas participants with spleen problems had a greater likelihood of reporting changes to their medications (OR 7.10, CI (1.45, 53.03)). For each additional year of age, participants were more likely to report changes to elective surgery and their clinician (OR 1.03, CI (1.01, 1.06) and OR 1.03, CI (1.01, 1.05), respectively). However, participants who were > 70 years old were less likely to report other changes to regular healthcare support beyond those specified in the survey (OR 0.24, CI (0.05, 0.88)).

Four hundred and sixty-seven (45.5%) participants indicated that their care changed to using telephone support, while 321 (31.3%) reported that they did not use any of the platforms specified in the survey (Table 3). Participants > 70 years were less likely to use the telephone to receive care (OR 0.46, CI (0.21, 0.99)). Participants living with liver disease were more likely to use social media (OR 5.91, CI (1.62, 20.84)). In addition, participants with liver disease were more likely to report using virtual consultation platforms; as were participants with neurological conditions (OR 4.39, CI (1.41, 13.20) and OR 3.56, CI (1.06, 10.98), respectively). By contrast, women were less likely to use virtual consultation platforms compared to men (OR 0.56, CI (0.32, 0.98)). For each additional year in age, participants were less likely to use emails (OR 0.98, CI (0.96, 1.00)). When asked whether participants were satisfied with the support platforms and with the information received during the COVID-19 lockdown, the majority reported either being somewhat or extremely satisfied (40.3%, 39.6%, respectively; Table 3).

Four hundred and sixty-six (45.4%) participants indicated that they would welcome continued use of the platforms used during COVID-19 lockdown. When comparing gender, women were less satisfied with the platform they used (OR 0.84, CI (0.72, 0.99)); however, the level of satisfaction with using the information provided through the platform was similar across all groups. Age appeared to impact whether participants wished to continue to use the healthcare platform after COVID-19 lockdown (OR 1.03 for each additional year of age, CI (1.01, 1.06)). While those with greater social deprivation appeared to be unsure about continuing to use the platform (OR 1.10 for each increased in IMD, CI (1.02, 1.19)).

**Table 3.** Summary of participant changes to clinical management during COVID-19 lockdown.

|                                                      | <b>Percent Identifying<br/>(n = 1026)</b> |
|------------------------------------------------------|-------------------------------------------|
| <b>Changes to regular healthcare support?* n (%)</b> |                                           |
| Appointments                                         | 682 (66.5%)                               |
| Medication                                           | 292 (28.5%)                               |
| Elective surgery                                     | 122 (11.9%)                               |
| Communication platform                               | 183 (17.8%)                               |

|    |                                                                                           |             |
|----|-------------------------------------------------------------------------------------------|-------------|
| 1  |                                                                                           |             |
| 2  |                                                                                           |             |
| 3  | Clinician                                                                                 | 196 (19.1%) |
| 4  |                                                                                           |             |
| 5  | Other                                                                                     | 83 (8.1%)   |
| 6  |                                                                                           |             |
| 7  | No change                                                                                 | 199 (19.4%) |
| 8  | <b>Platforms used to receive care n (%)</b>                                               |             |
| 9  |                                                                                           |             |
| 10 | Social media                                                                              | 63 (6.1%)   |
| 11 |                                                                                           |             |
| 12 | Mobile phone app                                                                          | 97 (9.5%)   |
| 13 |                                                                                           |             |
| 14 | Email                                                                                     | 146 (14.2%) |
| 15 |                                                                                           |             |
| 16 | Telephone                                                                                 | 467 (45.5%) |
| 17 |                                                                                           |             |
| 18 | Virtual consultation                                                                      | 90 (8.8%)   |
| 19 |                                                                                           |             |
| 20 | Other                                                                                     | 46 (4.5%)   |
| 21 |                                                                                           |             |
| 22 | No platforms                                                                              | 321 (31.3%) |
| 23 |                                                                                           |             |
| 24 | Face to face care                                                                         | 35 (3.4%)   |
| 25 | <b>How satisfied are you with the platforms? (n =860) n (%)</b>                           |             |
| 26 |                                                                                           |             |
| 27 | Extremely dissatisfied                                                                    | 51 (5.0%)   |
| 28 |                                                                                           |             |
| 29 | Somewhat dissatisfied                                                                     | 92 (9.0%)   |
| 30 |                                                                                           |             |
| 31 | Neither satisfied nor dissatisfied                                                        | 303 (29.5%) |
| 32 |                                                                                           |             |
| 33 | Somewhat satisfied                                                                        | 234 (22.8%) |
| 34 |                                                                                           |             |
| 35 | Extremely satisfied                                                                       | 180 (17.5%) |
| 36 | <b>How satisfied are you with using information received via platforms? (n=867) n (%)</b> |             |
| 37 |                                                                                           |             |
| 38 | Extremely dissatisfied                                                                    | 41 (4.0%)   |
| 39 |                                                                                           |             |
| 40 | Somewhat dissatisfied                                                                     | 114 (11.1%) |
| 41 |                                                                                           |             |
| 42 | Neither satisfied nor dissatisfied                                                        | 306 (29.8%) |
| 43 |                                                                                           |             |
| 44 | Somewhat satisfied                                                                        | 255 (24.9%) |
| 45 |                                                                                           |             |
| 46 | Extremely satisfied                                                                       | 151 (14.7%) |
| 47 | <b>Use platforms after COVID-19? (n = 875) n (%)</b>                                      |             |
| 48 |                                                                                           |             |
| 49 | No                                                                                        | 154 (15.0%) |
| 50 |                                                                                           |             |
| 51 | No, but would welcome other platforms                                                     | 81 (7.9%)   |
| 52 |                                                                                           |             |
| 53 | Not sure, I need more time to use them                                                    | 174 (17.0%) |
| 54 |                                                                                           |             |
| 55 | Yes                                                                                       | 466 (45.4%) |

*n = 1026 except where otherwise specified.*

*\* Changed type or frequency of support*

### *Concerns about COVID-19*

A large proportion of participants in each high-risk group reported that they were 'very concerned' to statements about infection, spread and potential impact of COVID-19; see Supplementary Figure 7-12.

Participants with either chronic respiratory disease, chronic heart disease, CKD, other acute/chronic diseases, diabetes, or weakened immune systems were more concerned about becoming infected compared to those who did not belong to any of these high-risk groups ( $p < 0.05$ ). The coefficients for these covariates suggest that participants in either of these high-risk groups selected the next highest response compared to individuals who believed they were not at high risk. Additionally, concerns about being infected were significantly higher for women than in men (difference 0.59;  $p = 0.003$ ), and for older participants (difference 0.02;  $p=0.032$ ), although the differences were relatively small. Participants with either chronic respiratory disease, chronic heart disease, CKD, BMI  $\geq 40$ , or weakened immune systems were more concerned about experiencing severe illness or death (next highest response) compared to those who did not belong to these high-risk groups ( $p < 0.05$ ); whereas pregnant women were less concerned (2.10 points lower) than women who were not pregnant ( $p = 0.012$ ).

Participants with chronic respiratory disease were significantly more concerned (next highest response) about access to healthcare support ( $p = 0.020$ ).

There were no statistically significant factors for the models with the following concerns: spreading COVID-19 to others; receiving appropriate care/support; and potentially receiving disparate healthcare support due to higher risk status. This suggests that high concern was similar across all high-risk groups.

### *Mitigating COVID-19*

More than 50% of participants in each high-risk group practiced social distancing with the exception of those with weakened immune systems ( $n=71$ ; 44.7%); see Supplementary Table 8. Twenty-one (60%) participants with chronic neurological diseases and 102 (57.3%) aged 70 years or older self-isolated. Twenty-eight (57.1%) participants with chronic liver disease, 18 with chronic neurological disease, and 96 (53.9%) aged 70 years or older used online shopping or food delivery. Eighty-five (53.5%) participants with weakened immune systems and 11 (68.8%) with spleen problems used shielding. Less than 50% of participants in each high-risk group wore protective apparel or took all of the actions specified in the survey.

Participants living with diabetes were more likely to practice social distancing (OR 2.44, CI (1.25, 4.90)), whereas participants with weakened immune systems were less likely to practice social distancing (OR 0.34, CI (0.16, 0.73)); see Supplementary Table 9. Participants living with diabetes were also more likely to wear protective apparel (OR 2.17, CI (1.13, 4.14)); while participants with people  $> 70$  years and chronic liver disease were more likely to shop online (OR 2.66, CI (1.24, 5.88) and OR 3.34, CI (1.42, 8.14), respectively). Participants with either CKD, weakened immune systems or spleen problems were more likely to practice shielding (OR 2.76, CI (1.21, 6.31); OR 3.33, CI (1.55, 7.22); and OR 5.33, CI (1.15, 28.78), respectively). Finally, participants with weakened immune systems were more likely to take all mitigating risk actions identified (OR 2.61, CI (1.01, 6.41)). There were no statistically significant differences between high-risk groups with regards to self-isolation.

### *Interactions with Others and Stigma*

Three hundred and seventy-seven (41.0%) participants indicated that people behaved differently toward them compared to prior to COVID-19 lockdown. When asked if during the COVID-19 lockdown they felt more stigmatised or discriminated against 119 (13.0%) reported they had compared to prior to COVID-19 lockdown. Of these participants, 65 (54.6%) were living with diabetes, 25 (21.0%) had a BMI of  $\geq 40$  kg/m<sup>2</sup>, 21 (17.6%) had chronic respiratory disease, 24 (20.2%) had a weakened immune system, and 44 (37%) had other chronic short- or long-term risk factors. In all other high-risk groups fewer than 20 participants said that they felt stigmatised or discriminated against.

Participants with chronic neurological diseases were less likely to report that people behaved differently towards them (OR 0.23, CI (0.06, 1.00)) There were no discernible differences between the high-risk groups with regards to feelings of stigma and discrimination compared to prior to COVID-19 lockdown.

## **Exploration and Prediction using Text-Derived Features**

### Clustering

The personality and sentiment features were used as input to a clustering algorithm ( $k$ -means) in order to separate survey participants into groups. As the  $k$ -means algorithm requires to specify the number of clusters, we first experimented with different values of  $k$  (between 2 and 10). We used two heuristics (sum of squared distance and an elbow plot, and degree of separation between clusters and a silhouette plot) to evaluate which  $k$  value resulted in most coherent and disparate clusters. According to both heuristics, two clusters resulted in the best differentiation: the first cluster with 335 participants and second with 301 participants (see Figure 1 for a visualisation of the clusters). Table 4 lists the ten most differentiating features and the cluster centroid values. The first cluster had a negative compound sentiment score and higher values for neuroticism, insecurity, 'Type A' personality (i.e., more competitive and ambitious), aggression, stress, and coldness, while the second cluster had a positive compound sentiment score and higher values for dutifulness, cooperation, and social skills. From here on in, the first cluster is referred to as the Negative Cluster, and the second cluster as the Positive Cluster.

**Figure 1.** Visualisation of clusters using Principal Component Analysis (PCA).

**Table 4.** Cluster centroids for the ten features with greatest absolute value differences between clusters. All scores are within  $[0, 1]$  range with the exception of compound sentiment score which uses  $[-1, 1]$  range.

| Feature                    | Negative Cluster | Positive Cluster |
|----------------------------|------------------|------------------|
| Sentiment (compound score) | -0.75            | 0.62             |
| Neurotic                   | 0.85             | 0.61             |
| Insecure                   | 0.73             | 0.50             |
| 'Type A'                   | 0.34             | 0.15             |
| Aggressive                 | 0.53             | 0.34             |
| Dutiful                    | 0.50             | 0.69             |
| Cooperative                | 0.58             | 0.75             |
| Stressed                   | 0.81             | 0.64             |
| Cold                       | 0.62             | 0.46             |
| Social skills              | 0.13             | 0.29             |

The study investigated whether the two clusters had differed in their responses (Table 5). There were no significant differences in how the two clusters took mitigating actions to avoid infection from COVID-19. However, participants in the Negative Cluster rated their concerns significantly higher than the Positive Cluster in five out of six cases; with the only concern showing no difference was about spreading COVID-19 to others. In terms of lifestyle behaviours, Negative Cluster reported greater impact on diet and sleep, and less physical activity than before COVID-19 lockdown. Negative Cluster also scored significantly worse for depression and psychological wellbeing. In terms of changes to healthcare support, Negative Cluster reported more often change to their appointments and using telephone appointments, while Positive Cluster reported no change to healthcare support, and lower satisfaction with platforms used to receive care and with the information and resources presented within them.

**Table 5.** Comparison between clusters of actions, concerns, lifestyle behaviours, depression and wellbeing scores, impact on health management, and use of platforms for health management. Numeric variables were compared using *t*-test, binary variables were compared using proportions *z*-test. Test results and *p*-values were rounded to two decimal places.

|                                       |                                             | Negative Cluster | Positive Cluster | Test result | <i>p</i> -value |
|---------------------------------------|---------------------------------------------|------------------|------------------|-------------|-----------------|
| <b>Actions</b>                        | Social distancing                           | 303              | 188              | 0.83        | 0.41            |
|                                       | Self-isolation                              | 202              | 104              | -1.72       | 0.09            |
|                                       | Wearing protective apparel                  | 127              | 81               | 0.55        | 0.58            |
|                                       | Online shopping                             | 187              | 117              | 0.53        | 0.60            |
|                                       | Shielding                                   | 109              | 64               | -0.14       | 0.89            |
|                                       | All above                                   | 51               | 26               | -0.71       | 0.48            |
| <b>Concerns</b>                       | Becoming infected                           | 7.72             | 7.05             | -3.29       | <0.01           |
|                                       | Severe illness or death                     | 7.88             | 7.25             | -2.82       | 0.01            |
|                                       | Spreading COVID-19 to others                | 7.12             | 6.76             | -1.44       | 0.15            |
|                                       | Access to healthcare                        | 6.06             | 4.97             | -4.28       | <0.01           |
|                                       | Appropriate care if infected                | 6.88             | 5.76             | -4.22       | <0.01           |
|                                       | Worse care compared to low-risk individuals | 6.02             | 5.05             | -3.23       | <0.01           |
| <b>Lifestyle</b>                      | Shopping                                    | 3.31             | 3.22             | -1.16       | 0.25            |
|                                       | Diet                                        | 1.75             | 1.41             | -3.72       | <0.01           |
|                                       | Alcohol consumption                         | 0.05             | 0.09             | 0.62        | 0.53            |
|                                       | Physical activity (amount)                  | -0.78            | -0.28            | 5.25        | <0.01           |
|                                       | Physical activity(type)                     | 0.75             | 0.78             | 0.8         | 0.43            |
|                                       | Sleep                                       | 1.93             | 1.37             | -5.15       | <0.01           |
|                                       | Smoking (indicated yes)                     | 0.05             | 0.01             | -2.81       | 0.01            |
|                                       | Smoking (impact)                            | 0.15             | 0                | -0.16       | 0.87            |
|                                       | E-cigarettes (indicated yes)                | 0.04             | 0.03             | -1.14       | 0.25            |
|                                       | E-cigarettes (impact)                       | 0.53             | 0.33             | -0.48       | 0.64            |
| <b>Depression</b>                     | PHQ-9 score                                 | 9.16             | 5.49             | -7.63       | <0.01           |
|                                       | <b>Wellbeing</b>                            | WEMWBS score     | 42.23            | 49.36       | 8.29            |
| <b>Change to healthcare support</b>   | General management                          | 398              | 237              | -1.29       | 0.2             |
|                                       | Appointments                                | 311              | 161              | -2.93       | <0.01           |
|                                       | Medication                                  | 146              | 75               | -1.33       | 0.19            |
|                                       | Elective surgery                            | 50               | 36               | 0.91        | 0.36            |
|                                       | Communications platform                     | 84               | 44               | -0.8        | 0.43            |
|                                       | Clinician                                   | 91               | 50               | -0.55       | 0.59            |
|                                       | Other                                       | 50               | 21               | -1.45       | 0.15            |
| <b>Platforms used to receive care</b> | No change                                   | 55               | 60               | 3.61        | <0.01           |
|                                       | Social media                                | 23               | 19               | 1.08        | 0.28            |
|                                       | Mobile phone app                            | 34               | 34               | 2.27        | 0.02            |
|                                       | Email                                       | 60               | 35               | -0.13       | 0.90            |
|                                       | Telephone                                   | 219              | 111              | -2.05       | 0.04            |
|                                       | Virtual consultation                        | 43               | 23               | -0.46       | 0.65            |
|                                       | Other                                       | 18               | 18               | 1.61        | 0.11            |
|                                       | No new platforms                            | 118              | 79               | 0.94        | 0.35            |
|                                       | Still face-to-face                          | 18               | 9                | -0.45       | 0.65            |

|                              |      |      |      |       |
|------------------------------|------|------|------|-------|
| Satisfied with platforms     | 0.39 | 0.7  | 3.32 | <0.01 |
| Satisfied with information   | 0.33 | 0.64 | 3.46 | <0.01 |
| Continue using in the future | 186  | 124  | 1.31 | 0.19  |

## Discussion

This study provides the essential evidence to start addressing the dearth of detailed information regarding the impact of COVID-19 on the 2.2 million people identified at higher risk of severe illness from COVID-19 and advised to shield during lockdown.

During the COVID-19 lockdown, the management of health conditions amongst people identified as at high risk of severe illness changed. Nearly half of the sample reported using telephone care, with people aged 70 years or over less likely to use telephone care. People living with diabetes and liver disease reported the greatest use of social media, while people living with chronic liver disease and neurological conditions were most likely to use virtual consultations. The majority of participants reported that they were satisfied with the new platforms and the information provided to manage their health conditions, and importantly would welcome continued use. Notably, people living in higher deprivation reported greater uncertainty about continued use which may identify concerns regarding internet poverty and inability to access digital care within this community. It is imperative that new technologies for supporting people living with health conditions are accessible for all, and does not disproportionately impact subgroups of the population and potentially widen health inequalities. Indeed, the higher prevalence of chronic health conditions amongst people living in more deprived communities, and the disproportionate impact of COVID-19 infection on people living in poorer communities, highlights the need to address these concerns or uncertainty, given the likelihood of continued short- and long-term use of new technologies to support patient care.

Emerging evidence has demonstrated that the COVID-19 lockdown and restrictions have impacted lifestyle behaviours such as decrease in physical activity and sleep deprivation, although this has predominantly focussed on the general population.<sup>13,14</sup> Current study findings provide novel evidence about the impact on people identified as at high risk of severe illness from COVID-19 infection, and thus, people who have needed to follow greater restrictions. Reductions in physical activity were also observed for people with chronic respiratory disease, CKD and weakened immune system, which would be consistent with those who may have avoided venturing outside due to risk of COVID-19 infection. Across all groups, people reported that their sleep quality and amount was impacted.

As the pandemic has progressed, a greater emphasis has been placed on the impact that lockdown, restrictions on daily life including meeting with significant others, the loss of loved ones, the loss of work and others have had on mental health. This study demonstrates that for the majority of the sample, the pandemic has led to worse mental health, with only 6% reporting an improvement. This was greater than the 35% of vulnerable people reporting worse mental health from the Office of National Statistics.<sup>2</sup> This may have been due to population differences but overall represents a consistent message that lockdown had a negative impact on people's self-reported mental health. In alignment, mean wellbeing was lower than the national average,<sup>15</sup> and depression was higher than that found in a general population sample from the COVID-19 Social Study.<sup>16</sup> The statistical analysis demonstrates that young women who are at risk of severe illness from COVID-19 report that their mental health has been most negatively impacted, have lower wellbeing and higher depression. This is consistent with other data showing that depression was higher in young people,<sup>16</sup> suggesting that the lockdown restrictions has more negatively impacted younger people and requires greater consideration. Moreover, people with a higher BMI or with multiple risk factors reported the highest depression, which may well be expected given the link between obesity and depression.<sup>17</sup> Given that this study highlights the impact of the COVID-19 pandemic on the mental health of people identified as at high risk of severe illness, policymakers, community groups, and health charities should consider how and in what ways they can best support or refer people whose mental health may have been compromised – which for many may go above and beyond their usual activities. This may involve policymakers considering how and in what ways to support in particular health charities to provide this care given economic challenges facing many during the pandemic and the reduction in access to clinical services.

1  
2  
3 Artificial Intelligence methods were applied to the data to consider how intrinsic factors, specifically  
4 personality and sentiment, derived from language samples could provide additional insights into  
5 people's actions and attitudes relating to COVID-19. Based on those intrinsic factors, the participants  
6 clustered into two groups. Crucially, the two groups differed significantly in their responses. Compared  
7 to the Positive Cluster (with higher dutifulness and cooperation scores and positive sentiment), the  
8 Negative Cluster had higher neuroticism, insecurity score and negative sentiment and reported higher  
9 levels of concern, greater negative impact on lifestyle behaviours, higher depression and lower  
10 wellbeing, alongside lower satisfaction with platforms used to deliver their healthcare during COVID-  
11 19. Furthermore, when predicting actions or attitudes for individuals, word vectors (features derived  
12 from language samples) achieved fairly good to good prediction performance (between 0.7 and 0.8  
13 AUROC). On the other hand, personality and sentiment features were better predictors of depression  
14 and wellbeing than word vectors. Overall, current study data suggests that analysing language samples  
15 using Artificial Intelligence could yield useful insights into people's attitudes and actions relating to  
16 COVID-19 and effectively identify individuals at higher risk. Future work can explore the feasibility of  
17 using these methods as a preventative support measure, by using them within a digital environment to  
18 identify whether someone is likely to be more significantly impacted and offer them appropriate  
19 support.

20  
21 This study is not without limitations. First, it provides a cross-sectional analysis, and as such informs  
22 about the COVID-19 lockdown period. Nevertheless, this study provides much needed insights about a  
23 subsection of the population who have been subject to greater restrictions and as the findings  
24 demonstrate, have been impacted in terms of access to healthcare, lifestyle behaviours, and mental  
25 health. Second, due to the recruitment methods, the sample was not totally representative, has used a  
26 self-recruitment methods which may have led to a more motivated sample and would not have recruited  
27 people experiencing digital poverty. Finally, given the reported increased risk for people from black  
28 and minority ethnic (BAME) backgrounds, the low recruitment of people from BAME backgrounds  
29 means that comparison of the impact on people of different ethnic backgrounds was not possible.

30  
31 Further research to assess the longer term impact of COVID-19 on people identified at high risk is  
32 needed. This research should provide insights into the longer term changes to healthcare access,  
33 provision and support, and where relevant, how technological platforms have facilitated continued care.  
34 This study demonstrated the adults identified as at high risk of severe illness from COVID-19 reported  
35 lower wellbeing, that their mental health had worsened and varied levels of depression. Given the  
36 continued restrictions for many people within this population subgroup, and thus the associated impact  
37 on other areas of life including employment, future research should assess the longer term impact on  
38 mental health. Indeed, it might be argued that people with mental health concerns may also be at high  
39 risk from the impact of COVID-19 and as such, appropriate measures and support made available.  
40 Finally, research is also needed to understand the impact of delayed healthcare support such as elective  
41 surgery.

## 42 43 44 45 **Conclusions**

46 This study provides novel insights into the awareness, attitudes and actions of UK adults identified as  
47 at high risk of severe illness from COVID-19. In particular, this study demonstrates that the pandemic  
48 has impacted people's access to healthcare support, lifestyle behaviours and mental health.  
49 Furthermore, the use of an innovative Artificial Intelligence tool has demonstrated the advanced insights  
50 that can be gleaned from patient language samples to predict behaviours and health outcomes in  
51 response to the COVID-19 pandemic. This has the potential to enable clinicians to identify people at  
52 greater risk and highlights the value of using Artificial Intelligence within healthcare, particularly  
53 during the COVID-19 pandemic.

54  
55 As such, there are important implications for policy makers, healthcare and clinical practice as well as  
56 healthcare technology companies. Working with adults identified as at high risk of severe illness from  
57 COVID-19, action is needed that aims to address issues relating to access to healthcare, attitudes  
58 towards use of technological platforms and to support people's mental health. The findings demonstrate  
59 that healthcare access and support has been significantly impacted, that their lifestyle related behaviours  
60



1  
2  
3 have changed and that mental health has worsened. It is paramount to not only understand but take  
4 actions to reduce any potential unintended consequences of the restrictions placed on daily life, which  
5 may avoid exacerbating physical and mental health concerns.  
6  
7

### 8 **Contributorship Statement**

9 SWF conceived the study. SWF, AB and AT contributed to the study design and methodology. SWF  
10 was responsible for the oversight of the study. SWF, AB & AT contributed to the recruitment of  
11 participants. AP & ACJ were responsible for data analysis. All authors contributed to data  
12 interpretation, and the writing of the manuscript. All authors contributed to critical revision of the  
13 manuscript for important intellectual content and gave final approval.  
14

### 15 **Competing Interest**

16 SWF & AP are employed by Scaled Insights.  
17  
18

### 19 **Funding**

20 This study was partly supported by an investigator-initiated grant from Ethicon, Johnson & Johnson  
21 Medical Ltd (Grant Number: 20200401); the funder had no role in study design, data analysis, data  
22 interpretation, or writing of the report.  
23  
24

### 25 **Data sharing statement**

26 De-identified participant data that underlie the results reported in this manuscript will be made available  
27 on publication and ending 5 years after publication. Proposals should be made to the corresponding  
28 author and will require a data access agreement.  
29

### 30 **Ethical Approval**

31 The study was granted ethical approval by the School of Psychology Research Ethics Committee at  
32 University of Leeds (REC number PSYC-28).  
33  
34

### 35 **References**

- 36 1. World Health Organization. 2020. WHO Director-General's opening remarks at the media  
37 briefing on COVID-19 - 11 March 2020. [https://www.who.int/dg/speeches/detail/who-](https://www.who.int/dg/speeches/detail/who-director-general-s-opening-remarks-at-the-media-briefing-on-covid-19---11-march-2020)  
38 [director-general-s-opening-remarks-at-the-media-briefing-on-covid-19---11-march-2020](https://www.who.int/dg/speeches/detail/who-director-general-s-opening-remarks-at-the-media-briefing-on-covid-19---11-march-2020) [Last  
39 accessed August 25 2020].
- 40 2. Office of National Statistics. Coronavirus and shielding of clinically extremely vulnerable  
41 people in England: 29 May to 3 June 2020. 2020.  
42 [https://www.ons.gov.uk/peoplepopulationandcommunity/healthandsocialcare/conditionsanddiseases/bulletins/coronavirusandshieldingofclinicallyextremelyvulnerablepeopleinengland/28m-](https://www.ons.gov.uk/peoplepopulationandcommunity/healthandsocialcare/conditionsanddiseases/bulletins/coronavirusandshieldingofclinicallyextremelyvulnerablepeopleinengland/28mayto3june2020)  
43 [ayto3june2020](https://www.ons.gov.uk/peoplepopulationandcommunity/healthandsocialcare/conditionsanddiseases/bulletins/coronavirusandshieldingofclinicallyextremelyvulnerablepeopleinengland/28mayto3june2020) [Last accessed 06 September 2020].
- 44 3. Luchetti M, Lee JH, Aschwanden D, Sesker A, Strickhouser JE, Terracciano A, Sutin AR. The  
45 trajectory of loneliness in response to COVID-19. *American Psychologist*. 2020 Jun 22.
- 46 4. Tull MT, Edmonds KA, Scamaldo K, Richmond JR, Rose JP, Gratz KL. Psychological  
47 Outcomes Associated with Stay-at-Home Orders and the Perceived Impact of COVID-19 on  
48 Daily Life. *Psychiatry research*. 2020 May 12:113098.
- 49 5. Wolf MS, Serper M, Opsasnick L, O'Connor RM, Curtis LM, Benavente JY, Wismer G, Batio  
50 S, Eifler M, Zheng P, Russell A. Awareness, attitudes, and actions related to COVID-19 among  
51 adults with chronic conditions at the onset of the US outbreak: a cross-sectional survey. *Annals*  
52 *of internal medicine*. 2020 Apr 9.
- 53 6. Public Health England. Guidance on social distancing for everyone in the UK. 2020.  
54 <https://www.gov.uk/government/publications/covid-19-guidance-on-social-distancing-and->  
55  
56  
57  
58  
59  
60

for-vulnerable-people/guidance-on-social-distancing-for-everyone-in-the-uk-and-protecting-older-people-and-vulnerable-adults [Last accessed August 26 2020].

7. Tennant R, Hiller L, Fishwick R, Platt S, Joseph S, Weich S, Parkinson J, Secker J, Stewart-Brown S. The Warwick-Edinburgh mental well-being scale (WEMWBS): development and UK validation. *Health and Quality of life Outcomes*. 2007 Dec;5(1):63.
8. Kroenke K, Spitzer RL. The PHQ-9: a new depression diagnostic and severity measure. *Psychiatric annals*. 2002 Sep 1;32(9):509-15.
9. Wickham H, Averick M, Bryan J, Chang W, McGowan LD, François R, Grolemond G, Hayes A, Henry L, Hester J, Kuhn M. Welcome to the Tidyverse. *Journal of Open Source Software*. 2019 Nov 21;4(43):1686.
10. Yee TW. Complements to Vector Generalized Linear and Additive Models. R package version 1.1-3.
11. R: A language and environment for statistical computing. R Foundation for Statistical Computing, Vienna, Austria. 2019. URL <https://www.R-project.org/>
12. Gilbert CH, Hutto E. Vader: A parsimonious rule-based model for sentiment analysis of social media text. In Eighth International Conference on Weblogs and Social Media (ICWSM-14). Available at (20/04/16) <http://comp.social.gatech.edu/papers/icwsm14.vader.hutto.pdf> 2014 Jun (Vol. 81, p. 82).
13. Hamer M, Kivimäki M, Gale CR, Batty GD. Lifestyle risk factors, inflammatory mechanisms, and COVID-19 hospitalization: A community-based cohort study of 387,109 adults in UK. *Brain, Behavior, and Immunity*. 2020 May 23.
14. Obesity Action Scotland (2020) Lifestyle of Scotland's People Since the Coronavirus Outbreak <https://www.obesityactionscotland.org/publications/reports/lifestyle-of-scotland-s-people-since-the-coronavirus-outbreak-polling-results/> [Last Accessed 13 September 2020]
15. NHS Digital (2017) Health Survey for England 2016: Well-being and mental health (Version 2, Published 27<sup>th</sup> November 2019) <https://digital.nhs.uk/data-and-information/publications/statistical/health-survey-for-england/health-survey-for-england-2016> [Last Accessed 13 September 2020]
16. Fancourt, D., Bu, Feifei, Wan Mak, H. Steptoe A. (2020) COVID-19 Social Study, Results, 2020. <https://www.covidsocialstudy.org/results> [Last accessed 13 September, 2020].
17. Luppino FS, de Wit LM, Bouvy PF, Stijnen T, Cuijpers P, Penninx BW, Zitman FG. Overweight, obesity, and depression: a systematic review and meta-analysis of longitudinal studies. *Archives of general psychiatry*. 2010 Mar 1;67(3):220-9.

### Acknowledgements

We would like to acknowledge and thank the following organisations for disseminating the survey.

APPG Obesity  
 APPG Medical Research  
 Anticoagulation UK  
 Association for Medical Research Charities  
 Asthma UK  
 Blackpool, Fylde & Wyre haemochromatosis Support Group  
 British Dietetics Association  
 British Liver Trust  
 British Lung Foundation  
 Diabetes UK  
 Elton John AIDS Foundation

1  
2  
3 European Association for the Study of Obesity  
4 Hepatitis C Trust  
5 Kidney Care UK  
6 JDRF  
7 Leeds Academic Health Partnership  
8 LIVErNORTH  
9 Melanoma UK  
10 MS Society  
11 Nexus Leeds  
12 Norfolk & Norwich Liver Group  
13 Obesity UK  
14 Parkinson's Society  
15 PBC Foundation  
16 Public Health Scotland  
17 Research for the Future  
18 Salford Sickle Cell Society  
19 Terrance Higgins Trust  
20 The Somerville Foundation  
21 Yorkshire Cancer Community  
22  
23  
24  
25  
26  
27  
28  
29  
30  
31  
32  
33  
34  
35  
36  
37  
38  
39  
40  
41  
42  
43  
44  
45  
46  
47  
48  
49  
50  
51  
52  
53  
54  
55  
56  
57  
58  
59  
60

### BMJ Open

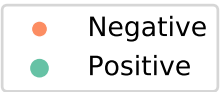

1  
2  
3  
4  
5  
6  
7  
8  
9  
10  
11  
12  
13  
14  
15  
16  
17  
18  
19  
20  
21  
22  
23  
24  
25  
26

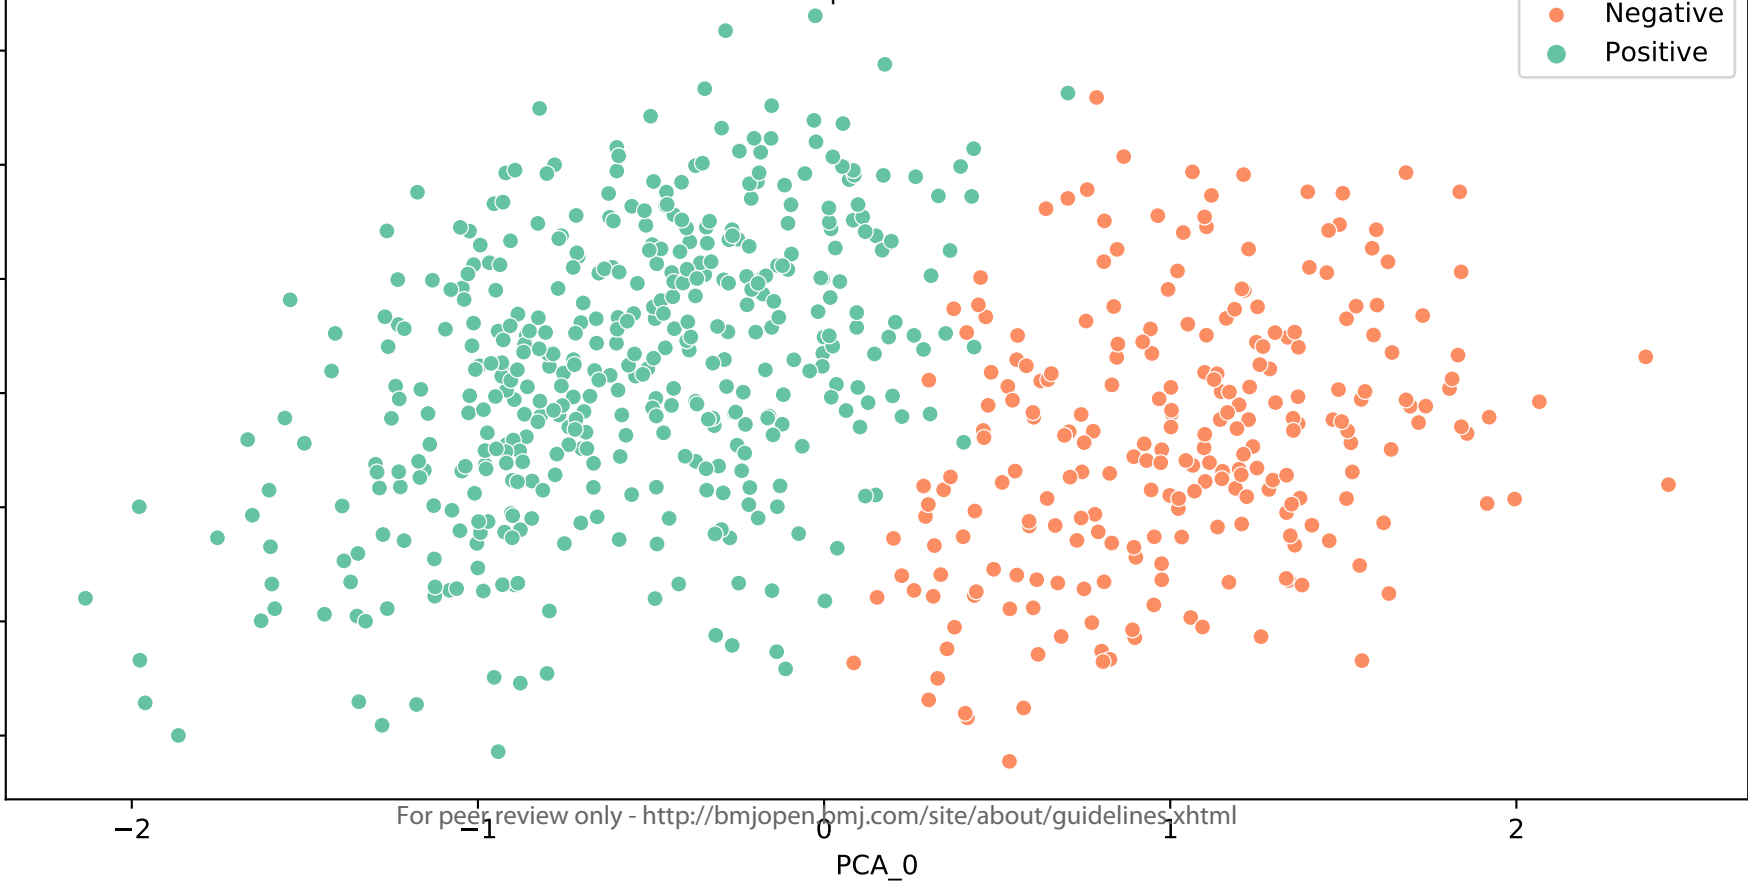

**Supplementary materials**

1. Awareness, Attitudes and Actions (AAA) survey
2. Supplementary data analysis
3. Statistics tables and figures
4. AI prediction models

For peer review only

## Awareness, Attitudes and Actions (AAA) survey

| Survey questions                                                | Response categories/instruction                                                                                                                                                                                                                                                                                                                                                                                                                                                                                                                                                                                                                                                                                                                                                                                                                                       |
|-----------------------------------------------------------------|-----------------------------------------------------------------------------------------------------------------------------------------------------------------------------------------------------------------------------------------------------------------------------------------------------------------------------------------------------------------------------------------------------------------------------------------------------------------------------------------------------------------------------------------------------------------------------------------------------------------------------------------------------------------------------------------------------------------------------------------------------------------------------------------------------------------------------------------------------------------------|
| <b>Section A: demographics</b>                                  |                                                                                                                                                                                                                                                                                                                                                                                                                                                                                                                                                                                                                                                                                                                                                                                                                                                                       |
| Does any of the following apply to you? (select all that apply) | Diabetes (Type 1 or 2)<br>A body mass index (BMI) of 40 or above<br>Chronic (long-term) respiratory diseases, such as asthma, chronic obstructive pulmonary disease (COPD), emphysema or bronchitis<br>Chronic heart disease, such as heart failure<br>Chronic kidney disease<br>Chronic liver disease, such as hepatitis<br>Chronic neurological conditions, such as Parkinson's disease, motor neurone disease, multiple sclerosis (MS), a learning disability or cerebral palsy<br>Problems with your spleen – for example, sickle cell disease or if you have had your spleen removed<br>A weakened immune system as the result of conditions such as HIV and AIDS, or medicines such as steroid tablets or chemotherapy<br>None of these apply to me<br>I have a different long term health condition not listed above (please specify in the text box provided) |
| Please state your age                                           | Textbox                                                                                                                                                                                                                                                                                                                                                                                                                                                                                                                                                                                                                                                                                                                                                                                                                                                               |
| Gender                                                          | Male<br>Female<br>Other (textbox)<br>Prefer not to say                                                                                                                                                                                                                                                                                                                                                                                                                                                                                                                                                                                                                                                                                                                                                                                                                |
| What is your ethnicity?                                         | White – British, Irish, other<br>Asian/Asian British – Indian, Pakistani, Bangladeshi, other<br>Chinese/Chinese British<br>Black/Black British – Caribbean, African, other<br>Middle Eastern/Middle Eastern British – Arab, Turkish, other<br>Mixed race – White and Black/Black British<br>Mixed race – other<br>Other ethnic groups (please specify in the text box provided)<br>Prefer not to say                                                                                                                                                                                                                                                                                                                                                                                                                                                                  |
| What is your height in feet and inches, or centimetres?         | Text box provided for each                                                                                                                                                                                                                                                                                                                                                                                                                                                                                                                                                                                                                                                                                                                                                                                                                                            |
| What is your weight in pounds or kilograms?                     | Text box provided for each                                                                                                                                                                                                                                                                                                                                                                                                                                                                                                                                                                                                                                                                                                                                                                                                                                            |

|                                                                         |                                                                                                                                 |                                                                                                                                                                                                                                                                   |
|-------------------------------------------------------------------------|---------------------------------------------------------------------------------------------------------------------------------|-------------------------------------------------------------------------------------------------------------------------------------------------------------------------------------------------------------------------------------------------------------------|
| 1<br>2<br>3<br>4<br>5<br>6                                              | Do you work in health or social care?                                                                                           | Yes (please provide your job title in the text box)<br>No                                                                                                                                                                                                         |
| 7<br>8<br>9                                                             | Does your job require you to be in direct contact with coronavirus (COVID-19) patients?                                         | Yes<br>No                                                                                                                                                                                                                                                         |
| 10<br>11                                                                | Please provide the first half of your postcode (e.g. NG1)                                                                       | Textbox provided                                                                                                                                                                                                                                                  |
| 12                                                                      | Please provide your email address                                                                                               | Textbox provided                                                                                                                                                                                                                                                  |
| <b>Section B: awareness, attitudes and actions relating to COVID-19</b> |                                                                                                                                 |                                                                                                                                                                                                                                                                   |
| 13<br>14<br>15<br>16<br>17                                              | Have you had coronavirus?                                                                                                       | Yes – I have been diagnosed and am still ill<br>Yes – I have and I have recovered<br>Yes - I have been diagnosed, but had no symptoms<br>No                                                                                                                       |
| 18<br>19<br>20<br>21<br>22                                              | Have you experienced coronavirus symptoms?                                                                                      | Yes - and I was diagnosed<br>Yes – but I have not been diagnosed<br>No<br>I don't know what the symptoms                                                                                                                                                          |
| 23<br>24<br>25<br>26<br>27<br>28<br>29<br>30<br>31<br>32<br>33<br>34    | Which of the below are symptoms of coronavirus? (Select all that is relevant)                                                   | Persistent cough<br>Feeling confused<br>Loss of appetite<br>Loss of smell<br>Loss of taste<br>Tightness in chest<br>Diarrhoea<br>Fatigue<br>Shortness of breath<br>Fever<br>Sore throat<br>None of the above                                                      |
| 35<br>36<br>37<br>38<br>39<br>40<br>41<br>42<br>43<br>44<br>45          | Have you taken any of the actions below in response to the coronavirus (COVID-19) outbreak? (select all that apply)             | Social distancing<br>Self-isolation<br>Worn protective apparel (e.g. gloves, mask etc.)<br>Used online shopping or food delivery service<br>Shielding due as my health status means I am defined as 'extremely vulnerable'<br>All of the above<br>Other (Textbox) |
| 46<br>47                                                                | Do you believe you are at higher risk of severe illness from coronavirus (COVID-19)?                                            | Yes<br>No                                                                                                                                                                                                                                                         |
| 48<br>49<br>50                                                          | Why do you believe you are at a higher risk of severe illness from coronavirus (COVID-19)? (only for those who answered yes)    | Textbox                                                                                                                                                                                                                                                           |
| 51<br>52<br>53<br>54                                                    | Why do you believe you are not at a higher risk of severe illness from coronavirus (COVID-19)? (only for those who answered no) | Textbox                                                                                                                                                                                                                                                           |

|                                                                                              |                                                                                                                                                                                                                                                                                                                                                                                                                                                                                                                                                                              |                                                                                                                                                                                                                                                                                                                     |
|----------------------------------------------------------------------------------------------|------------------------------------------------------------------------------------------------------------------------------------------------------------------------------------------------------------------------------------------------------------------------------------------------------------------------------------------------------------------------------------------------------------------------------------------------------------------------------------------------------------------------------------------------------------------------------|---------------------------------------------------------------------------------------------------------------------------------------------------------------------------------------------------------------------------------------------------------------------------------------------------------------------|
| 1<br>2<br>3<br>4<br>5<br>6                                                                   | Describe how being identified as being at a higher risk of severe illness from coronavirus (COVID-19) by the UK Government, has made you feel?                                                                                                                                                                                                                                                                                                                                                                                                                               | Textbox                                                                                                                                                                                                                                                                                                             |
| 7<br>8<br>9<br>10<br>11<br>12<br>13<br>14<br>15<br>16<br>17<br>18<br>19                      | What sources have informed you that you are at a higher risk from coronavirus (COVID-19)? (select all that apply)                                                                                                                                                                                                                                                                                                                                                                                                                                                            | Traditional media (TV, Newspapers, Radio)<br>Social media (Twitter, Facebook, Instagram, Snapchat)<br>National or Local Government<br>Employer<br>Healthcare organisations<br>Community groups<br>Charity<br>Friends and Family<br>Schools and education centres<br>Other (please specify in the text box provided) |
| 20<br>21<br>22                                                                               | Do you feel like you have enough information specific to your higher risk of severe illness from coronavirus (COVID-19)?                                                                                                                                                                                                                                                                                                                                                                                                                                                     | Yes<br>No                                                                                                                                                                                                                                                                                                           |
| 23<br>24<br>25<br>26<br>27<br>28                                                             | Why do you believe you have received enough information specific to your higher risk of severe illness from coronavirus (COVID-19), and what more do you want to know? (only for those who answered yes)                                                                                                                                                                                                                                                                                                                                                                     | Textbox                                                                                                                                                                                                                                                                                                             |
| 29<br>30<br>31<br>32<br>33                                                                   | Why do you believe you have not received enough information specific to your higher risk of severe illness from coronavirus (COVID-19), and what else do you want to know? (only for those who answered no)                                                                                                                                                                                                                                                                                                                                                                  | Textbox                                                                                                                                                                                                                                                                                                             |
| 34<br>35<br>36                                                                               | Have you used other forms of information (i.e. nonprofessional/social media “experts”/other people/patients) since the COVID-19 outbreak?                                                                                                                                                                                                                                                                                                                                                                                                                                    | Yes<br>No                                                                                                                                                                                                                                                                                                           |
| 37<br>38<br>39                                                                               | Please specify what information you have used relating to your higher risk status since the coronavirus (COVID19) outbreak                                                                                                                                                                                                                                                                                                                                                                                                                                                   | Textbox                                                                                                                                                                                                                                                                                                             |
| 40<br>41<br>42<br>43<br>44<br>45<br>46<br>47<br>48<br>49<br>50<br>51<br>52<br>53<br>54<br>55 | How concerned are you about each of the statements below <ul style="list-style-type: none"> <li>• Becoming infected with coronavirus (COVID-19)</li> <li>• Severe illness and possibly death from coronavirus (COVID-19)</li> <li>• Spreading coronavirus (COVID-19) to others including family and friends</li> <li>• Access to healthcare support (e.g. advice, medication)</li> <li>• If you become infected, that you would receive appropriate care/support</li> <li>• That your higher risk of severe illness from coronavirus (COVID-19) means you may not</li> </ul> | Likert scale from 0 (Not concerned at all) to 10 (Very concerned)                                                                                                                                                                                                                                                   |



|                                                                                                                                                                   |                                                                                                                                                                                                                                                                                                                                                |
|-------------------------------------------------------------------------------------------------------------------------------------------------------------------|------------------------------------------------------------------------------------------------------------------------------------------------------------------------------------------------------------------------------------------------------------------------------------------------------------------------------------------------|
| receive healthcare support compared with people who do not have a higher risk status                                                                              |                                                                                                                                                                                                                                                                                                                                                |
| <b><i>Section C: impact of COVID-19 on management of health conditions and use of technology</i></b>                                                              |                                                                                                                                                                                                                                                                                                                                                |
| Has your management of your health condition changed compared to before the coronavirus (COVID-19) outbreak?                                                      | Yes<br>No<br>Not applicable (70 years or over or pregnant without a health condition)                                                                                                                                                                                                                                                          |
| How and why has it changed?                                                                                                                                       | Textbox                                                                                                                                                                                                                                                                                                                                        |
| How do you feel about changing your management of your health condition due to the coronavirus (COVID-19) outbreak?                                               | Textbox                                                                                                                                                                                                                                                                                                                                        |
| Has COVID-19 changed your regular healthcare support? (this could type or frequency of support e.g. appointments, service, medications, communication consultant) | Appointments (please specify in the text box)<br>Medication (please specify in the text box)<br>Elective surgery (please specify in the text box)<br>Communication platform (please specify in the text box)<br>Clinician caring for me (please specify in the text box)<br>Other (please specify in the text box)<br>There has been no change |
| Have you received care through any of the following platforms?                                                                                                    | Social media (please specify in the text box)<br>Mobile phone app (please specify in the text box)<br>Email<br>Telephone Virtual consultation e.g. Zoom, Microsoft Teams (please specify in the text box)<br>Other (please specify in the text box)<br>No platforms have been used<br>I am still receiving face to face care                   |
| How satisfied are you with using the platforms that you are receiving care through?                                                                               | Extremely dissatisfied<br>Somewhat dissatisfied<br>Neither satisfied nor dissatisfied<br>Somewhat satisfied<br>Extremely satisfied                                                                                                                                                                                                             |
| How satisfied are you with using the information/resources provided through the platforms that you are receiving care through?                                    | Extremely dissatisfied<br>Somewhat dissatisfied<br>Neither satisfied nor dissatisfied<br>Somewhat satisfied<br>Extremely satisfied                                                                                                                                                                                                             |
| Would you welcome the continued use of these platforms in the future, after the coronavirus (COVID-19) outbreak?                                                  | Yes<br>No, but would welcome other platforms (please specify in the text box)<br>No<br>Not sure, I need more time to use them                                                                                                                                                                                                                  |

|                                                                                                                                                                                                                                                                                                                                                                                                                                                                                                                                                                                                                                                                                                                                                                                                                                                                                                                                                             |                                                                                              |
|-------------------------------------------------------------------------------------------------------------------------------------------------------------------------------------------------------------------------------------------------------------------------------------------------------------------------------------------------------------------------------------------------------------------------------------------------------------------------------------------------------------------------------------------------------------------------------------------------------------------------------------------------------------------------------------------------------------------------------------------------------------------------------------------------------------------------------------------------------------------------------------------------------------------------------------------------------------|----------------------------------------------------------------------------------------------|
| You indicated that you have more than one of the high risk indicator for severe illness from coronavirus (COVID19). Please describe how this makes you feel, and why?                                                                                                                                                                                                                                                                                                                                                                                                                                                                                                                                                                                                                                                                                                                                                                                       | Textbox                                                                                      |
| <b>Section D: Mental Health and Wellbeing</b>                                                                                                                                                                                                                                                                                                                                                                                                                                                                                                                                                                                                                                                                                                                                                                                                                                                                                                               |                                                                                              |
| Since the coronavirus (COVID-19) outbreak, my mental health is                                                                                                                                                                                                                                                                                                                                                                                                                                                                                                                                                                                                                                                                                                                                                                                                                                                                                              | Yes<br>No                                                                                    |
| <p>Warwick-Edinburgh Mental Well-being Scale (WEMWBS)</p> <p>During the past two weeks...</p> <ul style="list-style-type: none"> <li>• I've been feeling optimistic about the future</li> <li>• I've been feeling useful</li> <li>• I've been feeling relaxed</li> <li>• I've been feeling interested in other people</li> <li>• I've had energy to spare</li> <li>• I've been dealing with problems well</li> <li>• I've been thinking clearly</li> <li>• I've been feeling good about myself</li> <li>• I've been feeling close to other people</li> <li>• I've been feeling confident</li> <li>• I've been able to make up my own mind about things</li> <li>• I've been feeling loved</li> <li>• I've been interested in new things</li> <li>• I've been feeling cheerful</li> </ul>                                                                                                                                                                    | <p>Not at all</p> <p>Rarely</p> <p>Some of the time</p> <p>Often</p> <p>All of the time</p>  |
| <p>Patient Health Questionnaire (PHQ-9)</p> <p>Over the last two weeks, how often have you been bothered by any of the following problems</p> <ul style="list-style-type: none"> <li>• Little interest or pleasure in doing things?</li> <li>• Feeling down, depressed, or hopeless?</li> <li>• Trouble falling or staying asleep, or sleeping too much?</li> <li>• Feeling tired or having little energy?</li> <li>• Poor appetite or overeating?</li> <li>• Feeling bad about yourself - or that you are a failure or have let yourself or your family down?</li> <li>• Trouble concentrating on things, such as reading the newspaper or watching television?</li> <li>• Moving or speaking so slowly that other people could have noticed? Or the opposite - being so fidgety or restless that you have been moving around a lot more than usual?</li> <li>• Thoughts that you would be better off dead, or of hurting yourself in some way?</li> </ul> | <p>Not at all</p> <p>Several days</p> <p>More than half the days</p> <p>Nearly every day</p> |
| <b>Section D: lifestyle related behaviours</b>                                                                                                                                                                                                                                                                                                                                                                                                                                                                                                                                                                                                                                                                                                                                                                                                                                                                                                              |                                                                                              |

|                                        |                                                                                                     |                                                                                                                                                                                                         |
|----------------------------------------|-----------------------------------------------------------------------------------------------------|---------------------------------------------------------------------------------------------------------------------------------------------------------------------------------------------------------|
| 1<br>2<br>3<br>4<br>5<br>6<br>7        | Has your shopping changed since the coronavirus (COVID-19) outbreak?                                | A great deal<br>A lot<br>A moderate amount<br>A little<br>Not at all                                                                                                                                    |
| 8<br>9                                 | Describe how your shopping has changed since the coronavirus (COVID-19) outbreak                    | Textbox                                                                                                                                                                                                 |
| 10<br>11<br>12<br>13<br>14<br>15       | Has your diet changed since the coronavirus (COVID19) outbreak?                                     | A great deal<br>A lot<br>A moderate amount<br>A little<br>Not at all                                                                                                                                    |
| 16<br>17                               | Describe how your diet has changed since the coronavirus (COVID-19) outbreak                        | Textbox                                                                                                                                                                                                 |
| 18<br>19<br>20<br>21<br>22<br>23<br>24 | Has your alcohol consumption changed since the coronavirus outbreak?                                | I have consumed much less alcohol than usual<br>I have consumed less alcohol than usual<br>It hasn't changed<br>I have consumed more alcohol than usual<br>I have consumed much more alcohol than usual |
| 25<br>26<br>27                         | Why has your alcohol consumption changed since the coronavirus (COVID-19) outbreak?                 | Textbox                                                                                                                                                                                                 |
| 28<br>29<br>30<br>31<br>32             | Has the amount of physical activity you usually engage in changed since the coronavirus outbreak?   | I am much less active<br>I am less active<br>It hasn't changed<br>I am more active<br>I am much more active                                                                                             |
| 33<br>34                               | Has the type of physical activity you usually engage in changed since the coronavirus outbreak?     | Yes<br>No                                                                                                                                                                                               |
| 35<br>36<br>37                         | Describe how and why your physical activity has changed since the coronavirus outbreak              | Textbox                                                                                                                                                                                                 |
| 38<br>39<br>40<br>41<br>42             | Has the amount or quality of your sleep changed since the coronavirus outbreak?                     | A great deal<br>A lot<br>A moderate amount<br>A little<br>Not at all                                                                                                                                    |
| 43<br>44                               | Describe how and why the amount or quality of your sleep has changed since the coronavirus outbreak | Textbox                                                                                                                                                                                                 |
| 45<br>46                               | Do you smoke tobacco?                                                                               | Yes<br>No                                                                                                                                                                                               |
| 47<br>48<br>49<br>50<br>51             | Has the amount of tobacco you smoke changed compared to before the coronavirus (COVID-19) outbreak? | Much more<br>Somewhat more<br>About the same<br>Somewhat less<br>Much less                                                                                                                              |
| 52<br>53<br>54                         | Do you use e-cigarettes?                                                                            | Yes<br>No                                                                                                                                                                                               |

|                                  |                                                                                                                                                                                                                        |                                                                            |
|----------------------------------|------------------------------------------------------------------------------------------------------------------------------------------------------------------------------------------------------------------------|----------------------------------------------------------------------------|
| 1<br>2<br>3<br>4<br>5<br>6<br>7  | Has the amount of e-cigarettes you use changed compared to before the coronavirus (COVID19) outbreak?                                                                                                                  | Much more<br>Somewhat more<br>About the same<br>Somewhat less<br>Much less |
| 8<br>9                           | Other than alcohol or tobacco, do you use any recreational drugs?                                                                                                                                                      | Yes<br>No                                                                  |
| 10<br>11<br>12<br>13<br>14<br>15 | Has the amount of recreational drugs you use changed compared to before the coronavirus (COVID19) outbreak?                                                                                                            | Much more<br>Somewhat more<br>About the same<br>Somewhat less<br>Much less |
| 16                               | <b>Section E: Interaction with others</b>                                                                                                                                                                              |                                                                            |
| 17<br>18<br>19                   | For the following questions, please respond with your health condition or higher risk status (70 years old or over or pregnant regardless of medical conditions) in mind. Since the coronavirus (COVID-19) outbreak... |                                                                            |
| 20<br>21                         | Other people have behaved differently towards you?                                                                                                                                                                     | Yes<br>No                                                                  |
| 22<br>23<br>24<br>25             | Describe how and why people have behaved differently towards you since the COVID-19 outbreak?                                                                                                                          | Textbox                                                                    |
| 26<br>27                         | You felt stigmatised or discriminated against?                                                                                                                                                                         | Yes<br>No                                                                  |
| 28<br>29<br>30                   | Describe the stigmatising and/or discriminatory experience(s) you have had since the COVID-19 outbreak, and how this has made you feel?                                                                                | Textbox                                                                    |
| 31                               | <b>Final section</b>                                                                                                                                                                                                   |                                                                            |
| 32<br>33<br>34<br>35             | Is there anything that you haven't had chance to say about the coronavirus outbreak that you would like to share?                                                                                                      | Textbox                                                                    |

## Supplementary Data analysis

### *Text Data*

Text data was collected across 17 open-ended questions which were distributed throughout the survey sections. All responses to open-ended questions were concatenated, yielding a language sample for each survey participant, which was then tokenised using spaCy's large English web model<sup>1</sup>. The length of the concatenated responses (i.e. the number of tokens, including words, digits, and punctuation) varied from 1 to 2125 tokens (mean=184, median=135). The language sample for each participant was further processed to derive sentiment scores and personality scores. VADER Sentiment Analysis tool (Hutto & Gilbert, 2014) was used to obtain sentiment scores (positive, neutral, negative, and compound sentiment). Personality scores were obtained using proprietary software by Scaled Insights. The software takes as input a language sample and produces 114 personality features. Following this, the 118 features (114 personality, 4 sentiment) were used as input into the multiple machine learning models described below. As the reliability of the personality modelling software depends on the number of words provided in the language sample, the following analysis was restricted to participants (N=636) whose combined text response consisted of at least 100 tokens. The machine learning was used in two settings: unsupervised (clustering) and supervised (classification or regression).

In addition to the clustering, we investigated to what extent features obtained from a language sample could be used for predicting concerns, mitigating actions, impact on lifestyle behaviours, and wellbeing and depression scores in the context of COVID-19. A model which predicts these attitudes and behaviours and requires only a language sample could potentially be used within a digital environment to better identify people who might be more likely to be negatively impacted and offer them preventative support.

For each attitude or behaviour we trained a separate binary or multi-class classifier. We first explored a range of different classifiers (logistic regression, support vector machine, stochastic gradient descent classifier, and Random Forest). Across all classifiers we found that Random Forest achieved the best results, and we tuned the parameters for each classifier separately. The tuned parameters were then used to train the final classifiers using 10-fold cross-validation. As there were only sufficient language samples for 636 participants, we also trained classifiers using GloVe word vectors obtained from the same language model as the tokens. By using word vectors, we were able to train prediction models using all participants' data.

All classification problems were evaluated using the Area Under the Receiver Operating Characteristics (AUROC) metric, while regression problems were evaluated using Mean Absolute Error (MAE) and explained variance.

---

<sup>1</sup> [https://spacy.io/models/en#en\\_core\\_web\\_lg](https://spacy.io/models/en#en_core_web_lg)

## Prediction models

### *Concerns about COVID-19*

The responses relating to concerns were all expressed on a [1,10] scale. To form classes, the values were split into 'slight' (1-3), 'some' (4-7) and 'great' (8-10). Word vectors achieved the best performance with AUROC ranging from 0.71 to 0.78; see Supplementary Table 3.

### *Mitigating COVID-19*

The mitigating actions each formed a binary class (i.e. someone either used particular mitigation action or not). Best performance was achieved by word vectors with AUROC ranging between 0.67 and 0.82. In the case of a more unbalanced class (predicting someone taking all possible mitigating actions), the best AUROC score (0.68) was achieved by personality and sentiment features; see Supplementary Table 2.

### *Impact of COVID-19 on Health and Lifestyle Related Behaviours*

The responses on the impact of COVID-19 on lifestyle behaviours, used scales which were converted to classes as follows. Scale [-2,2] (used for alcohol consumption, physical activity, smoking, e-cigarettes, and recreational drug use) was converted to 'Decrease' [-2,-1], 'No Change' [0], 'Increase' [1,2]. Scale [0,4] (used for shopping, diet and sleep) was converted to 'No or little impact' [0,1], 'Some impact' [2], 'Great impact' [3,4]. For the lifestyle behaviours which were not well represented in the survey cohort (smoking, e-cigarettes, and recreational drug use) the results are very low (AUROC slightly better than random at 0.53 for recreational drug use). The best classifiers for other lifestyle behaviours had AUROC scores between 0.72 and 0.81; see Supplementary Table 4.

### *Impact of COVID-19 on Wellbeing*

The scores for WEMWBS and PHQ-9 for both measures were used directly as target variables in the regression models. Unlike the prediction models reported previously, for both wellbeing and depression scores the best performing models used personality and sentiment scores. The model for depression achieved MAE = 4.25 and explained variance of 0.15, while the wellbeing model achieved MAE=7.97 and explained variance of 0.17; see Supplementary Table 5.

**Supplementary Table 1.** Prediction results for mitigating actions using three feature groups and evaluated using AUROC. The best performing feature group is in bold.

|                                    | Social distancing | Self-isolation | PPE         | Online shopping | Shielding   | All above   |
|------------------------------------|-------------------|----------------|-------------|-----------------|-------------|-------------|
| # positive class                   | 491               | 306            | 208         | 304             | 173         | 77          |
| # negative class                   | 145               | 330            | 428         | 332             | 463         | 559         |
| Personality and sentiment features | 0.66              | 0.55           | 0.51        | 0.49            | 0.62        | <b>0.68</b> |
| Word vectors                       | <b>0.82</b>       | <b>0.7</b>     | <b>0.67</b> | <b>0.68</b>     | <b>0.73</b> | 0.54        |
| All features                       | 0.71              | 0.58           | 0.51        | 0.52            | 0.69        | 0.67        |

**Supplementary Table 2.** Prediction results for concerns using three feature groups and evaluated using AUROC. The best performing feature group is in bold.

|                                    | Becoming infected | Severe illness or death | Spreading to others | Access to healthcare | Enough support | Less care compared to low risk |
|------------------------------------|-------------------|-------------------------|---------------------|----------------------|----------------|--------------------------------|
| # Slight concern                   | 60                | 71                      | 114                 | 197                  | 156            | 236                            |
| # Some concern                     | 214               | 164                     | 190                 | 229                  | 185            | 160                            |
| # Great concern                    | 362               | 401                     | 332                 | 210                  | 295            | 240                            |
| Personality and sentiment features | 0.63              | 0.6                     | 0.54                | 0.58                 | 0.58           | 0.58                           |
| Word vectors                       | <b>0.78</b>       | <b>0.78</b>             | <b>0.73</b>         | <b>0.71</b>          | <b>0.71</b>    | <b>0.71</b>                    |
| All features                       | 0.64              | 0.62                    | 0.52                | 0.58                 | 0.58           | 0.58                           |

**Supplementary Table 3.** Prediction results for lifestyle behaviours using three feature groups and evaluated using AUROC. The best performing feature group is in bold.

|                                    | Shopping    | Diet        | Alcohol     | Amount of physical activity | Sleep       | Smoking    | E-cigarettes | Recreational drugs |
|------------------------------------|-------------|-------------|-------------|-----------------------------|-------------|------------|--------------|--------------------|
| # Decrease / Little impact         | 47          | 302         | 96          | 385                         | 293         | 5          | 2            | 3                  |
| # No change / Some impact          | 90          | 205         | 372         | 99                          | 157         | 623        | 624          | 628                |
| # Increase / Great impact          | 499         | 129         | 168         | 152                         | 186         | 8          | 10           | 5                  |
| Personality and sentiment features | 0.56        | 0.62        | 0.61        | 0.65                        | 0.65        | 0.44       | 0.55         | 0.36               |
| Word vectors                       | <b>0.81</b> | <b>0.74</b> | <b>0.72</b> | <b>0.8</b>                  | <b>0.75</b> | <b>0.6</b> | <b>0.67</b>  | 0.45               |
| All features                       | 0.55        | 0.6         | 0.56        | 0.61                        | 0.65        | 0.58       | 0.58         | <b>0.53</b>        |

**Supplementary Table 4.** Prediction results for depression (Patient Health Questionnaire, PHQ-9) and wellbeing score (Warwick-Edinburgh Mental Well-being Scale, WEMWBS) using three feature groups and evaluated using mean absolute error and explained variance. The best performing feature group is in bold.

|                                               | Depression score (PHQ-9) | Wellbeing score (WEMWBS) |
|-----------------------------------------------|--------------------------|--------------------------|
| # participants                                | 584                      | 636                      |
| Personality and sentiment features, MAE       | <b>4.25</b>              | <b>7.97</b>              |
| Personality and sentiment features, Exp. Var. | <b>0.15</b>              | <b>0.17</b>              |
| Word vectors, MAE                             | 4.52                     | 8.6                      |
| Word vectors, Exp. Var.                       | 0.07                     | 0.1                      |
| All features, MAE                             | 4.33                     | 8.15                     |
| All features, Exp. Var.                       | 0.12                     | 0.13                     |



**Supplementary Table 5.** Impact of COVID-19 on Lifestyle Related Behaviours

|                                      |                                 |        | <b>OR (95% CI)</b> |
|--------------------------------------|---------------------------------|--------|--------------------|
| <b>Changes to shopping behaviour</b> |                                 |        |                    |
|                                      | Chronic kidney disease          | Yes    | 1.62 (1.01, 2.60)  |
|                                      |                                 | No     | 1.00               |
|                                      | Gender                          | Female | 1.18 (1.02, 1.38)  |
|                                      |                                 | Male   | 1.00               |
| <b>Changes to diet</b>               |                                 |        |                    |
|                                      | Gender                          | Female | 1.19 (1.02, 1.39)  |
|                                      |                                 | Male   | 1.00               |
|                                      | Age                             |        | 0.99 (0.98, 1.00)  |
|                                      | BMI                             |        | 1.02 (1.00, 1.03)  |
| <b>Change to activity amount</b>     |                                 |        |                    |
|                                      | Chronic respiratory disease     | Yes    | 0.70 (0.50, 0.97)  |
|                                      |                                 | No     | 1.00               |
|                                      | Chronic kidney disease          | Yes    | 0.65 (0.44, 0.96)  |
|                                      |                                 | No     | 1.00               |
|                                      | Weakened immune system          | Yes    | 0.54 (0.37, 0.78)  |
|                                      |                                 | No     | 1.00               |
|                                      | BMI                             |        | 0.98 (0.97, 1.00)  |
| <b>Changes to activity type</b>      |                                 |        |                    |
|                                      | Chronic neurological conditions | Yes    | 0.23 (0.06, 1.00)  |
|                                      |                                 | No     | 1.00               |

**Supplementary Table 6** Median wellbeing (Warwick-Edinburgh Mental Well-being Scale, WEMWBS) and depression (Patient Health Questionnaire, PHQ-9) scores based on high risk group.

|                                                  | <b>Wellbeing</b>         | <b>Depression</b>        |
|--------------------------------------------------|--------------------------|--------------------------|
|                                                  | <b>Median [Min, Max]</b> | <b>Median [Min, Max]</b> |
| <b>Diabetes</b>                                  |                          |                          |
| Yes                                              | 45.0 [14.0, 70.0]        | 6.00 [0, 26.0]           |
| No                                               | 46.0 [14.0, 70.0]        | 7.00 [0, 26.0]           |
| <b>BMI <math>\geq</math> 40 kg/m<sup>2</sup></b> |                          |                          |
| Yes                                              | 40.6 [15.0, 70.0]        | 10.00 [0, 26.0]          |
| No                                               | 46.0 [14.0, 70.0]        | 6.00 [0, 26.0]           |
| <b>Chronic Respiratory Disease</b>               |                          |                          |
| Yes                                              | 43.5 [14.0, 70.0]        | 9.00 [0, 26.0]           |
| No                                               | 46.0 [14.0, 70.0]        | 6.00 [0, 26.0]           |
| <b>Chronic Heart Disease</b>                     |                          |                          |
| Yes                                              | 47.4 [14.0, 70.0]        | 7.00 [0, 26.0]           |
| No                                               | 45.0 [14.0, 70.0]        | 6.00 [0, 26.0]           |
| <b>Chronic Kidney Disease</b>                    |                          |                          |
| Yes                                              | 47.0 [14.0, 70.0]        | 6.00 [0, 26.0]           |
| No                                               | 45.0 [14.0, 70.0]        | 6.00 [0, 26.0]           |
| <b>Chronic Liver Disease</b>                     |                          |                          |
| Yes                                              | 43.0 [15.0, 62.0]        | 7.00 [0, 22.0]           |
| No                                               | 46.0 [14.0, 70.0]        | 6.00 [0, 26.0]           |
| <b>Chronic Neurological Conditions</b>           |                          |                          |
| Yes                                              | 46.2 [19.0, 66.0]        | 8.00 [0, 22.0]           |
| No                                               | 45.0 [14.0, 70.0]        | 6.00 [0, 26.0]           |
| <b>Spleen problems</b>                           |                          |                          |
| Yes                                              | 46.0 [26.0, 66.0]        | 5.00 [2.0, 13.0]         |
| No                                               | 45.0 [14.0, 70.0]        | 6.00 [0, 26.0]           |
| <b>Weakened immune system</b>                    |                          |                          |
| Yes                                              | 46.0 [14.0, 68.0]        | 6.00 [0, 26.0]           |
| No                                               | 45.0 [14.0, 70.0]        | 6.00 [0, 26.0]           |

**Aged > 70 years**

|     |                   |                |
|-----|-------------------|----------------|
| Yes | 51.0 [14.0, 70.0] | 3.00 [0, 26.0] |
| No  | 44.0 [14.0, 70.0] | 7.00 [0, 26.0] |

**Pregnant**

|     |                   |                |
|-----|-------------------|----------------|
| Yes | 42.0 [29.0, 61.0] | 6.00 [0, 17.0] |
| No  | 46.0 [14.0, 70.0] | 6.00 [0, 26.0] |

**Other risk factors \***

|     |                   |                |
|-----|-------------------|----------------|
| Yes | 44.0 [14.0, 70.0] | 8.00 [0, 26.0] |
| No  | 46.0 [14.0, 70.0] | 6.00 [0, 26.0] |

---

\* *Changed type or frequency of support*

**Supplementary Table 7.** Impact on Management of Health Conditions and Use of Technology

|                                                   |                        |     | <b>OR (95% CI)</b> |
|---------------------------------------------------|------------------------|-----|--------------------|
| <b>Changes to management of health conditions</b> |                        |     |                    |
|                                                   | Chronic liver disease  | Yes | 3.15 (1.29, 8.01)  |
|                                                   |                        | No  | 1.00               |
| <b>Changes to appointments</b>                    |                        |     |                    |
|                                                   | Diabetes               | Yes | 2.40 (1.11, 5.75)  |
|                                                   |                        | No  | 1.00               |
|                                                   | Chronic liver disease  | Yes | 3.48 (1.16, 12.16) |
|                                                   |                        | No  | 1.00               |
|                                                   | Weakened immune system | Yes | 2.90 (1.18, 7.93)  |
|                                                   |                        | No  | 1.00               |
| <b>Changes to medication</b>                      |                        |     |                    |
|                                                   | Spleen problems        | Yes | 7.10 (1.45, 53.03) |
|                                                   |                        | No  | 1.00               |
| <b>Changes to elective surgery</b>                |                        |     |                    |
|                                                   | Age                    |     | 1.03 (1.01, 1.06)  |
| <b>Clinician</b>                                  |                        |     |                    |
|                                                   | Age                    |     | 1.03 (1.01, 1.05)  |
| <b>Other changes</b>                              |                        |     |                    |
|                                                   | Aged > 70 years        | Yes | 0.24 (0.05, 0.88)  |
|                                                   |                        | No  | 1.00               |
| <b>Platforms used to receive care</b>             |                        |     |                    |
| <b>Social media</b>                               |                        |     |                    |
|                                                   | Chronic liver disease  | Yes | 5.91 (1.62, 20.84) |
|                                                   |                        | No  | 1.00               |
| <b>Email</b>                                      |                        |     |                    |
|                                                   | Age                    |     | 0.98 (0.96, 1.00)  |
| <b>Telephone</b>                                  |                        |     |                    |
|                                                   | Aged > 70 years        | Yes | 0.46 (0.21, 0.99)  |
|                                                   |                        | No  | 1.00               |
| <b>Virtual consultation</b>                       |                        |     |                    |
|                                                   | Chronic liver disease  | Yes | 4.39 (1.41, 13.20) |

1  
2  
3  
4  
5  
6  
7  
8  
9  
10  
11  
12  
13  
14  
15  
16  
17  
18  
19  
20  
21  
22  
23  
24  
25  
26  
27  
28  
29  
30  
31  
32  
33  
34  
35  
36  
37  
38  
39  
40  
41  
42  
43  
44  
45  
46  
47

---

|  |                                 |     |                    |
|--|---------------------------------|-----|--------------------|
|  |                                 | No  | 1.00               |
|  | Chronic neurological conditions | Yes | 3.56 (1.06, 10.98) |
|  |                                 | No  | 1.00               |
|  | Gender                          | Yes | 0.56 (0.32, 0.98)  |
|  |                                 | No  | 1.00               |

---

For peer review only

**Supplementary Table 8.** Mitigating actions taken in response to the coronavirus outbreak.

|                                                    | <b>Diabetes</b><br>(N=538) | <b>BMI</b><br><b>≥ 40 kg/m<sup>2</sup></b><br>(N=142) | <b>Chronic</b><br><b>Respiratory</b><br><b>Disease</b><br>(N=179) | <b>Chronic</b><br><b>Heart</b><br><b>Disease</b><br>(N=132) | <b>Chronic</b><br><b>Kidney</b><br><b>Disease</b><br>(N=147) | <b>Chronic</b><br><b>Liver</b><br><b>Disease</b><br>(N=49) | <b>Chronic</b><br><b>Neurological</b><br><b>Disease</b><br>(N=35) | <b>Spleen</b><br><b>Problems</b><br>(N=16) | <b>Weakened</b><br><b>Immune</b><br><b>System</b><br>(N=159) | <b>Aged</b><br><b>&gt; 70 years</b><br>(N=178) | <b>Pregnant</b><br>(N=21) | <b>Other</b><br><b>Risk</b><br><b>Factors</b><br>(N=303) |
|----------------------------------------------------|----------------------------|-------------------------------------------------------|-------------------------------------------------------------------|-------------------------------------------------------------|--------------------------------------------------------------|------------------------------------------------------------|-------------------------------------------------------------------|--------------------------------------------|--------------------------------------------------------------|------------------------------------------------|---------------------------|----------------------------------------------------------|
| <b>Social distancing n (%)</b>                     |                            |                                                       |                                                                   |                                                             |                                                              |                                                            |                                                                   |                                            |                                                              |                                                |                           |                                                          |
| Yes                                                | 446 (82.9%)                | 105 (73.9%)                                           | 125 (69.8%)                                                       | 90 (68.2%)                                                  | 82 (55.8%)                                                   | 32 (65.3%)                                                 | 26 (74.3%)                                                        | 9 (56.2%)                                  | 71 (44.7%)                                                   | 135 (75.8%)                                    | 18 (85.7%)                | 212 (70.0%)                                              |
| No                                                 | 92 (17.1%)                 | 37 (26.1%)                                            | 54 (30.2%)                                                        | 42 (31.8%)                                                  | 65 (44.2%)                                                   | 17 (34.7%)                                                 | 9 (25.7%)                                                         | 7 (43.8%)                                  | 88 (55.3%)                                                   | 43 (24.2%)                                     | 3 (14.3%)                 | 91 (30.0%)                                               |
| <b>Self-isolation n (%)</b>                        |                            |                                                       |                                                                   |                                                             |                                                              |                                                            |                                                                   |                                            |                                                              |                                                |                           |                                                          |
| Yes                                                | 263 (48.9%)                | 68 (47.9%)                                            | 83 (46.4%)                                                        | 58 (43.9%)                                                  | 66 (44.9%)                                                   | 19 (38.8%)                                                 | 21 (60.0%)                                                        | 7 (43.8%)                                  | 61 (38.4%)                                                   | 102 (57.3%)                                    | 10 (47.6%)                | 148 (48.8%)                                              |
| No                                                 | 275 (51.1%)                | 74 (52.1%)                                            | 96 (53.6%)                                                        | 74 (56.1%)                                                  | 81 (55.1%)                                                   | 30 (61.2%)                                                 | 14 (40.0%)                                                        | 9 (56.2%)                                  | 98 (61.6%)                                                   | 76 (42.7%)                                     | 11 (52.4%)                | 155 (51.2%)                                              |
| <b>Worn protective apparel n (%)</b>               |                            |                                                       |                                                                   |                                                             |                                                              |                                                            |                                                                   |                                            |                                                              |                                                |                           |                                                          |
| Yes                                                | 201 (37.4%)                | 47 (33.1%)                                            | 59 (33.0%)                                                        | 44 (33.3%)                                                  | 30 (20.4%)                                                   | 17 (34.7%)                                                 | 13 (37.1%)                                                        | 1 (6.2%)                                   | 22 (13.8%)                                                   | 57 (32.0%)                                     | 6 (28.6%)                 | 106 (35.0%)                                              |
| No                                                 | 337 (62.6%)                | 95 (66.9%)                                            | 120 (67.0%)                                                       | 88 (66.7%)                                                  | 117 (79.6%)                                                  | 32 (65.3%)                                                 | 22 (62.9%)                                                        | 15 (93.8%)                                 | 137 (86.2%)                                                  | 121 (68.0%)                                    | 15 (71.4%)                | 197 (65.0%)                                              |
| <b>Used online shopping or food delivery n (%)</b> |                            |                                                       |                                                                   |                                                             |                                                              |                                                            |                                                                   |                                            |                                                              |                                                |                           |                                                          |
| Yes                                                | 258 (48.0%)                | 67 (47.2%)                                            | 77 (43.0%)                                                        | 66 (50.0%)                                                  | 60 (40.8%)                                                   | 28 (57.1%)                                                 | 18 (51.4%)                                                        | 7 (43.8%)                                  | 55 (34.6%)                                                   | 96 (53.9%)                                     | 10 (47.6%)                | 125 (41.3%)                                              |
| No                                                 | 280 (52.0%)                | 75 (52.8%)                                            | 102 (57.0%)                                                       | 66 (50.0%)                                                  | 87 (59.2%)                                                   | 21 (42.9%)                                                 | 17 (48.6%)                                                        | 9 (56.2%)                                  | 104 (65.4%)                                                  | 82 (46.1%)                                     | 11 (52.4%)                | 178 (58.7%)                                              |
| <b>Shielding n (%)</b>                             |                            |                                                       |                                                                   |                                                             |                                                              |                                                            |                                                                   |                                            |                                                              |                                                |                           |                                                          |
| Yes                                                | 100 (18.6%)                | 33 (23.2%)                                            | 65 (36.3%)                                                        | 38 (28.8%)                                                  | 68 (46.3%)                                                   | 22 (44.9%)                                                 | 6 (17.1%)                                                         | 11 (68.8%)                                 | 85 (53.5%)                                                   | 38 (21.3%)                                     | 2 (9.5%)                  | 80 (26.4%)                                               |
| No                                                 | 438 (81.4%)                | 109 (76.8%)                                           | 114 (63.7%)                                                       | 94 (71.2%)                                                  | 79 (53.7%)                                                   | 27 (55.1%)                                                 | 29 (82.9%)                                                        | 5 (31.2%)                                  | 74 (46.5%)                                                   | 140 (78.7%)                                    | 19 (90.5%)                | 223 (73.6%)                                              |
| <b>All of the above n (%)</b>                      |                            |                                                       |                                                                   |                                                             |                                                              |                                                            |                                                                   |                                            |                                                              |                                                |                           |                                                          |
| Yes                                                | 55 (10.2%)                 | 19 (13.4%)                                            | 22 (12.3%)                                                        | 23 (17.4%)                                                  | 31 (21.1%)                                                   | 7 (14.3%)                                                  | 4 (11.4%)                                                         | 2 (12.5%)                                  | 40 (25.2%)                                                   | 29 (16.3%)                                     | 2 (9.5%)                  | 46 (15.2%)                                               |
| No                                                 | 483 (89.8%)                | 123 (86.6%)                                           | 157 (87.7%)                                                       | 109 (82.6%)                                                 | 116 (78.9%)                                                  | 42 (85.7%)                                                 | 31 (88.6%)                                                        | 14 (87.5%)                                 | 119 (74.8%)                                                  | 149 (83.7%)                                    | 19 (90.5%)                | 257 (84.8%)                                              |

**Supplementary Table 9.** Mitigating COVID-19

|                                    |                        |     | <b>OR (95% CI)</b> |
|------------------------------------|------------------------|-----|--------------------|
| <b>Social distancing</b>           |                        |     |                    |
|                                    | Weakened immune system | Yes | 0.34 (0.16, 0.73)  |
|                                    |                        | No  | 1.00               |
|                                    | Diabetes               | Yes | 2.44 (1.25, 4.90)  |
|                                    |                        | No  | 1.00               |
| <b>Protective apparel</b>          |                        |     |                    |
|                                    | Diabetes               | Yes | 2.17 (1.13, 4.14)  |
|                                    |                        | No  | 1.00               |
| <b>Shop online</b>                 |                        |     |                    |
|                                    | Aged > 70 years        | Yes | 2.66 (1.24, 5.88)  |
|                                    |                        | No  | 1.00               |
|                                    | Chronic liver disease  | Yes | 3.34 (1.42, 8.14)  |
|                                    |                        | No  | 1.00               |
| <b>Shielding</b>                   |                        |     |                    |
|                                    | Chronic kidney disease | Yes | 2.76 (1.21, 6.31)  |
|                                    |                        | No  | 1.00               |
|                                    | Weakened immune system | Yes | 3.33 (1.55, 7.22)  |
|                                    |                        | No  | 1.00               |
|                                    | Spleen problems        | Yes | 5.33 (1.15, 28.78) |
|                                    |                        | No  | 1.00               |
| <b>All mitigating risk actions</b> |                        |     |                    |
|                                    | Weakened immune system | Yes | 2.61 (1.01, 6.41)  |
|                                    |                        | No  | 1.00               |

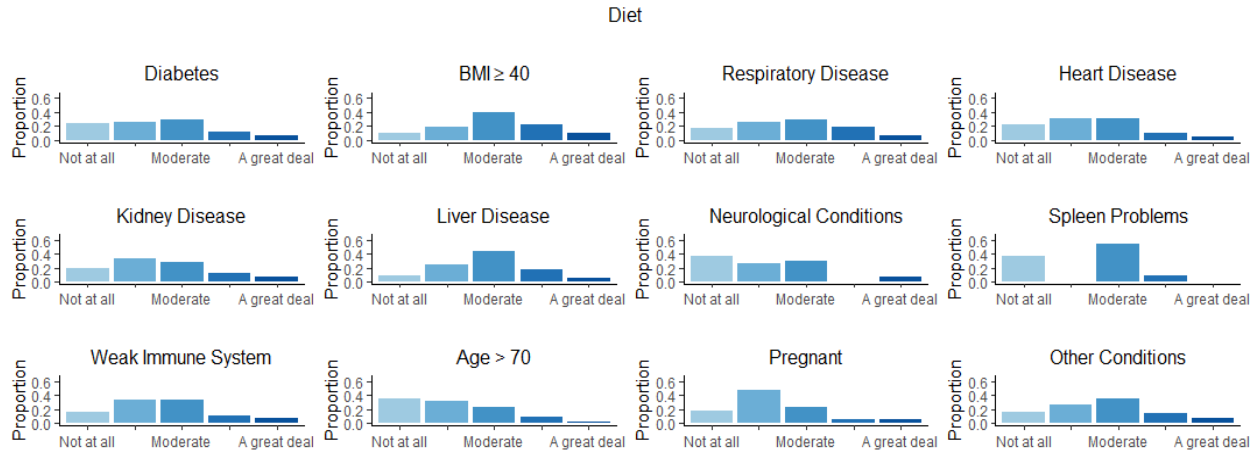

**Supplementary Figure 1.** Change in diet compared to pre-COVID-19 for each high-risk indicator of severe illness from COVID-19 as identified by the UK Government, or based on individual perception due to an acute or chronic health condition.

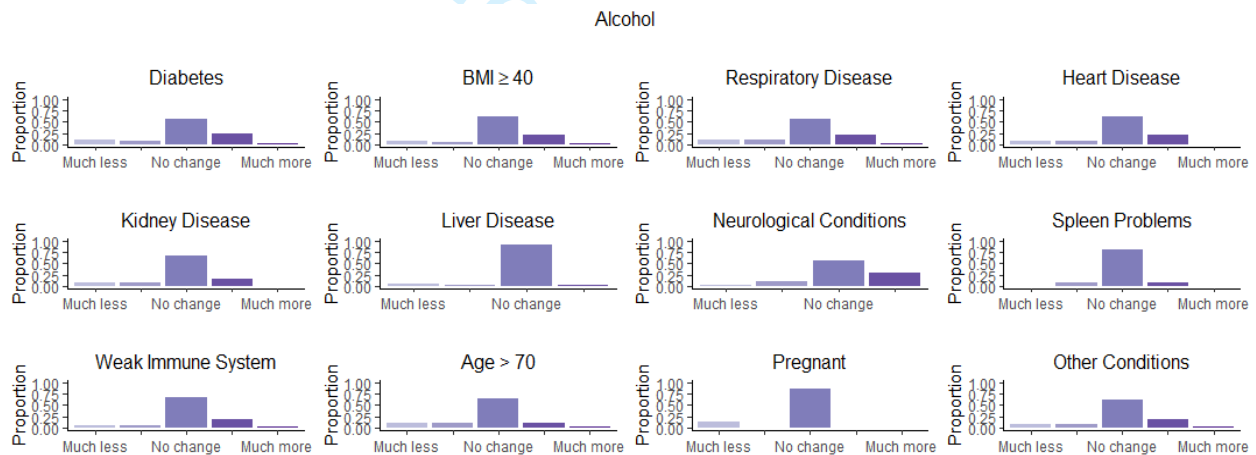

**Supplementary Figure 2.** Change in alcohol consumption compared to pre-COVID-19 for each high-risk indicator of severe illness from COVID-19 as identified by the UK Government, or based on individual perception due to an acute or chronic health condition.



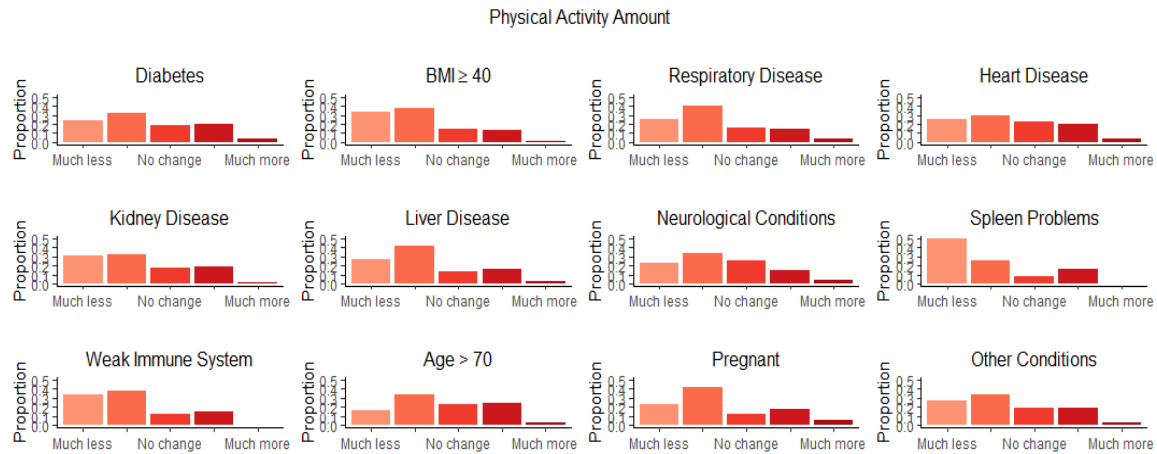

**Supplementary Figure 3.** Change in amount of physical activity compared to pre-COVID-19 for each high-risk indicator of severe illness from COVID-19 as identified by the UK Government, or based on individual perception due to an acute or chronic health condition.

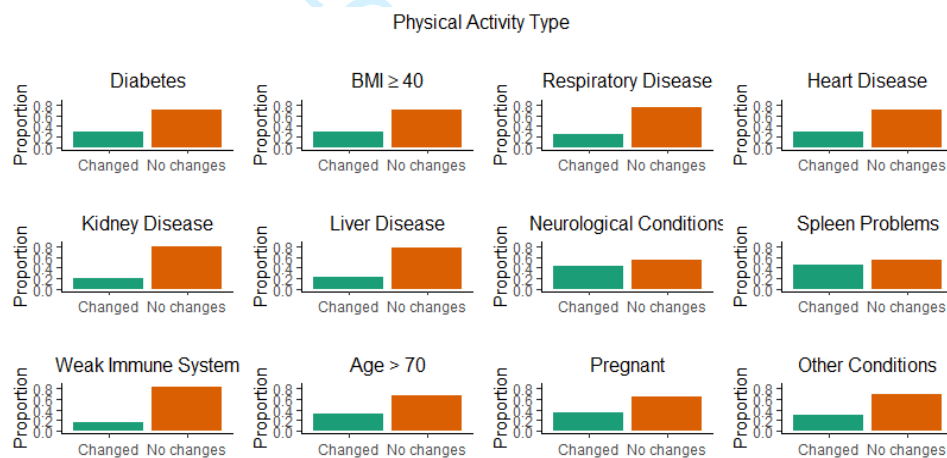

**Supplementary Figure 4.** Change in type of physical activity compared to pre-COVID-19 for each high-risk indicator of severe illness from COVID-19 as identified by the UK Government, or based on individual perception due to an acute or chronic health condition.

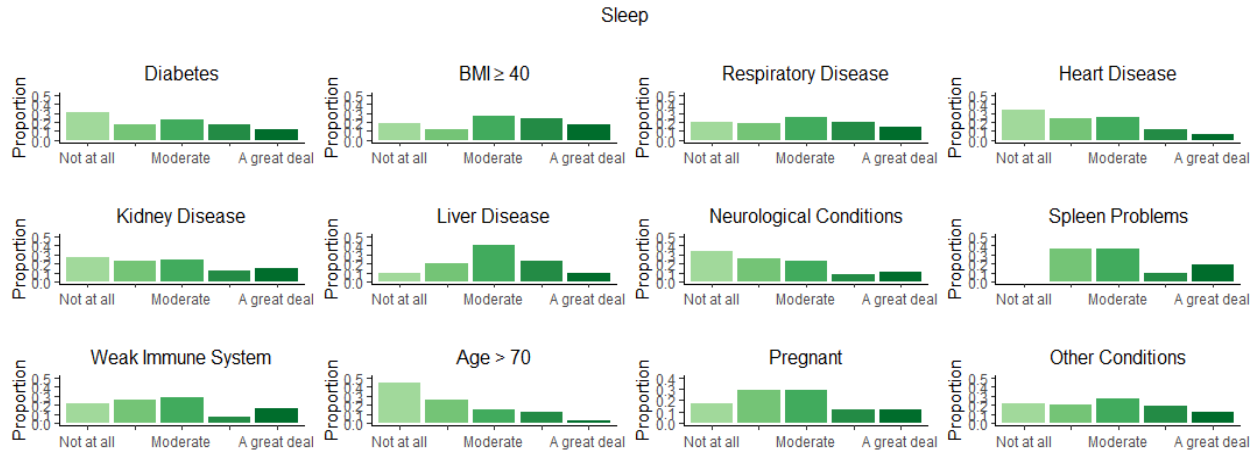

**Supplementary Figure 5.** Change in amount or quality of sleep compared to pre-COVID-19 for each high-risk indicator of severe illness from COVID-19 as identified by the UK Government, or based on individual perception due to an acute or chronic health condition.

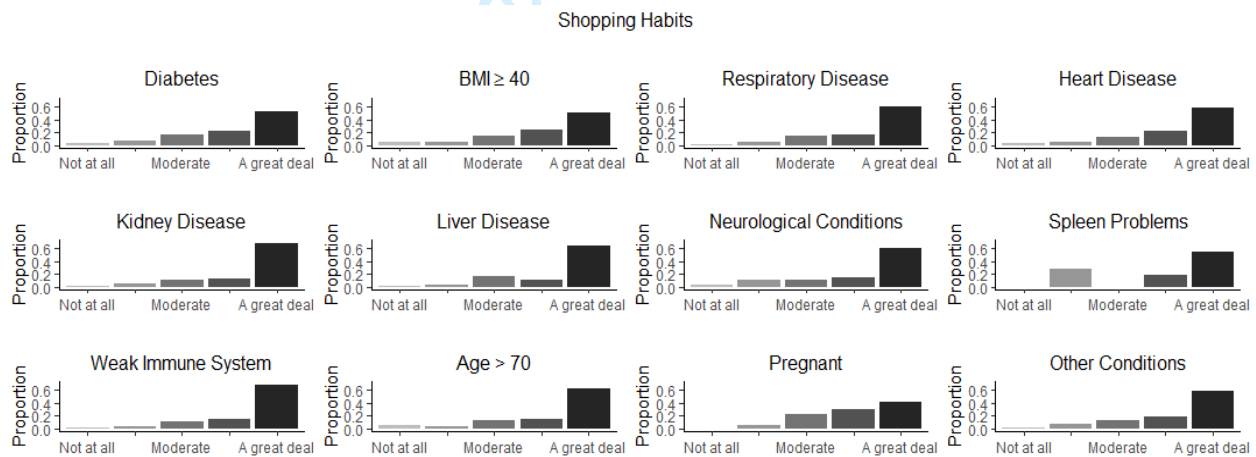

**Supplementary Figure 6.** Change in shopping compared to pre-COVID-19 for each high-risk indicator of severe illness from COVID-19 as identified by the UK Government, or based on individual perception due to an acute or chronic health condition.

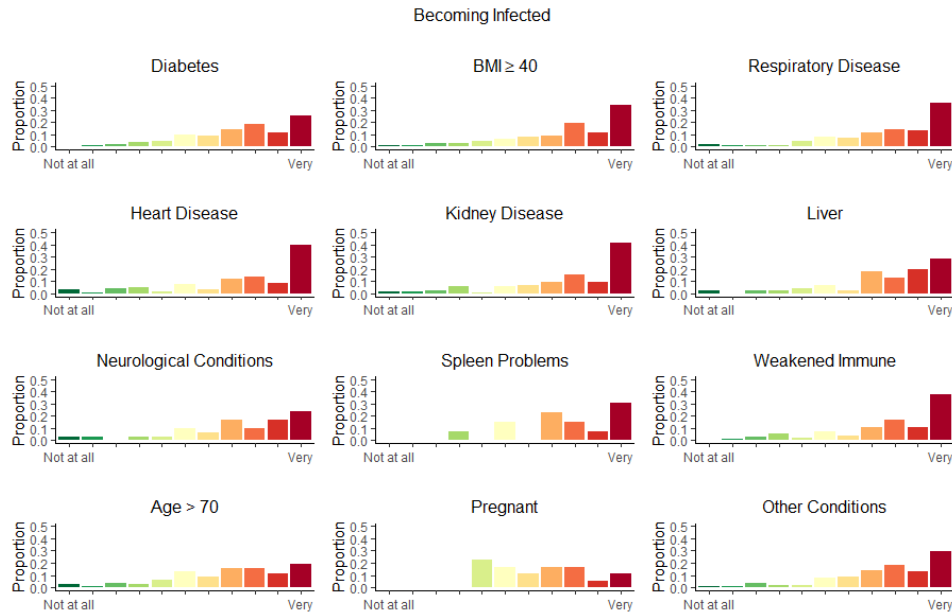

**Supplementary Figure 7:** Concern about becoming infected with COVID-19 for each high-risk indicator as identified by the UK Government, or based on individual perception due to an acute or chronic health condition.

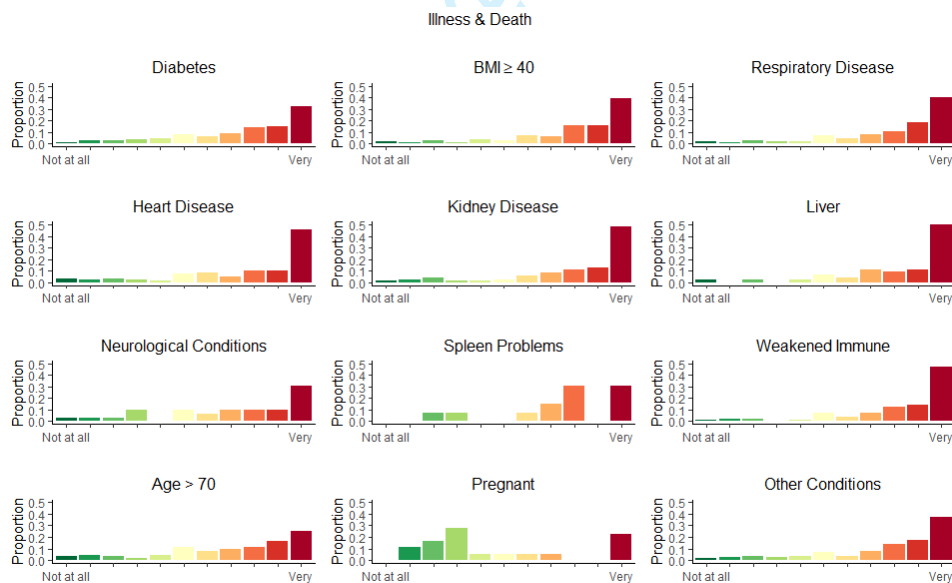

**Supplementary Figure 8:** Concern about severe illness and possible death from COVID-19 for each high-risk indicator as identified by the UK Government, or based on individual perception due to an acute or chronic health condition.

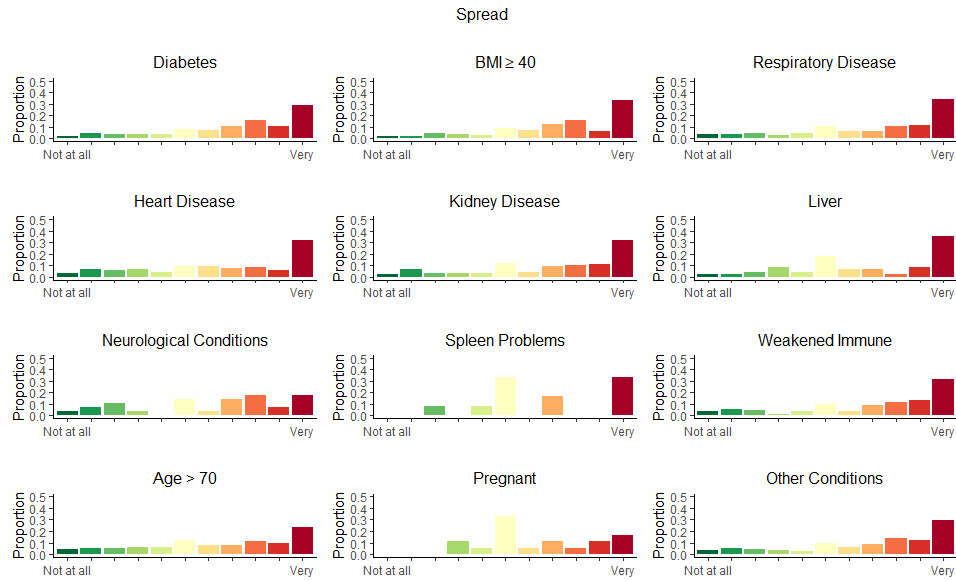

**Supplementary Figure 9:** Concern about spreading COVID-19 to others including family and friends for each high-risk indicator as identified by the UK Government, or based on individual perception due to an acute or chronic health condition.

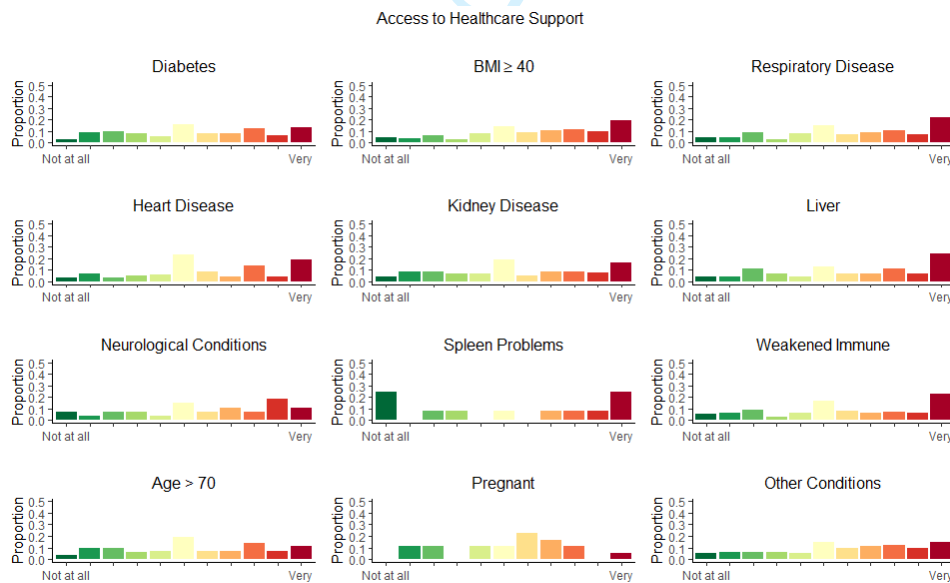

**Supplementary Figure 10:** Concern about access to healthcare support for each high-risk indicator as identified by the UK Government, or based on individual perception due to an acute or chronic health condition.

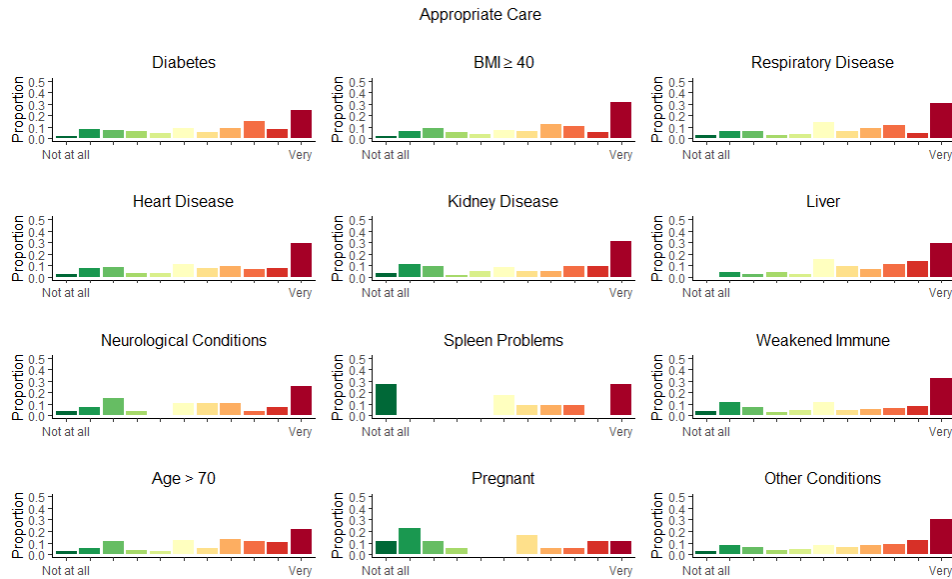

**Supplementary Figure 11:** Concern about access to appropriate care if infected with COVID-19 for each high-risk indicator as identified by the UK Government, or based on individual perception due to an acute or chronic health condition.

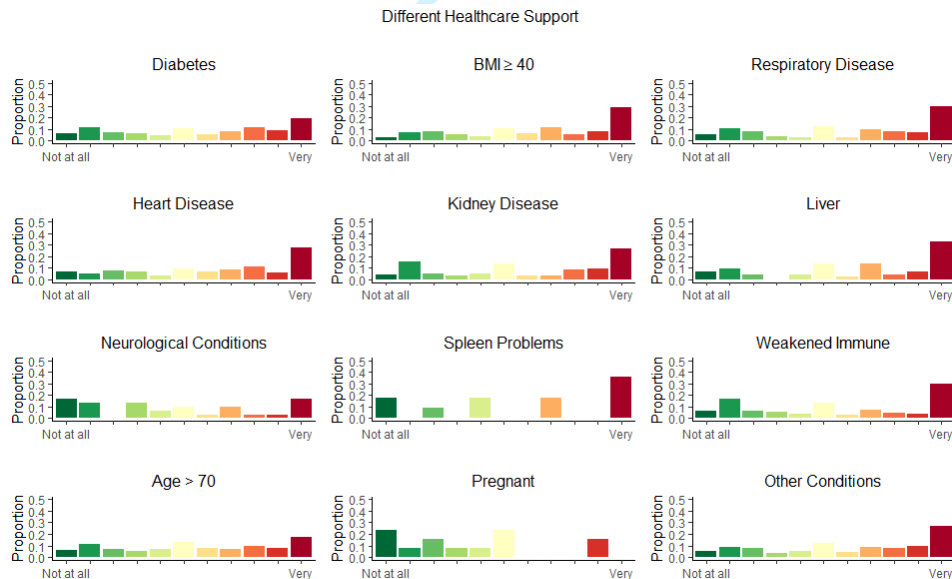

**Supplementary Figure 12:** Concern about disparate care as a result of high-risk status for each indicator as identified by the UK Government, or based on individual perception due to an acute or chronic health condition.

**BMJ Checklist: A cross-sectional analysis to explore the Awareness, Attitudes and Actions of UK adults at high risk of severe illness from COVID-19**

| Criteria                                                                                                                                                                                                                                                                                                                                                                                                                                                       | Response |
|----------------------------------------------------------------------------------------------------------------------------------------------------------------------------------------------------------------------------------------------------------------------------------------------------------------------------------------------------------------------------------------------------------------------------------------------------------------|----------|
| <b>Author information:</b> Have you provided up-to-date details of all of your <a href="#">co-authors</a> ? In the final published article author names, institutions and addresses will be taken from these completed fields and not from the submitted Word document. Have you got an <a href="#">ORCID iD</a> ? All BMJ journals publishing primarily original research now mandate ORCID iDs for all submitting authors at the time of article submission. | Yes      |
| <b>Manuscript length and formatting:</b> Have you provided your abstract in the correct format? Have you supplied any required additional information for your article type, such as key messages? Have you checked that your manuscript doesn't exceed the requirements for word count, number of tables and/or figures, and number of references?                                                                                                            | Yes      |
| <b>Tables:</b> Are your tables in an editable format? Have you embedded them into the main word document? Have they been cited in the text? Have you provided appropriate table legends? Have you uploaded any lengthy tables as supplementary files for online publication?                                                                                                                                                                                   | Yes      |
| <b>Figures:</b> Have you uploaded figures separately from the text? Have they been supplied in an acceptable format and are they of sufficient quality? Are they suitable for black and white reproduction (unless you intend to pay any required fees for colour printing)? Have the files been labelled appropriately? Have the figures been cited in the text? Have you provided appropriate figure legends?                                                | Yes      |
| <b>References:</b> Have all of the references been cited in the text?                                                                                                                                                                                                                                                                                                                                                                                          | Yes      |
| <b>Supplementary files:</b> Have you supplied these in an acceptable format? Have they been cited in the main text?                                                                                                                                                                                                                                                                                                                                            | Yes      |
| <b>Statements:</b> Have you included the necessary statements relating to <a href="#">author contributorship</a> , <a href="#">competing interests and funding</a> , <a href="#">data sharing</a> , <a href="#">patient consent</a> and <a href="#">ethical approval</a> ?                                                                                                                                                                                     | Yes      |
| <b>Acknowledgements:</b> Have you acknowledged all contributors who do not meet the criteria for authorship? Have you acknowledged if your work has been previously presented at a conference/published as a conference abstract?                                                                                                                                                                                                                              | Yes      |
| <b>Suggested reviewers:</b> Have you <a href="#">suggested reviewers</a> for your paper (if required by the journal)?                                                                                                                                                                                                                                                                                                                                          | Yes      |
| <b>Research reporting checklists:</b> Have you either provided the <a href="#">appropriate reporting guideline</a> for your study type, or explained why a checklist isn't required?                                                                                                                                                                                                                                                                           | Yes      |
| <b>Reproducing figures:</b> Have you <a href="#">obtained permission from the copyright holder</a> to re-use any previously published material? Has the source been acknowledged?                                                                                                                                                                                                                                                                              | Yes      |

**STROBE 2007 (v4) Statement—Checklist of items that should be included in reports of *cross-sectional studies***

| Section/Topic                | Item # | Recommendation                                                                                                                                                                       | Reported on page # |
|------------------------------|--------|--------------------------------------------------------------------------------------------------------------------------------------------------------------------------------------|--------------------|
| <b>Title and abstract</b>    | 1      | (a) Indicate the study's design with a commonly used term in the title or the abstract                                                                                               | Page 1             |
|                              |        | (b) Provide in the abstract an informative and balanced summary of what was done and what was found                                                                                  | Page 2             |
| <b>Introduction</b>          |        |                                                                                                                                                                                      |                    |
| Background/rationale         | 2      | Explain the scientific background and rationale for the investigation being reported                                                                                                 | Page 3             |
| Objectives                   | 3      | State specific objectives, including any prespecified hypotheses                                                                                                                     | Page 3             |
| <b>Methods</b>               |        |                                                                                                                                                                                      |                    |
| Study design                 | 4      | Present key elements of study design early in the paper                                                                                                                              | Page 3             |
| Setting                      | 5      | Describe the setting, locations, and relevant dates, including periods of recruitment, exposure, follow-up, and data collection                                                      | Page 3             |
| Participants                 | 6      | (a) Give the eligibility criteria, and the sources and methods of selection of participants                                                                                          | Page 3             |
| Variables                    | 7      | Clearly define all outcomes, exposures, predictors, potential confounders, and effect modifiers. Give diagnostic criteria, if applicable                                             | Page 3-4           |
| Data sources/<br>measurement | 8*     | For each variable of interest, give sources of data and details of methods of assessment (measurement). Describe comparability of assessment methods if there is more than one group | Page 3-4           |
| Bias                         | 9      | Describe any efforts to address potential sources of bias                                                                                                                            | -                  |
| Study size                   | 10     | Explain how the study size was arrived at                                                                                                                                            | -                  |
| Quantitative variables       | 11     | Explain how quantitative variables were handled in the analyses. If applicable, describe which groupings were chosen and why                                                         | Page 4             |
| Statistical methods          | 12     | (a) Describe all statistical methods, including those used to control for confounding                                                                                                | Page 4             |
|                              |        | (b) Describe any methods used to examine subgroups and interactions                                                                                                                  | Page 4             |
|                              |        | (c) Explain how missing data were addressed                                                                                                                                          | Page 4             |
|                              |        | (d) If applicable, describe analytical methods taking account of sampling strategy                                                                                                   | Page 4             |
|                              |        | (e) Describe any sensitivity analyses                                                                                                                                                | -                  |
| <b>Results</b>               |        |                                                                                                                                                                                      |                    |

|                          |     |                                                                                                                                                                                                              |          |
|--------------------------|-----|--------------------------------------------------------------------------------------------------------------------------------------------------------------------------------------------------------------|----------|
| Participants             | 13* | (a) Report numbers of individuals at each stage of study—eg numbers potentially eligible, examined for eligibility, confirmed eligible, included in the study, completing follow-up, and analysed            | Page 4-5 |
|                          |     | (b) Give reasons for non-participation at each stage                                                                                                                                                         | Page 5   |
|                          |     | (c) Consider use of a flow diagram                                                                                                                                                                           | -        |
| Descriptive data         | 14* | (a) Give characteristics of study participants (eg demographic, clinical, social) and information on exposures and potential confounders                                                                     | Page 4   |
|                          |     | (b) Indicate number of participants with missing data for each variable of interest                                                                                                                          | Page 4   |
| Outcome data             | 15* | Report numbers of outcome events or summary measures                                                                                                                                                         | -        |
| Main results             | 16  | (a) Give unadjusted estimates and, if applicable, confounder-adjusted estimates and their precision (eg, 95% confidence interval). Make clear which confounders were adjusted for and why they were included | Page 5-8 |
|                          |     | (b) Report category boundaries when continuous variables were categorized                                                                                                                                    | -        |
|                          |     | (c) If relevant, consider translating estimates of relative risk into absolute risk for a meaningful time period                                                                                             | -        |
| Other analyses           | 17  | Report other analyses done—eg analyses of subgroups and interactions, and sensitivity analyses                                                                                                               | Page 4   |
| <b>Discussion</b>        |     |                                                                                                                                                                                                              |          |
| Key results              | 18  | Summarise key results with reference to study objectives                                                                                                                                                     | Page 15  |
| Limitations              | 19  | Discuss limitations of the study, taking into account sources of potential bias or imprecision. Discuss both direction and magnitude of any potential bias                                                   | Page 16  |
| Interpretation           | 20  | Give a cautious overall interpretation of results considering objectives, limitations, multiplicity of analyses, results from similar studies, and other relevant evidence                                   | Page 16  |
| Generalisability         | 21  | Discuss the generalisability (external validity) of the study results                                                                                                                                        | Page 16  |
| <b>Other information</b> |     |                                                                                                                                                                                                              |          |
| Funding                  | 22  | Give the source of funding and the role of the funders for the present study and, if applicable, for the original study on which the present article is based                                                | Page 17  |

\*Give information separately for cases and controls in case-control studies and, if applicable, for exposed and unexposed groups in cohort and cross-sectional studies.

**Note:** An Explanation and Elaboration article discusses each checklist item and gives methodological background and published examples of transparent reporting. The STROBE checklist is best used in conjunction with this article (freely available on the Web sites of PLoS Medicine at <http://www.plosmedicine.org/>, Annals of Internal Medicine at <http://www.annals.org/>, and Epidemiology at <http://www.epidem.com/>). Information on the STROBE Initiative is available at [www.strobe-statement.org](http://www.strobe-statement.org).
